# Supplementary material for: Integrative analysis of non-targeted metabolome and transcriptome reveals the mechanism of volatile formation in pepper fruit
Source: Frontiers journal article supplement (doi:10.3389/fgene.2023.1290492), 2023-11-10
Supplement: Data_Sheet_1.ZIP [file Data_Sheet_1.ZIP]

## Sheet: 356 DEGs
Supplementary Table S8-356 Differentially expressed genes (FPKM > 10 and | log2Fold Change | > 2) in terpenes metabolism, fatty acids metabolism, hormones metabolism, cell signaling and transcription factors.
Gene id	WH-G1_fpkm	WH-G2_fpkm	WH-G3_fpkm	QH-G1_fpkm	QH-G2_fpkm	QH-G3_fpkm	WH-M1_fpkm	WH-M2_fpkm	WH-M3_fpkm	QH-M1_fpkm-23	QH-M2_fpkm	QH-M3_fpkm	QH-GvsWH-G_log2FoldChange	QH-GvsWH-G_pvalue	QHMvsWHM_log2FoldChange	QH-MvsWH-M_pvalue	QH-MvsQH-G_log2FoldChange	QH-MvsQH-G_pvalue	WH-MvsWH-G_log2FoldChange	WH-MvsWH-G_pvalue
Fatty acid metabolism
Capana08g001080	47.14	68.99	52.53	1.28	4.44	2.91	1.25	0.65	0.49	2.3	3.28	1.44	-4.26858	4.77e-22	1.55505	0.00356651	-0.297869	0.586147	-6.1302	1.4e-56
Capana08g002013	90.24	90.84	82.64	571.46	372.12	363.99	64.44	157.24	81.17	142.22	144.43	114.13	2.33077	4.36e-21	0.400427	0.270125	-1.70365	2.23e-11	0.215832	0.565768
Capana10g000322	7.67	11.68	9.37	1.22	0.88	1.26	2.26	3.18	2.32	30.06	32.41	24.93	-3.07591	1.5e-20	3.49123	5.66e-41	4.70721	2.31e-64	-1.87095	3.33e-09
Capana10g002384	36.43	43.16	30.29	272.12	167.61	176.68	1.73	2.05	0.43	3.01	4.28	2.5	2.51068	4.15e-19	1.21598	0.0456424	-5.97539	1.21e-80	-4.69184	7.06e-20
Capana06g001666	0	0	0	19.18	25.35	25.67	34.1	18.57	29.34	0	0	0	9.97037	2.96e-16	-10.288	1.3e-16	-10.0609	1.89e-16	10.1918	3.86e-16
Capana06g000897	136.99	223.11	119.42	879.62	607.27	691.68	128.37	181.89	136.13	149.1	155.82	122.21	2.20803	1.14e-12	-0.0662979	0.765689	-2.34835	2.03e-27	-0.0871708	0.785211
Capana07g001760	12.08	11.22	13.33	0	0	0	0	0	0	26.96	35.5	21.49	-8.78157	1.41e-12	9.85289	1.83e-15	9.99773	6.42e-16	-8.6423	4.48e-12
Capana09g000953	39.55	35	31.59	367.65	203.52	131.89	25.83	23.72	29.78	22.21	22.73	25.62	2.74933	1.06e-11	-0.171064	0.353979	-3.31422	7.88e-18	-0.403321	0.0325501
Capana08g000039	111.48	85.06	113.38	463.13	276.21	353.92	47.78	61.77	48.2	64.66	73.97	53.61	1.8383	1.57e-11	0.282701	0.194888	-2.50604	8.13e-22	-0.957639	8.98e-06
Capana12g001573	24.94	23.16	27.85	69.85	50.92	68.36	98.98	110.89	98.08	147.69	161.46	127.84	1.33559	1.22e-10	0.502638	0.00295954	1.21064	3.7e-09	2.03609	5.19e-41
Capana01g004020	6.8	1.78	1.1	80.36	44.46	34.67	0.07	0.19	0.06	0	0.06	0	4.05468	5.99e-09	-2.40371	0.315092	-11.3402	1.34e-19	-4.88576	8.06e-06
Capana00g004724	103.1	106.82	74.69	264.97	194.42	249.29	3.44	18.52	5.19	14.39	15.45	6.4	1.33721	1.22e-08	0.41127	0.530687	-4.28784	7.73e-33	-3.37355	4.22e-08
Capana05g000220	29.98	40.56	49.29	75.19	86.52	106.68	3.51	2.99	5.85	1.23	1.4	1.05	1.18269	1.03e-05	-1.74815	0.000591598	-6.18556	1.31e-85	-3.26054	2.11e-18
Capana06g001834	6.44	3.56	0.62	121.18	28.08	11.38	0	0	0	0	0	0	3.94582	4.23e-05	NA	NA	-12.6748	3.13e-11	-8.5543	5.19e-08
Capana03g001671	61.11	107.07	62.54	218.67	148.5	139.3	22.67	27.33	27.96	40.55	41.88	33.17	1.15881	0.000392088	0.566177	0.00413514	-2.12874	9.87e-18	-1.54922	2.57e-07
Capana00g003654	1.28	0.08	0.78	0	0	0	0	0	0	18	18.24	7	-5.82077	0.00440446	10.0284	6.66e-15	10.173	3.63e-15	-5.67192	0.00604823
Capana10g001620	48.95	31.85	49.99	130.16	56.88	70.29	334.45	347.4	419.16	411.55	408.45	271.76	0.996574	0.0119047	-0.0138642	0.953125	2.0862	1.5e-08	3.0899	4.83e-35
Capana01g000005	35.67	16.64	29.57	149.73	116.33	62.71	32.7	38.23	55.55	144.12	200.34	128.8	2.02095	3.44e-06	1.90212	7.01e-11	0.528007	0.146966	0.643819	0.086298
Capana01g001418	119.95	133.64	117.96	63.03	61.82	83.45	15.41	18.03	20.51	15.85	29.91	23.6	-0.814578	1.61e-05	0.359847	0.245443	-1.58506	1.1e-07	-2.76662	2.62e-50
Capana04g001422	90.8	16.92	144.01	289.33	302.3	218.87	471.72	1443.89	831.71	594.59	846.96	348.29	1.69794	0.010376	-0.621857	0.179145	1.14503	0.00104944	3.46457	1.52e-06
Capana06g000197	66.62	38.14	67.05	395.22	262.88	198.42	256.3	256.58	222.13	312.54	375.09	263.84	2.33518	3.05e-10	0.37021	0.0647873	0.153733	0.618136	2.11371	4.42e-14
Capana10g000625	5	5.16	2.09	126.55	74.46	29.75	0.5	0.44	0.53	0.28	0.2	0.07	4.25974	2.96e-13	-1.42623	0.0795753	-8.7107	6.94e-40	-3.0364	5.47e-09
Capana03g004592	10.71	20.23	11.89	69.79	46.65	22.5	0.77	1.13	0.42	5.68	7.37	4.93	1.72226	0.000302244	2.95134	2.5e-11	-2.94794	8.96e-12	-4.19067	1.09e-18
Capana12g000575	20.35	23.24	17.25	3.73	5.4	3.19	4.12	7.12	4.18	43.46	29.87	24.57	-2.28654	1.15e-16	2.66341	8.62e-15	2.99558	8.37e-20	-1.96368	3.13e-10
Capana12g002508	16.81	21.66	18.52	10.32	8.11	8.4	4.96	8.16	7.28	51.73	45.19	72.86	-1.06887	2.25e-07	3.05446	1.68e-24	2.66782	3.79e-24	-1.4656	9.4e-08
Capana11g000928	53.34	45.39	57.33	29.46	25.83	32.42	5.12	10.38	4.34	26.27	28.41	28.61	-0.813095	1e-05	2.06549	7.91e-09	-0.0717607	0.651262	-2.9588	6.77e-15
Capana00g002444	197.97	306.43	258.82	61.15	138.36	92.23	4.53	14.43	5.03	32.19	16.44	5.23	-1.37086	9.04e-05	1.16214	0.0910677	-2.43182	5.94e-05	-4.9754	4.98e-24
Capana00g003506	45.99	39.12	44.9	21.99	22.97	30.03	0.65	2.45	1.16	2.03	2.61	1.44	-0.77516	0.00014196	0.509838	0.403704	-3.62178	5.38e-33	-4.91356	1.4e-27
Capana07g000375	8.24	22.26	12.26	0.95	8.65	2.89	0.05	0.2	0.62	6.77	1.57	1.36	-1.76031	0.0209878	3.47753	0.000255176	-0.354067	0.693011	-5.59723	3.87e-14
Capana03g003690	0.36	0	0.46	0.48	0.17	0.18	1.16	0.63	2.85	9.87	8.47	23	0.0273743	0.983066	3.1543	1.28e-07	5.68144	2.53e-22	2.52019	0.0249527
Capana03g001691	16.68	10.51	14.56	15.2	7.5	8.77	0	0.11	0	0.13	0.1	0	-0.391603	0.302809	1.12095	0.690704	-7.07878	1.95e-19	-8.61039	1.61e-15
Capana12g002555	169.55	34.27	200.72	539.38	147.82	173.55	274.67	565.3	323.62	1142.7	1165.31	1684.35	1.10839	0.129004	1.77513	1.16e-07	2.21481	1.35e-05	1.54121	0.013677
Capana01g000113	36.94	76.89	28.49	86.96	67.68	35.28	7.82	0.8	1.9	0.38	0.77	7.1	0.441694	0.367539	-0.352643	0.744584	-4.51831	0.000155483	-3.74051	1.94e-06
Capana11g001334	1.99	0.06	1.92	4.05	14.71	2.38	108.04	59.47	193.67	32.94	29.27	20.2	2.41134	0.0255641	-2.13167	8.25e-07	1.9696	0.00191096	6.5207	4.43e-14
Capana02g002775	26.89	22.68	37.17	41.06	56.07	34.25	0	0.2	0	0	0.18	0.18	0.613588	0.0413704	0.840671	0.730632	-8.54472	8.33e-53	-8.7577	2.53e-31
Capana08g000628	154.45	216.26	126.68	155.15	120.35	97.03	0.11	0.91	0.14	0.19	0.27	1.6	-0.394597	0.182665	0.803482	0.49063	-7.50116	7.58e-28	-8.7167	5.48e-37
Capana08g000691	12.31	3.85	35.46	37.24	25.99	19.75	29.23	26.56	27.11	120.6	116.51	104.93	0.698958	0.332872	2.04295	8.49e-43	2.04753	9.21e-14	0.699839	0.311905
Capana03g000103	13	13.46	11.88	10.2	27.23	11.77	9.87	12.44	14.13	162.95	169.2	92.26	0.372892	0.365897	3.53999	2.7e-32	3.11419	1.26e-12	-0.0566965	0.785575
Capana01g001577	11.83	124.21	18.02	4.55	15.43	16.69	0	0	0	0	0	0	-2.04097	0.0247361	NA	NA	-8.92282	9.11e-11	-10.7978	4.36e-12
Capana08g000853	0.58	0.17	1.75	1.33	3.73	0.04	2.32	10.54	2.41	24.9	11.72	3.1	1.03043	0.42458	1.37502	0.0748944	2.96934	0.0402131	2.62282	0.00419946
Capana07g000704	16.9	18.3	19.37	4.03	4.94	5.4	6.65	3.95	6.91	26.28	18.21	21.75	-1.90062	1.79e-22	1.9194	2.42e-10	2.2055	6.45e-19	-1.62391	1.66e-08
Capana10g000325	31.04	32.49	26.94	20.12	17.22	11.16	8.28	8.57	8.52	77.18	87.22	66.63	-0.881014	0.00136873	3.18466	3.38e-68	2.25636	1.6e-16	-1.81741	8.64e-30
Capana11g000719	24.28	18.8	28.1	19.37	16.42	12.36	0.62	2.19	0.28	0.54	0.58	0.79	-0.548279	0.0491789	-0.706921	0.398063	-4.65718	1.29e-40	-4.50761	1.3e-11
Terpenoid metabolism
Capana00g003085	56.47	78.12	44.82	104.7	107.35	128.14	3.23	8.05	2.98	1.71	4.09	1.68	0.944624	0.000265298	-0.935964	0.120839	-5.50949	1.93e-49	-3.63796	8.14e-15
Capana12g001743	4.01	16.49	9.19	21.48	28.05	29.22	1.78	2.46	1.8	2.45	1.76	2.37	1.43208	0.00404018	0.124997	0.716082	-3.57477	1.17e-46	-2.28363	2.87e-05
Capana09g000177	14.36	24.02	14.03	41.55	29.61	48.87	1.58	0.99	0.46	3.23	2.6	2.72	1.21973	0.000190077	1.50122	0.00308065	-3.80804	3.9e-43	-4.10266	6.88e-17
Capana04g002519	39.43	29.71	27.46	25.35	11.28	25.79	256.6	697.57	527.64	701.28	1313.83	620.14	-0.609223	0.117271	0.827487	0.0561476	5.39942	8.41e-37	3.95537	8.34e-23
Capana03g002170	412.61	84.09	319.84	165.21	54.72	81.73	956.17	2434.94	1136.83	5199.7	7540.1	3264.16	-1.4191	0.0271456	1.8176	3.65e-05	5.72867	1.12e-33	2.48847	5.17e-05
Capana01g003456	2.97	0.65	0.12	126.08	100.21	64.64	0	0.03	0	0	0	0	6.2936	1.12e-12	NA	NA	-14.517	2.71e-32	-7.07565	3.9e-05
Capana06g000615	198.83	1.49	31.98	4.99	0.34	0.55	319.94	799.32	561.13	19580.3	21772.5	12995.5	-5.28645	0.0021334	5.0122	3.83e-41	13.1765	3.36e-31	2.87344	0.0489147
Capana01g004038	1.62	0.11	0.2	43.87	41.83	32.02	0	0	0.03	0	0.06	0	5.94295	2.3e-12	0.749426	0.852634	-10.9088	2.83e-25	-5.66983	0.00210117
Capana00g003114	6.66	12.8	1.8	5.17	13.84	3.06	170.45	406.08	183.39	200.9	127.98	180.75	0.0731052	0.926019	-0.580323	0.134735	4.53705	6.19e-18	5.17594	1.54e-14
Capana02g002284	4.72	23.82	9.17	10.36	9.81	22.35	1.21	0.13	0.56	1.7	0.85	3.49	0.202083	0.752312	1.67068	0.0494114	-2.81079	1.23e-06	-4.29704	2.67e-07
Capana11g000422	5.45	5.3	6.04	21.56	24.47	27.77	10.7	12.39	10.69	5.31	16.18	9.77	2.15503	3.54e-36	-0.114474	0.774161	-1.238	0.00217673	1.02601	6.26e-10
Capana03g003272	27.68	12.16	21.62	127.82	111.73	50.4	4.51	32.31	6.9	31.15	68.85	33.31	2.25209	1.44e-06	1.60251	0.0207319	-1.11921	0.0146033	-0.474934	0.529292
Capana03g002084	216.29	206.57	202.83	990.93	815.7	992.57	106.77	150.27	119.37	121.49	110.16	109.93	2.18091	4.65e-49	-0.142683	0.4694	-3.03154	7.42e-85	-0.716668	0.000152206
Capana08g001599	113.1	163.36	107.25	459.82	306.29	391.38	63.29	72.91	58.91	54.6	50.1	45.9	1.61628	1.24e-09	-0.375894	0.0320935	-2.93963	6.81e-43	-0.959421	7.67e-05
Capana08g002208	41.32	48.58	51.86	153.01	102.66	104.74	33.53	38.78	34.7	14.26	12.63	17.2	1.36711	1.47e-08	-1.28168	2.64e-10	-3.02764	5.62e-33	-0.389233	0.0241792
Capana11g000601	54.98	35.97	91.7	101.08	80.53	60.33	321.2	641.83	404.39	570.9	626.8	524.67	0.42173	0.303031	0.329678	0.263585	2.83516	2.73e-32	2.92055	1.79e-11
Capana12g000159	16.16	15.67	23.12	12.35	15.48	9.82	30.58	28.7	32.98	69.32	76.22	109.54	-0.529853	0.0631027	1.46527	8.06e-10	2.76543	1.38e-22	0.763799	0.00105786
Capana04g001609	119.09	130.4	121.14	536.14	358.73	454.41	48.2	95.39	52.84	88.42	94.01	56.41	1.88534	9.31e-20	0.278609	0.425483	-2.49642	3.03e-19	-0.899744	0.0046459
Capana08g000598	7.62	12.7	6.59	6.96	5.38	7.26	6.61	7.82	7.71	22.95	34.77	26.5	-0.433129	0.212199	1.92445	2.5e-14	2.10557	1.1e-15	-0.26388	0.44315
Capana06g002539	22.43	15.84	22.11	41.29	23.64	30.45	58.38	70.28	77.2	150.57	174.22	108.49	0.678597	0.023943	1.07169	1.32e-05	2.18539	2.47e-13	1.7861	7.92e-15
Capana12g002313	30.6	26.2	28.82	34.55	37.59	29.94	147.9	116.4	150.21	74.12	74.79	92.39	0.270112	0.100933	-0.782115	6.68e-05	1.2458	1.18e-11	2.29197	2e-36
Capana10g000102	184.18	72.17	133.55	140.97	69.69	53.66	49.86	124.64	44.19	18.97	21.19	24.65	-0.54275	0.273537	-1.75903	2.45e-05	-2.02572	1.74e-07	-0.817152	0.116401
Capana01g000552	6.09	25.48	8.32	12.16	15.65	5.82	0.29	0.45	0.7	1.19	1.12	0.1	-0.220997	0.727403	0.7367	0.459131	-3.79831	2.6e-07	-4.76896	1.1e-11
Capana07g000601	7.6	9.48	4.17	1.35	0.7	1.44	0.19	0.55	0.62	437.25	345.54	655.67	-2.58688	1.04e-06	10.0278	8e-91	8.69703	1.15e-103	-3.9366	1.15e-09
Capana03g003392	69.22	72.75	112.68	50.07	64.96	79.4	0.04	0	0	0.07	0.04	0	-0.372357	0.211361	1.27578	0.694801	-10.8263	8.01e-35	-12.4987	1.56e-24
Capana07g002506	11.81	7.17	14.78	10.5	14.68	7.64	65.43	42.81	62.25	33.49	29.81	34.66	-0.0285297	0.941284	-0.800577	0.000413347	1.58357	1.86e-08	2.35284	8.29e-12
Capana00g004199	0.64	0.24	0	50.35	37.83	21.7	0.19	0	0	0.15	0.11	0.21	6.96648	2.1e-20	1.35675	0.490611	-7.86356	1.85e-36	-2.23872	0.366665
Capana01g001843	27.31	28.83	23.6	56.26	56.6	70.77	32.91	34.14	36.47	6.09	5.93	12.34	1.22411	6.93e-10	-2.09002	6.48e-09	-2.91053	4.34e-16	0.393853	0.0382015
Capana03g000791	78.65	195.89	57.36	125.2	84.5	244.83	6.24	5.83	5.26	8.64	17.86	9.35	0.481346	0.401759	1.04721	0.00334999	-3.66429	4.64e-15	-4.24409	2.53e-18
Capana12g002714	2.86	35.42	10.61	0.9	7.85	1.29	0.03	0.03	0.06	0.05	0	0	-2.2654	0.0248109	-1.21205	0.615227	-7.49146	1.35e-07	-8.57514	1.23e-14
Capana01g001841	11.14	14.42	10.64	3.3	4.09	3.51	3.06	1.92	1.59	3.51	2.4	5.62	-1.71062	1.96e-17	0.810629	0.05247	0.0856242	0.81312	-2.44736	4.76e-14
Capana04g000802	7.09	1.18	7.18	46.4	37.82	32.53	6.76	2.31	29.39	5.16	7.24	34.31	2.92877	2.33e-06	0.281217	0.815548	-1.31553	0.0462523	1.33167	0.156681
Capana08g001733	18.37	31.29	24.63	16.96	11.72	17.3	5.12	2.41	5.32	15.09	11.89	13.24	-0.669455	0.0287548	1.64586	1.04e-05	-0.188643	0.475979	-2.51524	8.26e-10
Capana10g002239	0.41	0.09	0.78	15.03	14.58	18.14	9.9	12.64	12.55	0.46	0.66	0.49	5.22207	5.08e-24	-4.44953	1.15e-22	-4.88917	1.37e-30	4.77965	1.64e-17
Capana08g002111	26.12	25.78	21.71	0.69	1.33	0.48	0	6.33	0.03	0.66	1.17	1.42	-4.86583	6.29e-37	-0.976291	NA	0.387496	0.51584	-3.51566	NA
Capana11g002125	0	0	0	100.13	92.75	114.29	0.15	3.07	0	0	0	0	13.9946	1.2e-31	-7.52256	0.0543479	-14.0843	5.06e-32	7.41832	0.00432225
Capana09g000386	0	0.04	0	126.94	114.3	113.87	0	0	0	0	0	0	13.2682	8.1e-29	NA	NA	-14.3195	2.97e-33	NA	NA
Capana00g000858	8.44	50.33	47.93	289.38	130.36	121.65	0	0	0	0	0	0	2.37165	0.000428197	NA	NA	-12.6125	2.09e-23	-10.0729	1.95e-12
Capana00g000857	10.69	72.32	67.26	151.21	68.69	71.86	0	0.11	0	0	0	0	0.985722	0.151533	NA	NA	-12.3937	6.48e-23	-10.2785	2.85e-13
Capana02g002125	0	1.29	23.28	126.6	61.44	58.82	0	0	0	0	0	0	3.34651	NA	NA	NA	-12.2316	1.99e-22	-8.70652	0.0258833
Capana02g002126	0.28	1.93	39.09	6.78	4.03	3.7	0	0	0	0	0	0	-1.49514	NA	NA	NA	-8.13741	7.64e-10	-9.4564	0.000885932
Capana01g000351	16.58	23.51	17.25	21.21	27.14	21.32	1.54	1.67	1.42	5.92	3.12	2.69	0.301151	0.178569	1.34215	0.0019929	-2.56459	5.21e-13	-3.61642	1.21e-37
Capana00g003194	98.74	147.74	112.01	217.24	109.33	270.22	20.77	53.14	24.72	36.08	36.74	28.81	0.759554	0.0464883	0.0394259	0.918242	-2.55257	7.72e-13	-1.84603	9.4e-06
Hormones metabolism
Capana00g003117	19.85	17.95	20.41	4.78	4.87	5.78	5.87	3.46	5.08	18.03	17.51	24.99	-1.89493	2.4e-28	2.07001	7.62e-13	1.97413	6.15e-17	-1.99831	1.68e-14
Capana01g001914	15.27	15.01	13.65	0.14	0.33	0.1	0	0	0.25	8.55	8.6	12.98	-6.24201	2.19e-18	6.88349	8.97e-10	5.72065	2.04e-13	-7.40983	6.01e-12
Capana03g002653	31.78	40.93	33.79	0	0	0	0	0	0	30.13	31.69	25.26	-10.1797	4.84e-17	9.76748	1.41e-15	9.91307	4.23e-16	-10.0428	1.85e-16
Capana10g001370	28.01	15.66	21.45	3.86	4.08	2.2	0.08	0.08	0.04	0.82	0.55	0.57	-2.67258	3.47e-13	3.26294	0.000607115	-2.3745	1.1e-07	-8.31843	6.41e-30
Capana07g000715	3.46	5.24	1.89	21.42	19.18	18.48	21.47	19.64	18.27	2.66	2.08	2.03	2.50629	8.82e-10	-3.13223	3.78e-20	-3.11762	1.06e-21	2.5087	3.67e-09
Capana07g001126	14.91	18.32	9.26	2.7	4.03	2.66	0.21	0.16	0.19	0.79	1.07	2.31	-2.15833	1.53e-09	2.87264	9.5e-05	-1.16725	0.0233113	-6.20909	5.54e-31
Capana05g001014	10.49	12.68	11.39	2.92	4.4	2.3	20.19	8.1	14.45	15.21	14.21	17.54	-1.82787	3.58e-07	0.13581	0.727108	2.29263	1.29e-10	0.322546	0.433583
Capana06g001979	3.23	2.45	3.72	18.56	16.02	7.35	21.64	3.76	14.83	4.78	4.05	6.41	2.16858	2.08e-05	-1.40021	0.0298675	-1.4508	0.0028038	2.11414	0.00246357
Capana03g000299	50.85	113.73	52.4	4.95	19.25	17.81	0.86	0.46	1.29	7.03	4.12	8.45	-2.34891	3.49e-05	2.90333	7.17e-09	-1.0937	0.0461059	-6.35681	8.89e-36
Capana09g000285	39.54	42.06	37.74	10.19	21.2	17.77	2.37	0.76	2.49	1.66	1.49	3.37	-1.26104	3.66e-05	0.214181	0.736308	-2.90962	1.56e-10	-4.39188	4.12e-25
Capana03g003343	12.23	45.26	38.24	67.47	98.54	171.39	0.42	1.09	0.57	0	0	0.09	1.84012	0.000937601	-4.46903	0.00861596	-11.8024	5.55e-21	-5.5057	7.28e-17
Capana05g001701	11.46	5.88	5.83	22.42	24.06	12.76	6.8	3.91	5.14	19.71	14.26	34.71	1.3666	0.00140987	2.11468	5.99e-07	0.220572	0.607755	-0.532279	0.229768
Capana03g003488	12.41	19.46	10.81	6.49	8.81	6.93	1.78	1.02	0.44	8.29	5.74	7.2	-0.919068	0.00355853	2.71451	1.13e-07	-0.0621133	0.821639	-3.70614	6.14e-12
Capana08g001238	29.11	270.69	28.08	2.53	26.8	12.53	0.16	0.15	0	0.39	0.28	1.17	-2.94639	0.00357033	2.55554	0.0617348	-4.49674	2.74e-07	-10.0223	NA
Capana10g000854	20.33	3.46	54.42	4.79	5.49	5.96	11.53	3.86	9.9	8.6	9.32	14.49	-2.25717	0.00476284	0.357219	0.421269	0.999429	0.000627995	-1.61202	0.0568968
Capana00g003643	41.82	7.9	28.16	79.66	73.93	70.41	599.25	636.94	846.33	99.76	81.06	189	1.53572	0.0057401	-2.49511	1.92e-12	0.728642	0.036822	4.75827	1e-17
Capana06g002018	43.4	75.44	45.58	16.64	22.01	37.48	8.62	5.76	7.44	8.99	6.19	12.49	-1.08717	0.00694048	0.341829	0.378281	-1.4571	0.000733185	-2.89773	2.57e-17
Capana08g002649	5.84	21.61	2.11	27.26	57.67	36.23	0	0	0.72	0	0	0	2.06278	0.00845026	-2.98581	0.452616	-10.384	1.5e-16	-5.32993	0.000173602
Capana07g001815	50.5	37.05	48.79	31.01	28.3	33.98	9.6	12.8	7.61	8.08	8.91	17.93	-0.530311	0.00998285	0.215164	0.590397	-1.41347	8.02e-05	-2.16707	1.04e-14
Capana03g002049	45.04	38.03	37.4	27.97	32.24	26.18	3.1	1.37	1.02	5.65	5.29	2.83	-0.463628	0.012667	1.33033	0.0290209	-2.64483	3.71e-16	-4.44747	2.61e-25
Capana06g001465	50.89	98.21	231.9	10.56	49.89	50.89	0	0	0.16	0	0.15	0.07	-1.76223	0.0133129	0.477164	0.877254	-8.99089	1.16e-17	-11.174	2.49e-20
Capana12g001078	39.65	36.03	42.31	25.03	31.69	30.1	8.99	10.09	10.16	5.56	6.93	5.85	-0.423944	0.0168216	-0.676107	0.0120445	-2.24217	7.4e-23	-1.99599	9.93e-26
Capana00g003839	28.54	8.3	35.3	12.65	19.01	6.98	429.31	739.63	534.34	669.92	667.56	404.39	-0.892239	0.139743	0.0294523	0.923748	5.4998	5.71e-43	4.57773	4.14e-18
Capana06g001308	7.64	157.91	101.04	86.15	297.99	374.05	0	0.81	0.34	0.1	0.42	0.31	1.53063	0.0920569	-0.476533	0.764361	-9.83758	6.55e-39	-7.83679	3.45e-12
Capana08g002278	7.24	0.2	0.84	18.24	9.02	4.12	860.17	552.06	832.79	541.47	603.71	890.62	1.9327	0.0786338	-0.142354	0.619205	6.02424	2.4e-32	8.10079	NA
Capana05g000287	282.29	104.8	1055.33	300.42	365.06	433.89	63.36	229.84	90.84	24.62	25.6	43.44	-0.380022	0.603278	-2.04029	3.85e-05	-3.54835	3.98e-32	-1.89327	0.0198517
Capana08g002318	17.82	43.31	14.5	46.28	54.9	39.97	297.86	104.75	286.14	6.36	6.78	3.44	0.924584	0.0399669	-5.37644	1.33e-33	-3.08611	5.75e-23	3.20333	1.08e-08
Capana05g000373	24.28	20.25	22.07	32.57	28.15	21.79	5.14	4.94	4.65	3.59	3.45	5.47	0.326236	0.142732	-0.238384	0.403779	-2.71693	3.57e-21	-2.16031	2.2e-35
Capana09g001771	0	0	0.26	0.77	0.12	0.21	22.13	11.38	15.68	32.89	21.36	16.81	2.08591	0.315709	0.530407	0.177048	6.14546	1.74e-19	7.58961	1.7e-11
Capana00g000130	5.49	1.36	4.9	1.95	2.26	0.62	20.29	12.21	16.14	22.31	27.45	22.75	-1.28061	0.109105	0.5753	0.046226	3.93211	6.39e-18	2.06179	0.000245777
Capana04g001744	15.86	12.45	8.18	9.98	9.88	8.64	0.89	5.86	0.69	1.37	0.45	0.84	-0.339755	0.270773	-1.49228	0.0962076	-3.41313	1.2e-16	-2.27725	0.00494659
Capana02g003021	1.18	0.4	16.06	18.6	37.18	4.86	0.24	0.13	0.03	0.25	0.12	0	1.7877	0.130099	-0.118147	0.938432	-7.34381	5.81e-16	-5.44257	2.42e-05
Capana11g001030	12.24	29.4	14.96	16.93	22.72	26.07	14.61	17.11	13.8	2.64	1.87	4.3	0.239103	0.545387	-2.37217	1.62e-11	-2.89453	6.01e-15	-0.297942	0.447227
Capana10g001629	26.51	12.42	8.46	17.73	17.22	7.68	0.12	0	0	0	0	0	-0.140094	0.802519	NA	NA	-9.62336	8.84e-14	-8.62044	9.44e-11
Capana11g001454	34.47	7.39	28.01	50.42	29.77	25.66	0.71	1.2	0.29	3.13	3.91	1.01	0.613211	0.299322	1.86671	0.0165661	-3.71627	4.72e-13	-4.97155	5.7e-12
Capana08g001103	5.49	41.23	4.01	18.2	18.77	79.19	0	1.52	0.16	0	0	0.15	1.22981	0.206936	-3.39862	0.198784	-9.49492	6.75e-12	-4.89288	0.000242855
Capana04g000551	11.03	13.7	13.05	10.7	14.06	19.48	48.26	72.57	44.55	52.95	48.54	50.33	0.248926	0.390116	-0.126426	0.61249	1.77988	1.8e-11	2.14661	3.85e-15
Capana00g001638	10.85	3.69	25.06	10.87	14.43	12.68	73.28	83.9	57.48	24.26	37.03	24.94	-0.0492782	0.937793	-1.31852	7.01e-07	1.18495	2.4e-06	2.45486	7.53e-05
Capana05g000895	7.55	17.16	4.89	9.63	11.97	11.39	3.98	2.45	3.52	0.69	3.23	0.66	0.181321	0.701843	-1.12081	0.0799429	-2.84925	3.05e-06	-1.55586	0.00247096
Capana02g001579	2.48	5.11	0.4	0.6	1.09	0.33	0	0.42	0.61	16.04	21.96	0.28	-1.96159	0.055296	5.19309	4.11e-05	4.24809	0.000206395	-2.91823	0.0231998
Capana04g001165	22.64	27.18	30.49	9.68	29.53	15.57	4.08	2.49	3.86	12.17	9.32	12.08	-0.538142	0.213064	1.68549	3.92e-08	-0.700061	0.106114	-2.92836	3.06e-24
Capana03g000117	59.27	56.47	49.36	24.3	48.9	19.66	12.21	10.21	15.48	74.75	58.06	24.38	-0.815986	0.0325329	2.05104	1.37e-06	0.764465	0.128243	-2.10602	1.46e-19
Capana04g000406	9.78	23.38	17.22	4.76	12.11	6.9	0.55	0.82	0.23	1.74	7.09	7.26	-1.06338	0.0259068	3.33197	3.72e-06	-0.561272	0.35931	-4.96916	1.58e-18
Capana00g004127	25.79	51.82	26.47	5.04	6.35	8.45	2.14	1.72	2.86	5.77	6	11.18	-2.36743	2.54e-10	1.76823	4.68e-06	0.213661	0.568978	-3.93469	1.72e-23
Capana04g002497	73.35	108.97	91.4	29.1	39.21	35.54	4.96	7.68	5.69	27.06	32.79	33.8	-1.37765	1.26e-09	2.35028	5.99e-18	-0.146952	0.482987	-3.88431	3.95e-42
Capana02g001847	25.86	23.25	33.34	16.46	13.58	15.27	4.71	6.56	3.61	5.55	4.21	5.08	-0.846118	0.000104834	-0.00751091	0.980549	-1.60545	1.99e-15	-2.45295	1.1e-15
Capana04g000218	9.9	22.51	4.09	3.26	4.35	2.97	0	0.13	0.13	1.11	0.72	0.35	-1.76014	0.00793005	3.06285	0.0523682	-2.27125	0.000481456	-7.10843	3.04e-08
Capana11g000105	6.74	22.74	9.71	9.54	19.19	15.87	0.87	3.57	1.11	0.55	0.71	0.3	0.209769	0.681841	-1.82891	0.00719142	-4.82608	8.22e-31	-2.80277	3.83e-05
Capana08g002648	0.33	13.65	0	12.79	12.96	7.83	0	0	0	0	0	0	1.30166	0.391957	NA	NA	-8.53045	3.45e-11	-7.0752	0.0096389
Capana04g000259	11.36	5.22	9.49	8.51	4.55	2.02	41.94	25.72	37.17	50.31	69.13	50.72	-0.773979	0.179893	0.697704	0.00829813	3.50125	5.83e-13	2.02456	4.1e-08
Cell signaling
Capana06g001571	26.17	33.1	20.1	2.79	5.25	5.75	4.35	1.62	3.67	7.14	6.74	8.52	-2.50134	1.49e-12	1.2164	0.00238921	0.698809	0.0397861	-3.02535	7.66e-13
Capana01g000809	31.29	61.85	22.23	124.28	95.6	205.86	7.53	2.95	6.64	0.78	0.74	3.64	1.90939	4.87e-05	-1.73347	0.0112089	-6.36302	4.1e-24	-2.73556	1.05e-07
Capana12g001526	22.16	9.95	22.57	46.32	40.13	39.76	129.35	116.92	115.59	23.38	22.78	44.85	1.22094	0.000765311	-1.99333	1.5e-10	-0.466899	0.148493	2.74277	7.92e-15
Capana08g001380	10.08	0	0.12	114.58	159.61	320.12	149.52	205.79	255.03	0.67	1.44	0.94	5.8677	0.00375742	-7.65233	1.47e-77	-7.60735	3.6e-47	5.92006	0.00293765
Capana05g001982	45.16	39.78	38.18	160.92	132.96	168.04	267.14	314.39	386.42	118.02	134.75	120.3	1.92645	2.14e-28	-1.37727	8.21e-12	-0.305524	0.0636181	2.99118	3.95e-47
Capana05g002100	0.16	0.86	0.5	15.15	20.32	10.78	1.38	3.08	1.66	0.11	0.12	0	4.9669	1.17e-19	-4.71899	5.48e-08	-7.62621	9.57e-28	2.03927	0.00498203
Capana05g001091	0	0	0	37.98	37.19	43.79	52.16	64.81	62.98	0	0	0	10.5301	2.45e-18	-11.2222	1.51e-20	-10.6199	1.48e-18	11.1244	3.14e-20
Capana02g001705	4.77	5.13	4.16	11.49	11.53	10.77	7.96	6.41	7.41	2.13	1.72	0.48	1.28301	2.36e-12	-2.33215	5.46e-06	-2.96066	2.86e-09	0.648553	0.00465958
Capana09g000081	2.93	3.11	1.99	10.51	14.92	9.22	0.7	0.54	0.65	0.34	0.24	0.04	2.12806	4.04e-11	-1.58822	0.0727748	-5.77962	3.26e-27	-2.07513	2.23e-06
Capana08g000346	19.42	18.72	14.66	33.93	36.1	33.63	122.26	92.79	112.92	32.21	30.72	33.15	0.991642	5.79e-08	-1.77273	3.81e-22	-0.105711	0.454145	2.65173	3.73e-34
Capana12g000209	2.02	4.52	1.36	8.81	15.33	13.97	2.15	25.3	6.06	0.76	0.88	0.21	2.29545	4.32e-06	-4.1873	7.05e-07	-4.3644	1.98e-18	2.10082	0.0160457
Capana02g001025	38.11	29.43	27.21	55.68	51.3	77.39	21.67	13.99	18.3	11.21	12.44	18.41	0.978452	0.000159651	-0.360845	0.222503	-2.12854	2.75e-13	-0.795532	0.00254943
Capana06g002524	12.66	18.33	17.58	8.63	10.19	10.11	2.79	4.25	2.61	8.8	5.78	7.08	-0.726716	0.000911265	1.16389	0.000349226	-0.413385	0.0882539	-2.31531	8.31e-14
Capana01g001904	45.6	46.85	40.83	32.23	27.25	31.27	31.77	2.09	22.77	86.72	92.68	93.72	-0.536481	0.00154015	2.27084	0.00125777	1.59425	1.17e-23	-1.21788	0.119851
Capana02g000158	8.65	4.93	7.02	16.46	10.56	9.81	48.9	26.13	43.53	13.79	9.71	17.57	0.853821	0.0151894	-1.53024	5.9e-06	0.16304	0.632773	2.54119	6.23e-13
Capana03g004588	7.33	0.82	3.54	11.69	27.42	5.82	1.87	0.58	3.82	1.06	0.89	0.12	1.94399	0.0180683	-1.59697	0.0786992	-4.43247	9.34e-09	-0.8823	0.331917
Capana06g001111	8.58	3.12	6.73	3.5	10.88	8.49	67.4	54.07	62.35	54.59	55.71	95.03	0.320826	0.565121	0.157893	0.576443	3.17077	1.48e-12	3.33424	1.46e-17
Capana10g001609	14.44	17.87	8.29	4.17	10.8	5.67	15.13	4.53	9.73	44.97	53.54	13.69	-0.958409	0.0406681	1.93237	0.000654658	2.44552	1.16e-05	-0.448925	0.386822
Capana07g000068	30.67	26.15	17.96	7.41	17.55	15.89	0.89	3.45	1.51	4.64	5.27	4.04	-0.856316	0.0323614	1.24728	0.0181189	-1.54634	5.1e-05	-3.65653	2.2e-12
Capana10g001362	15.81	25.78	14.99	8.75	8.98	17.29	5.96	2.01	4.13	3.91	3.87	5.38	-0.66854	0.0868751	0.120982	0.782952	-1.41051	0.000122943	-2.20962	1.8e-06
Capana06g000284	20.3	30.21	13.56	9.65	35.1	9.87	22.74	4.95	27.68	121.75	171.66	22.38	-0.216034	0.715286	2.51253	0.000548537	2.53599	0.000565418	-0.194309	0.758434
Capana08g002488	16	17.06	11.64	9.19	13.94	10.73	5.17	5.6	8.36	50.58	34.1	9.01	-0.379801	0.193929	2.29019	9.32e-05	1.47161	0.0119235	-1.20574	0.000441525
Capana08g000070	3.27	2.22	5.07	4.21	4.17	4.03	30.2	16.34	23.61	4.9	4.43	2.72	0.247264	0.504619	-2.54293	8.33e-14	-0.0389649	0.897275	2.74839	9.99e-12
Capana05g002211	8.37	20.52	13.39	5.03	11.17	5.03	2.08	0.5	1.62	5.55	9.83	6.21	-0.975312	0.039662	2.36307	4.64e-06	0.0282726	0.947096	-3.31661	8.62e-09
Capana06g000398	2.78	3.16	2.75	47.85	71.42	60.09	99.03	231.84	89.71	429.34	430.93	231.1	4.38742	6.83e-76	1.37158	0.0015448	2.60861	4.62e-17	5.61501	1.34e-38
Capana02g001716	21.46	44.51	26.62	0.27	2.14	2.07	0.02	0.03	0	0.12	0.11	0.06	-4.34597	1.58e-10	2.46415	0.0846219	-3.96661	1.96e-06	-10.7948	1.32e-31
Capana12g001437	25.34	25.32	30.01	12.3	14.44	14.88	38.49	35.27	35.04	50.5	60.14	75.73	-0.934954	6.4e-08	0.774521	0.000326282	2.16546	7.85e-22	0.448052	0.00492863
Capana00g003379	93.04	122.5	90.67	50.32	47.72	53.8	3.36	7.56	3.17	19.18	16.85	6.16	-0.991021	9.41e-08	1.57893	0.00421586	-1.84472	1.19e-05	-4.42549	1.67e-28
Capana10g002124	12.61	29.61	16.25	64.32	88.99	65.34	32.64	38.89	52.56	21.9	14.56	17.31	1.92623	2.61e-07	-1.20814	5.3e-05	-2.0182	1.76e-14	1.10312	0.00758459
Capana02g002452	137.87	362.96	99.29	23.76	16.05	49.69	5.96	3.79	8.63	2.64	11.48	13.18	-2.71629	8.32e-06	0.569288	0.381602	-1.7126	0.00941184	-5.01284	1.56e-18
Capana07g001653	38.81	33.47	18.32	424.96	256.67	27.25	10.66	68.1	70.67	593.31	507.94	221.57	2.99002	0.000194545	3.14339	5.85e-07	0.901908	0.244855	0.73779	0.270629
Capana12g002655	3.82	1.84	7.62	10.71	20.1	24.68	5.26	2.13	7.52	0.16	0.23	1.5	2.07289	0.000372966	-2.97853	0.000619136	-4.86831	1.48e-10	0.181219	0.791945
Capana00g002532	1.49	1.46	1.35	2.77	2.82	2.67	5.78	26.93	10.88	42.96	38.71	40.37	0.961809	0.00337301	1.48038	0.00359687	3.89076	4.23e-87	3.36116	2.77e-08
Capana03g000145	85.53	70.11	76.89	98.24	98.25	99.71	284.56	386.64	254.78	295.88	296.89	385.35	0.366384	0.00833776	0.0761153	0.752201	1.72754	1.32e-23	2.01015	1.97e-18
Capana04g000307	32.14	27.01	28.87	22.08	23.38	27.93	10.82	15.69	12.18	3.03	3.14	4.44	-0.242483	0.231613	-1.87004	3.12e-07	-2.78875	2.91e-20	-1.16913	2.74e-06
Capana08g000980	0.04	0	0.27	0.73	0.24	0.03	0.08	0	0.47	36.46	26.28	6.84	1.72687	0.304465	6.97535	3.73e-07	6.15693	1.03e-12	0.876244	0.679646
Capana06g000891	2.47	7.55	2.03	2.23	1.97	2.88	8.62	16.73	10.26	8.66	9.85	10.11	-0.732968	0.250726	-0.318959	0.353476	2.00955	1.77e-10	1.58231	0.00953668
Capana06g001506	72.63	34.77	10.16	31.42	77.85	11.16	226.99	52.6	176.06	583.09	510.59	205.97	0.0432212	0.957842	1.51226	0.00587152	3.43837	1.54e-07	1.97259	0.00767893
Capana02g002479	28.77	72.26	104.24	19.35	58.06	1.75	19.76	190.5	73.73	2425.96	1635.02	325.06	-1.36377	0.16023	3.94404	0.00025604	5.79976	8.17e-06	0.48328	0.533073
Capana08g000387	1.38	1.07	2.9	1.09	1.92	0.44	14.08	14.17	14.99	5.13	8.66	4.38	-0.620768	0.420686	-1.25411	0.000214051	2.40162	9.85e-05	3.03015	1.43e-12
Capana01g000175	12.44	6.45	5.86	15.32	17.71	5.44	50.83	26.15	42.9	246.95	246.92	10.29	0.649625	0.22593	2.07149	0.06147	3.7144	0.0013673	2.29323	3.52e-08
Capana06g002562	13.77	9.35	5.69	4.97	24.45	1.68	17.18	2.4	30.09	102.7	133.87	13.67	0.115967	0.894915	2.33401	0.0457419	3.0152	0.0155633	0.802592	0.31045
Capana09g001251	2.84	0.22	0.58	0.65	4.44	0.03	0.6	0.25	2.39	30.36	14.53	0.42	0.485758	0.736582	3.80473	0.0102526	3.15596	0.0861344	-0.149913	0.895047
Capana02g002478	9.05	1.11	27.68	14.35	25.98	0.24	3.24	17.94	9.1	560.01	153.77	0.21	0.106017	0.935996	4.55509	0.0143417	4.1451	0.0501055	-0.305366	0.761471
Transcription factor
Capana03g000560	32.09	32.45	28.9	216.39	186.56	204.48	0	0.19	0.12	0.54	0.98	0.85	2.71999	2.01e-82	2.90486	0.00804531	-8.00256	3.67e-168	-8.18021	6.82e-33
Capana05g001459	26.19	27.48	26.07	0.11	0.41	0.19	0.05	0.1	0.05	24.02	24.35	18.05	-6.75935	3.24e-62	8.43424	7.62e-28	6.52149	5.15e-47	-8.68351	5.98e-31
Capana01g003977	9.46	11.65	12.08	2.69	4.37	4.31	2.88	2.13	2.05	1.38	2.28	2.57	-1.51256	5.44e-06	-0.183046	0.744355	-0.873774	0.0852439	-2.21864	1.31e-09
Capana01g003985	6.34	3.83	9.23	0	0	0	0	0	0	36.02	29.1	68.15	-7.99486	4.02e-09	10.6463	3.69e-17	10.7942	1.89e-17	-7.85286	9.54e-09
Capana01g003987	13.04	2.57	7.94	0	0	0	0	0	0	60.39	74	71.01	-8.60222	3.34e-09	11.5945	5.51e-22	11.7403	1.39e-22	-8.45558	6.15e-09
Capana02g002032	6.93	6.33	6.31	9.12	23.23	19.26	23.38	42.42	20.04	7.48	6.76	11.52	1.41265	0.000141257	-1.74048	2.51e-06	-0.996362	0.0140326	2.14916	3.02e-10
Capana06g000650	11.43	6.77	17.19	168.89	140.08	189.77	27.73	42.28	29.97	6.8	5.93	8.1	3.83196	1.41e-24	-2.26547	1.68e-14	-4.57765	2.55e-84	1.51383	0.000252056
Capana08g002478	12.52	3.79	21.51	5.14	3.99	3.39	0.73	0.63	1.01	1.01	0.7	1.31	-1.58319	0.0120878	0.345395	0.591085	-2.04161	5.13e-06	-3.97671	9.18e-09
Capana00g001997	20.27	23.44	26.91	0	0	0	0	0	0	38.35	57.28	27.01	-10.0492	1.54e-16	10.7218	8.61e-18	10.866	3.48e-18	-9.91108	5.38e-16
Capana00g004126	21.25	54.94	29.46	3.73	7.36	8.17	0.12	0	0.55	3.37	3.72	10.14	-2.42798	4.96e-07	4.67306	2.26e-06	-0.157975	0.790352	-7.26824	1.01e-18
Capana04g002496	93.66	125.88	103.16	39.48	54.86	43.22	5.44	11.06	6.97	39.77	40.02	45.61	-1.21124	6.44e-09	2.41376	4.18e-15	-0.129431	0.511952	-3.76466	3.57e-31
Capana04g002498	51.49	75.33	64.07	17.5	31.63	23.53	3.98	7.4	3.3	16.67	19.37	23.13	-1.37385	2.57e-06	2.00842	2.17e-07	-0.293219	0.332257	-3.68554	1.67e-22
Capana02g000614	9.61	14.54	6.2	1.2	1.11	0.74	0.19	0.41	0.23	13.22	15.27	5	-3.30528	7.97e-13	5.33668	7.08e-17	3.46958	3.2e-11	-5.18047	1.22e-17
Capana02g001947	7.27	70.16	17.33	0	0.29	0.44	0	0	0	0.1	0	0	-6.93291	3.59e-11	NA	NA	-2.77884	0.294359	-10.559	2.46e-12
Capana03g002644	19.69	27.04	12.33	42.47	39.35	43.46	24.08	5.91	20.49	0.34	0.65	0.86	1.10772	0.000604018	-4.77453	5.21e-14	-6.08753	9.91e-65	-0.209242	0.716453
Capana03g004551	28.3	9.18	97.41	0	0	0	0	0	0	0.39	0	0	-11.1952	9.11e-14	2.61867	0.510068	2.76724	0.486349	-11.0507	1.47e-13
Capana08g001640	130.26	81.24	145.72	17.38	56.83	32.69	28.47	6.98	14.37	3.56	2.29	1.08	-1.73032	0.000241246	-2.84484	4.86e-06	-3.94045	3.95e-12	-2.82493	8.96e-08
Capana08g002086	10.96	27.34	13.86	1.96	3.32	4.59	1.76	1.2	1.16	1.88	1.18	2.02	-2.3721	8.96e-07	0.301302	0.514726	-0.958476	0.0412602	-3.64401	5.37e-15
Capana01g001636	23.49	16.99	24.97	51.84	36.53	45.93	109.62	169.54	176.42	45.21	41.63	39.79	1.05425	5.38e-05	-1.84938	3.97e-14	-0.0811613	0.690573	2.81524	1.16e-22
Capana03g000138	5.22	0.31	1.35	0.12	0	0	66.4	115.93	74.24	248.55	276.94	495.19	-6.104	0.000480831	1.98886	2.72e-08	13.3279	3.83e-27	5.23303	3.32e-11
Capana08g000393	55.22	26.38	37.57	201.37	134.64	189.7	184.06	254.28	163.66	80.54	77.49	48.45	2.15801	5.47e-10	-1.54657	1.21e-07	-1.34633	2.75e-06	2.35366	1.33e-11
Capana09g002063	39.75	33.21	40.67	101.59	61.87	90.82	199.74	106.87	188.74	27.04	26.53	23.54	1.18114	9.07e-06	-2.68435	1.66e-20	-1.71871	1.59e-11	2.14067	2.46e-12
Capana10g002379	3.22	55.32	5.96	0.18	1.05	0.46	0.11	0	0.05	0.05	0	0.1	-5.22178	9.1e-07	-0.207664	0.931726	-3.57837	0.0098713	-8.62376	1.61e-10
Capana02g001064	25.83	24.17	14.89	5.6	11.48	5.75	9.57	1.85	6.49	1.4	1	1.66	-1.49125	0.000238352	-2.14194	0.000784784	-2.48611	1.05e-07	-1.84022	0.00182415
Capana03g000409	7.59	26.91	9.5	1.7	6.6	4.95	0.15	0.14	0.18	0.12	0	0	-1.70862	0.00927635	-1.95483	0.293751	-6.74617	9.83e-10	-6.53407	1.09e-18
Capana03g001891	17.41	55.67	12.75	1.56	5.27	3.64	2.36	1.02	1.47	1.98	3.12	2.01	-3.00769	8.76e-06	0.550015	0.302073	-0.563142	0.310861	-4.12939	3.63e-10
Capana06g001366	26.6	20.03	30.04	51.65	61.84	79.79	6.66	0.89	3.99	0.11	0.06	0.74	1.35016	6.47e-07	-3.67513	0.00033341	-7.7389	2.5e-36	-2.71622	2.32e-05
Capana09g000876	4.78	1.46	3.97	1.47	0.99	0.17	2.99	1.52	3.75	14.7	17.05	13.43	-1.95602	0.0167789	2.45064	1.42e-11	4.12737	5.69e-12	-0.290982	0.622032
Capana09g001260	0.26	0.07	0.07	0.08	0	0	14.48	2.26	9.2	11.73	24	9.68	-2.50255	0.254839	0.809055	0.206697	9.31809	3.47e-13	5.99616	8.72e-10
Capana01g002803	3.18	5.11	4.32	18.04	11.83	7.41	68.93	74.01	66.33	71.15	58.41	58.08	1.58386	0.000330809	-0.159301	0.368142	2.34045	3.87e-11	4.07385	1.79e-63
Capana02g000680	4.47	1.3	2.7	13.15	2.52	1.9	5.2	13.52	5.5	67.68	55.72	60.82	1.06814	0.234428	2.92309	6.46e-13	3.40084	5.11e-07	1.53026	0.0184336
Capana02g003053	9.88	8.06	9.61	19.52	23.63	19.96	1.42	3.1	1.25	12.12	4.77	0.35	1.21138	9.55e-10	1.57566	0.102538	-1.86802	0.0335	-2.23968	3.74e-07
Capana02g003339	4.77	4.04	4.03	16.42	13.27	7.89	5.69	1.67	3.93	1.97	1.48	2.7	1.56555	7.04e-06	-0.876097	0.0991108	-2.60419	7.34e-11	-0.168636	0.734117
Capana09g000676	1.44	0.18	1.68	14.08	5.3	0.49	7.63	39.64	8.92	13.88	8.34	1.03	2.60072	0.0255863	-1.27792	0.142555	0.230075	0.834325	4.09966	4.78e-06
Capana02g000909	21.43	24.63	22.6	7.72	11.4	12.06	19.27	36.96	20.88	83.73	62.97	46.29	-1.11649	1.75e-06	1.32022	0.000200478	2.6316	2.57e-17	0.183902	0.568474
Capana09g000311	2.11	9.55	4.28	0.07	0.62	0.57	16.03	22.9	16.98	72.83	63.8	96.95	-3.62143	1.55e-05	2.06019	5.44e-15	7.47588	5.37e-64	1.8268	0.00105027
Capana02g002988	2.92	0.18	1	5.95	7.85	2.06	15.52	0.61	8.38	9.6	15.1	12.14	1.95422	0.0412238	0.588932	0.474999	1.22318	0.0183728	2.59684	0.027246
Capana00g004709	191.49	217.94	139.51	41.15	52.04	56.33	785.61	475.88	1170.2	1855.62	1525.03	2413.01	-1.856	5.4e-14	1.25202	0.000491379	5.27977	2.97e-99	2.16367	1.79e-08
Capana06g002136	0.34	2.05	0.54	0.11	0.08	0.15	0	0	0	10.6	12.17	16.69	-3.07167	0.0149423	9.5432	1.59e-14	6.85217	3.13e-17	-5.77747	0.00222439
Capana08g000973	39.77	29.74	33.93	8.11	9.62	11.83	12.79	3.85	16.01	93.73	81.88	117.92	-1.78406	1.12e-11	3.16841	2.12e-11	3.30907	2.85e-36	-1.64696	0.00176802
Capana10g000711	189.88	212.58	143.52	59.9	60.64	54.66	31.61	14.68	26.23	142.78	125.68	165.33	-1.6205	1.99e-15	2.57979	4.47e-16	1.31281	1.76e-13	-2.89565	1.16e-16
Capana10g000712	108.32	122.28	73.35	37.08	39.85	32.84	16.48	10.15	16.08	87.63	74.99	87.53	-1.45013	8.82e-09	2.54952	9.42e-24	1.19358	3.17e-12	-2.81485	1.72e-18
Capana11g002005	176.18	2.39	152.55	1195.18	562.97	954.45	1205.16	1959.51	1578.72	881.71	950.25	575.92	3.04729	0.0207115	-0.980786	0.000661266	-0.171179	0.621539	3.8581	0.00293615
Capana12g000846	0	0	0.29	23.43	24.09	21.27	30.22	24.03	24.93	0	0	0	7.91551	7.95e-14	-10.0706	1.7e-16	-9.86185	5.19e-16	8.11822	3.29e-14
Capana12g000908	1.72	0	1.57	162.97	76.34	98.06	225.74	114.8	194.69	35.51	33.01	64.23	6.68254	1.55e-18	-2.01239	6.5e-08	-1.34191	0.000933818	7.34954	7.14e-25
Capana12g000930	106.2	103.39	106.36	11.29	5	11.15	8.79	0.16	0.76	108.92	135.69	99.15	-3.50808	7.05e-24	5.14701	0.000115447	3.6521	1.29e-24	-5.00808	1.07e-06
Capana03g000494	8.22	7.17	6.75	15.15	17.17	17.61	28.69	29.65	30.06	27.4	32.95	21	1.1921	4.69e-07	-0.122165	0.626488	0.704834	0.00649879	2.01277	6.6e-20
Capana03g000696	0.12	4.24	0.44	0	2.16	0	155.54	3.47	91.28	145.3	144.05	24.64	-1.12874	0.594954	0.328079	0.804679	7.18897	0.00240418	5.72123	0.000507094
Capana03g001055	12.36	26.08	8.15	0	0.66	0.26	0	0	0.11	0	0.05	0.34	-5.61367	2e-11	1.87702	0.491429	-1.21371	0.534951	-8.70955	1.85e-13
Capana03g001450	2.2	2.73	2.59	6.34	7.75	7.11	14.81	14.56	16	2.9	3.24	2.39	1.51665	1.56e-12	-2.41411	1.35e-28	-1.3125	2.3e-08	2.61118	7.47e-39
Capana05g002225	2.22	0.13	0.23	39.7	30.02	15.75	30.6	18.9	28.25	65.49	66.59	29.95	5.05117	5.73e-08	1.05836	0.00446874	0.925783	0.0381055	4.92246	3.31e-08
Capana06g000933	9.06	7.72	16.68	1.25	2.72	1.82	0	0	0	0.1	0.34	0	-2.50931	1.08e-07	3.69088	0.26959	-3.72948	8.12e-05	-9.92708	9.58e-15
Capana06g001024	21.89	25.59	18.4	8.05	6.65	9.1	2.98	0.9	2.08	1.39	0.91	3.9	-1.44807	1.1e-09	0.0578191	0.935549	-1.93479	0.000634379	-3.45219	1.03e-14
Capana06g002097	0	0	0	17.16	18.55	16.14	3.78	7.96	6.6	0	0	0	9.64568	1.97e-15	-8.2431	5.44e-10	-9.73582	1.39e-15	8.14449	1.11e-09
Capana12g000182	1.94	0	0.51	24.14	47.83	9.19	0.35	0.27	0	0	0.12	0.12	5.04325	4.36e-06	-1.36264	0.49012	-8.39485	3.09e-18	-1.96414	0.289203
Capana02g000302	0	0	0.22	5.27	5.16	1.21	1.95	24.61	6.74	0.4	0.21	0.21	5.72856	4.16e-06	-5.35305	5.84e-09	-3.82188	3.11e-06	7.24702	9.08e-08
Capana02g003352	2.59	1.04	2.73	0.48	0.67	1.03	5.35	0.36	4.52	16.62	14.78	10.73	-1.52377	0.0150121	2.04341	0.00519027	4.24816	3e-26	0.69959	0.446033
Capana08g001999	15.96	2.46	11.58	3.63	5.47	2.43	0.21	0.8	0.39	2.13	2.56	3.13	-1.37334	0.0568371	2.47459	0.000610513	-0.555059	0.255009	-4.40358	3.98e-07
Capana11g001813	4.01	0	6.24	62.09	13.06	11.87	163.45	146.69	127.66	88.96	66.81	139.36	3.10318	0.0774888	-0.571062	0.0650298	1.76461	0.00667716	5.4326	0.000557471
Capana04g001876	0.15	0.68	0.63	7.47	7.88	4.65	12.79	13.54	11.31	0	0.9	0	3.82305	8.17e-08	-5.412	4.98e-10	-4.48891	5.15e-05	4.73921	2.27e-14
Capana11g000350	2.24	2.15	2.36	4.85	7.27	6.81	13.56	11.51	11.19	4.23	2.79	6.56	1.5073	7.23e-08	-1.41755	7.95e-05	-0.474381	0.236132	2.43999	1.83e-25
Capana04g000852	29.88	28.55	31.3	0	0	0	0	0.16	0	33.74	32.96	23.39	-10.1441	4.35e-17	9.0637	1.51e-13	10.171	1.09e-16	-9.04329	8.12e-14
Capana12g001527	20.32	11.87	19.63	48.83	40.48	37.62	131.2	130.23	118.34	19.56	21.85	41.85	1.30599	1.73e-05	-2.19205	5.16e-11	-0.60339	0.0989363	2.88813	2.44e-27
Capana01g003545	25.6	58.67	41.19	1.53	11.55	4.36	5.28	4.21	6.75	3.77	2.19	7.06	-2.83053	3.56e-05	-0.321126	0.527614	-0.413389	0.590853	-2.93222	1.96e-13
Capana03g003558	40.77	43.92	36.63	21.66	19.34	17.26	4.56	6.99	3.76	21.74	24.04	19.98	-1.041	1.39e-09	2.10019	2.15e-12	0.179877	0.328348	-2.97032	4.75e-24
Capana02g000491	13.31	12.2	11.76	22.21	27.13	28.99	48.74	82.4	45.44	21.41	21.58	21.86	1.08904	5.78e-11	-1.44855	2.13e-07	-0.269321	0.0952442	2.26039	1.14e-14
Capana04g001844	11.73	13.02	13.58	0.27	0.42	0.25	0.22	0.19	0.25	10.13	10	10.95	-5.32987	1.41e-75	5.54479	4.09e-62	5.04951	6.28e-65	-5.83223	2.43e-70
Capana06g001874	10.47	12.84	10.16	0	0	0	0	0	0	5.71	5.8	5.2	-8.49671	1.18e-11	7.37235	3.24e-08	7.5182	1.21e-08	-8.35959	3.97e-11
Capana08g000284	42.56	20.79	34.85	4.47	9	7.33	5.38	12.08	5.39	69.95	91.4	102.82	-2.22491	2.21e-08	3.52721	7.92e-21	3.6667	8.44e-32	-2.08681	4.96e-06
Capana09g000202	14.8	10.87	13.79	1.49	4.43	4.82	3.83	0.34	1.71	35.29	29.76	129.35	-1.85607	7.22e-05	5.04914	5.01e-11	4.18173	1.61e-10	-2.73088	0.00016427
Capana10g001067	32.06	24.56	39.03	59.64	80.4	66.52	112.94	146.23	127.65	59.34	73.24	64.48	1.12556	8.07e-06	-0.975586	3.24e-07	-0.0645913	0.734848	2.03207	1.93e-16
Capana00g000052	9.69	1.69	0	0.72	0	0	7.3	0	6.48	90.04	87.88	2.38	-4.00418	0.0812978	3.71118	0.0549666	8.01392	0.000241248	0.29497	0.877296
Capana01g002097	98.43	92.06	122.74	0	0	0	0	0	0	176.5	181.91	248.47	-12.8411	1.39e-26	13.6704	8.93e-30	13.817	2.23e-30	-12.7017	5.62e-26
Capana04g001932	4.34	29.15	2.15	0.21	5.49	0.33	0	0.66	0.09	0.36	0.35	0.17	-2.54351	0.0467419	0.208292	0.882919	-2.77583	NA	-5.547	1.64e-05
Capana06g000364	81.84	76.5	95.6	7.15	11.81	10.25	0	0	0.05	4.29	4.08	31.46	-3.10017	5.08e-37	9.4514	8.15e-11	0.455157	0.554874	-12.1099	5.61e-24
Capana06g002443	4.51	2.15	6.88	9.61	9.48	11.41	4.08	2.53	5.41	1.58	2.17	3.66	1.18488	0.00825414	-0.698197	0.129989	-2.03716	2.16e-08	-0.156043	0.768172
Capana08g002245	24.32	1.21	8.84	85.05	72.69	40.64	321.91	227.5	307.34	482.58	543.1	241.82	2.53781	0.00300112	0.563781	0.0963236	2.67825	2.43e-11	4.65757	1.04e-08
Capana10g001975	22.09	17.28	16.67	36.73	41.15	33.25	122.3	85.88	95.34	163.58	158.59	113.26	1.00292	4.36e-06	0.519283	0.0358814	1.9739	9.52e-19	2.45305	3.17e-23
Capana11g000176	3.06	1.14	3.8	13	10.11	11.06	0.06	0	0.36	0	0	0	2.10681	8.34e-06	-3.80906	0.269077	-10.143	8.34e-17	-4.21136	7.96e-05
Capana01g004107	97.14	70.3	105.44	24.28	20.85	17.53	0.47	0.57	0.22	2.79	1.6	0.86	-2.10729	8.32e-17	2.06081	0.00493004	-3.57154	1.1e-16	-7.75123	6.18e-76
Capana01g000046	5.42	6.16	7.9	0.31	3.95	1.67	0.19	0.09	0	20.84	9.03	17.62	-1.69599	0.0305128	7.40543	8.05e-15	3.00002	5.78e-05	-6.10491	1.05e-10
Capana02g003485	75.2	55.26	178	39.42	54.97	42.32	1.81	3.27	0.61	0.39	0.5	1.14	-1.16086	0.0142567	-1.50112	0.0849734	-6.08088	1.61e-47	-5.74366	3.25e-18
Capana04g000966	31.64	12.4	31.02	6.93	17.54	2.4	0	0	0	0	0	0.24	-1.4757	0.0396921	2.68593	0.498928	-6.8179	5.04e-09	-10.9744	1.57e-17
Capana05g001741	94.33	217.38	82.82	37.2	55.59	92.28	9.53	5.38	9.18	6.03	9.3	6.52	-1.06826	0.0313858	-0.142047	0.692381	-3.08125	4.57e-15	-4.01825	6.02e-18
Capana08g000474	5.46	11.58	8.77	1.77	6.93	3.91	1.9	0.63	1.39	16.2	11	6.31	-1.01185	0.0719435	3.09959	4.63e-09	1.41136	0.0134793	-2.7063	3.61e-07
Capana09g000818	17.04	17.33	18.2	0	0	0	0	0	0	14.86	14.27	14.23	-9.5033	5.66e-15	9.10182	1.61e-13	9.24791	4.94e-14	-9.36468	1.94e-14
Capana11g000079	19.94	29.4	18.23	7.37	11.1	9.16	5.52	3.24	4.41	5.92	5.82	11.31	-1.27014	4.71e-06	0.806137	0.0307388	-0.255524	0.469367	-2.34224	2.84e-13
Capana11g001647	89.85	370.53	66.83	28.29	117.4	74.35	0	0	0	0	0.17	0.45	-1.23858	0.0925138	4.15352	0.174245	-8.47001	2.74e-27	-13.8691	4.29e-23
Capana01g001154	1.88	25.37	1.98	14.8	15.34	40.29	2.7	2.21	3.34	1.06	1.21	1.33	1.30364	NA	-1.19977	0.00114545	-4.28904	1.41e-19	-1.8097	NA
Capana08g002672	15.72	21.18	18.47	2.98	4.65	3.54	11.76	3.14	8.29	19.58	18.36	14.03	-2.28528	3.75e-19	1.16384	0.0117328	2.21707	6.93e-16	-1.23857	0.011477
Capana01g002361	59.25	65.1	108.75	42.29	52.5	30.67	3.93	24.72	4.9	39.9	74.22	37.57	-0.878008	0.0109667	2.17094	0.00114574	0.276638	0.441442	-2.78093	8.66e-05
Capana01g000019	1.11	0.29	1.95	2.46	0.84	0.74	12.18	10.27	10.39	26.27	26.63	23.52	0.28156	0.739997	1.21697	2.24e-11	4.26388	4.33e-20	3.30686	2.41e-08
Capana02g000177	5.33	9.54	6.07	8.75	10.88	11.92	6.28	6.71	6.09	1.88	2.13	2.35	0.614132	0.038564	-1.58764	1.71e-12	-2.30841	3.83e-23	-0.116878	0.696455
Capana01g004240	29.11	16.03	35.28	14.82	19.67	30.97	29.31	17.77	27.3	4.37	5.11	5.15	-0.2818	0.510376	-2.34743	2.93e-15	-2.16075	1.15e-09	-0.0961608	0.804088
Capana03g000296	17.04	19.09	27.24	20.48	21.77	25.9	1.32	0.84	0.81	0	0.38	1	0.124597	0.658767	-1.10837	0.385868	-5.63161	1.25e-19	-4.40209	2.75e-20
Capana03g004186	56.04	72.42	27.2	43.69	27.98	18.87	0.77	0.79	0	0.39	0.16	0.05	-0.758405	0.106145	-1.40459	0.342196	-7.23855	1.49e-31	-6.6223	5.34e-16
Capana07g000221	9.49	14.19	12.39	20.43	26.08	19.91	11.09	9.25	9.16	1.27	2.31	3.15	0.901048	0.000152061	-2.13597	2.38e-08	-3.3004	1.22e-19	-0.272672	0.283966
Capana10g002370	24.13	35	22.83	29.78	39.28	29.17	6.07	5.74	7.03	0.84	2.26	4.98	0.281383	0.26962	-1.22348	0.0409332	-3.59895	1.57e-10	-2.10455	1.23e-14
Capana02g001917	359.19	282.94	528.17	229.27	275.79	340.76	11.26	0.43	4.29	1.46	2.09	0.9	-0.452761	0.145224	-1.84427	0.0666472	-7.57123	4.89e-98	-6.1782	9.98e-14
Capana08g001874	58.28	35.13	40.82	30.16	26.91	42.21	4.09	3.58	3.42	9.98	10.2	12.72	-0.418195	0.171538	1.56758	7.98e-11	-1.59072	7.48e-10	-3.58123	2.78e-37
Capana08g001467	1.53	1.24	1.49	1.51	3.83	1.99	5.33	25.58	5.15	1.96	1.99	2.38	0.801337	0.184902	-2.51706	0.000388045	-0.214555	0.710161	3.09659	5.67e-05
Capana00g003083	11.59	4.43	7.42	3.16	10.07	3.11	5.34	2.67	2.23	66.04	36.72	14.94	-0.513538	0.408264	3.5216	3.75e-10	2.85497	9.16e-06	-1.17795	0.0281446
Capana01g004472	11.55	1.03	1.68	0.7	21.69	0.36	1.7	0.77	11.34	163.06	57.29	2.42	0.666064	NA	4.01263	0.0101734	3.30336	0.0751123	-0.0285855	0.980699
Capana03g003279	15.54	16.96	13.79	13.53	17.14	15.5	3.93	1.04	2.29	4.32	3.9	7.79	0.0168664	0.927914	1.1413	0.0422853	-1.52432	9.69e-06	-2.65799	4.31e-08
Capana01g000273	20.1	17.7	10.63	23.16	24.92	13.35	9.06	19.47	12.41	97.16	104.68	37.48	0.360104	0.337519	2.54414	1.81e-08	1.96529	9.36e-06	-0.22576	0.581446
Capana10g002350	15.99	1.92	7.95	7.56	3.47	3.76	0.43	0.49	1.57	43.79	38.62	99.2	-0.794522	0.299815	6.17966	8.87e-27	3.62833	1.63e-13	-3.35627	0.000151335
Capana02g000997	5.45	10.16	1.62	4.39	2.04	2.14	0.24	0.57	0	26.76	26.85	17.54	-0.983249	0.191121	6.46566	3.26e-22	3.07601	9.02e-14	-4.39952	6.57e-05
Capana12g000894	16.41	17.8	16.08	34.46	23.33	37.31	63.48	84.19	88.13	25.25	38.87	30.94	0.939738	0.000583887	-1.31344	6.4e-07	0.00121917	0.996762	2.24639	2.97e-23
Capana03g003830	5	5.33	3	5.5	11.35	3.08	8.55	13.24	9.1	56.41	49.21	20.18	0.594356	0.29189	2.0231	1.78e-06	2.66382	1.96e-06	1.22926	0.000874335
Capana06g000979	67.18	75.68	82.39	69.33	115.31	93.82	10.8	15.13	13.07	30.22	27.23	35.62	0.32254	0.180476	1.25193	1.92e-07	-1.57626	8.39e-10	-2.51319	7.35e-32
Capana06g001477	9.95	8.14	7.53	7.02	10.37	6.34	4.75	40.08	8.98	3.11	1.67	5.25	-0.0940742	0.761652	-2.42989	0.00161947	-1.23629	0.0137672	1.08691	0.148771
Capana11g000757	212.27	178.78	129.37	304.03	282.16	373.58	29.7	17.97	18.19	3.22	1.44	4.09	0.901809	0.000430701	-2.91213	4.64e-11	-6.77054	3.81e-79	-2.96558	3.8e-20
Capana09g000936	3.73	4.12	7.1	7.79	6.92	8.84	83.16	240.93	122.46	612.6	535.07	427.99	0.674043	0.0552868	1.81516	5.56e-06	6.06624	2.83e-166	4.91643	8.91e-25
Capana08g002436	31.58	40.44	65.61	19.4	35.63	36.71	1.92	0.91	2	3.68	2.5	12.98	-0.569153	0.146118	1.98772	0.0033109	-2.25179	0.000257917	-4.81686	1.76e-28
Capana11g001029	20.4	49.64	25.12	37.43	39.94	50.55	23.38	33.24	25.27	2.57	3.06	5.7	0.452496	0.256937	-2.85926	2.57e-12	-3.49665	2.54e-20	-0.199528	0.639041
Capana07g001083	29.99	34.34	32.63	19.79	28.26	21.89	0.05	0.38	0.09	15.16	15.64	14.32	-0.452913	0.020291	6.44524	1.22e-34	-0.629181	0.00243931	-7.53519	6.42e-50
Capana07g002280	21.1	8.13	5.07	2.14	19.99	0.92	12.98	2.02	14.34	70.7	51.46	11.16	-0.573276	0.581373	2.18464	0.00321743	2.5416	0.0483527	-0.2077	0.789709
Capana01g001420	2.37	1.94	2.95	2.1	3.95	3.51	7.81	4.24	6.96	45.26	44.33	23.24	0.414036	0.287154	2.56865	2.78e-12	3.55958	3.58e-21	1.40266	0.000218152
Capana01g004288	5.04	7.34	4.95	8.91	6.23	14.72	14.97	6.74	20.05	2.35	1.95	3.71	0.809606	0.0534779	-2.3819	8.28e-07	-1.89549	3.96e-05	1.28547	0.00636153
Capana11g000364	109.5	49.21	82	54.63	37.89	50.65	20.45	20.64	15.67	78.29	51.14	103.44	-0.733216	0.0392119	2.03431	2.56e-11	0.70612	0.0264546	-2.06719	1.89e-09
Capana03g000794	24.41	15.15	23.51	13.36	13.52	21.61	30	21.32	26.96	58.36	62.26	93.86	-0.362281	0.267656	1.4526	7.38e-08	2.14757	6.23e-12	0.328218	0.243252
Capana00g003170	5.32	3.02	6.23	11.44	5.45	4.62	9.89	14.49	9.38	50.34	36.58	28.61	0.573242	0.277691	1.77219	6.09e-08	2.43628	1.57e-08	1.22628	0.00248157
Capana02g002634	28.53	36.69	18.71	22.8	18.37	14.48	42.55	189.81	71.42	24.72	28.38	19.84	-0.5716	0.088396	-2.06277	5.47e-05	0.395111	0.136633	1.87174	0.00113235
Capana07g000030	15.52	10.8	13.38	19.05	28.19	27.05	8.39	3.21	6.5	0.43	0.56	1.18	0.919187	0.000432	-3.05891	5.7e-08	-5.09236	3.01e-35	-1.11687	0.00700868
Capana01g002584	92.12	59.21	87.97	116.21	136.54	120.55	302.55	397.19	332.3	142.95	164.22	199.47	0.656409	0.00544941	-1.029	1.55e-06	0.444841	0.0202427	2.12518	1.85e-17
Capana02g003126	26.98	32.17	26.93	17.57	19.98	22.41	4.58	6.22	5.22	19.36	21.89	21.19	-0.500856	0.00370214	1.95955	1.84e-20	0.0602004	0.727542	-2.40889	7.18e-30
Capana06g000346	50.38	44.22	59.47	70.19	100.55	66.53	421.94	358.3	393.67	208.75	200.92	158.75	0.637975	0.0100257	-1.04799	1.41e-08	1.26472	1.28e-07	2.94602	1.15e-56
Capana00g004676	288.51	229.9	301.02	217.27	151.18	278.58	61.82	63.47	60.32	205.73	261.86	241.59	-0.321791	0.269064	1.93169	1.39e-29	0.13423	0.626939	-2.12578	9.37e-34
Capana04g000806	18.38	19.54	38.75	30	30.15	36.16	13.87	21.41	9.92	8.06	8.44	4.83	0.346152	0.326286	-1.08642	0.003683	-2.17208	1.05e-15	-0.746243	0.0867304
Capana06g001221	20.05	26.38	14.05	16.13	13.22	14.25	39.22	26.37	28.75	59.17	60.82	69.19	-0.450389	0.11924	1.00245	6.54e-06	2.12286	5.59e-36	0.658359	0.041343
Capana06g001652	111.36	20.29	46.71	73.36	76.89	54.48	31.87	15.31	20.22	3.36	6	3.36	0.209362	0.721124	-2.40744	1.67e-09	-4.00697	9.68e-38	-1.38544	0.0250289
Capana06g001868	13.06	19.05	12.49	12.61	23.87	20	15.5	4.69	10.18	1.68	2.47	3.99	0.361534	0.278894	-1.90047	0.000495199	-2.79128	6.98e-11	-0.537222	0.270334
Capana07g002132	16.42	17.2	17.34	14.13	13.09	12.91	13.27	13.08	13.07	40.68	52.38	73.48	-0.327017	0.00444009	2.07668	1.3e-15	2.05735	4.55e-15	-0.353879	0.00192394
Capana09g002114	30.27	13.88	16.04	16.7	17.56	21.34	4.57	5.03	4.76	3.06	0.99	1.19	-0.100087	0.785473	-1.45342	0.00363193	-3.39908	9.87e-14	-2.0505	4.48e-08
Capana10g001816	24.16	38.31	27.55	9.54	17.93	20.39	2.53	0.65	1.74	3.68	2.5	5.66	-0.890977	0.0126061	1.26807	0.0258946	-2.00942	2.88e-06	-4.17808	1.04e-17
Capana11g000100	37.91	34.79	50.61	18.7	45.54	43.05	9.3	13.4	6.45	3.36	1.71	8.75	-0.186961	0.630636	-1.07941	0.0667896	-2.9477	1.2e-06	-2.06448	1.71e-09
Capana11g001133	20.92	22.31	41.47	21.21	19.05	25.23	13.21	17.48	9.91	4.74	3.78	3.06	-0.352602	0.343358	-1.81121	2.3e-05	-2.4956	2.86e-13	-1.04488	0.0137149
Capana02g002941	4.94	3.71	3.85	7.81	6.94	5.67	45.68	43.53	29.97	12.02	17.5	4.98	0.718297	0.0208026	-1.7913	8.4e-05	0.758755	0.124454	3.26724	5.35e-28
Capana01g002526	10.43	9.77	8.14	8.94	21.9	12	0.68	1.75	0.82	0.21	0.05	0	0.610728	0.114837	-3.64212	0.000897104	-7.34231	8.14e-21	-3.10697	4.99e-13
Capana02g002922	45.97	75.23	57.51	32.57	55.27	41.75	3.39	3.17	1.11	0.49	1.05	0.51	-0.444346	0.133229	-1.90649	0.00558718	-5.9844	1.4e-47	-4.52909	7.01e-24
Capana03g001926	34.23	4.09	19.86	13.58	16.22	13.69	43	79.28	37.99	205.59	156.73	348.8	-0.411302	0.547205	2.14581	1.2e-07	4.03677	2.08e-32	1.47904	0.0340564
Capana03g004213	47.21	22.25	28.64	35.4	25.36	19.39	88.01	70.77	90.6	236.8	205.03	190.02	-0.275434	0.476211	1.33977	6.97e-13	2.98273	2.97e-28	1.36319	4.1e-05
Capana08g002480	201.52	18.15	119.43	109.64	63.59	70.35	4.77	1.14	2.75	0.89	2.77	3.73	-0.464584	0.527694	-0.230403	0.759218	-5.0448	7.99e-25	-5.27431	1.32e-10
Capana04g000890	79.39	93.03	74.36	75.98	64.88	78.24	28.55	33.35	25.64	14.07	9.87	22.84	-0.151069	0.369657	-0.906343	0.00890367	-2.22258	6.04e-11	-1.47883	3.4e-14
Capana11g001506	20.54	29.11	16.69	12.1	13.3	13.1	1.97	1.3	2.65	1.59	0.79	1.03	-0.761808	0.0100132	-0.790727	0.273174	-3.4838	8.03e-16	-3.46799	8.15e-15
Capana01g002647	9.94	37.98	15.19	6.56	11.8	12.85	3.1	3.05	1.67	2.19	1.12	1.97	-0.990852	0.070772	-0.569033	0.215433	-2.55907	4.22e-10	-2.99636	1.35e-07
Capana02g002230	17.04	1.52	4.16	18.4	16.75	3.14	189.27	94.91	140.64	278.11	238.67	148.72	0.761502	0.408294	0.64667	0.0600245	4.12416	2.25e-12	4.2432	3.16e-08
Capana07g000898	11.35	28.15	15.07	27.95	23.37	26.77	70.69	243.97	100.05	180.52	155.18	56.99	0.542205	0.150431	-0.0830232	0.879348	2.33218	3.26e-08	2.94128	1.34e-07
Capana12g000264	90.94	47.55	76.64	69.17	139.6	66.03	392.76	361.27	366.1	183.62	180	248.93	0.363567	0.37119	-0.872743	8.9e-06	1.16304	0.000919689	2.39732	2.52e-17
Capana09g002123	22.86	1.66	1.61	11.76	5.74	3.24	59.67	57.55	97.82	142.96	70.86	27.4	-0.32315	0.760464	0.164817	0.759328	3.54618	5e-08	3.05842	NA
Capana10g000710	158.87	168.11	161.51	133.37	125.47	134.63	33.53	30.34	34.59	27.72	27.65	28.45	-0.293081	0.00435463	-0.234182	0.158368	-2.22735	1.88e-67	-2.29398	7.38e-65
Capana03g001041	570.13	1003.04	918.13	508.54	1106.7	903.89	138.46	254.16	158.68	102.16	113.73	92.41	0.0329126	0.9284	-0.841699	0.0031882	-3.02559	4.83e-22	-2.16019	6.71e-10
Capana03g001205	18.9	45.5	11.95	7.81	21.78	21.59	0.25	0.53	0.28	0.15	0.22	0.32	-0.554599	0.357197	-0.647808	0.511343	-6.23153	4.45e-23	-6.14974	4.67e-20
Capana04g001537	215.57	68.57	130.85	191.74	120.46	166.87	406.18	543.26	501.94	731.86	776.97	953.09	0.222631	0.622712	0.759964	0.000213123	2.36443	3.97e-22	1.82356	2.08e-05
Capana02g002687	117.61	106.4	86.76	60.44	78.35	82.56	18.54	15.83	13.23	14.73	17.2	34.15	-0.471979	0.0252335	0.471502	0.201932	-1.73886	2.08e-06	-2.69071	8.8e-33
Capana07g001257	12.07	11.9	13.56	24.85	23.51	18	3.3	1.96	2.87	3.29	3.1	3.53	0.839467	3.89e-05	0.287674	0.368741	-2.73632	7.56e-34	-2.1914	9.17e-16
Capana09g001814	9.54	8.69	17.75	3.9	6.83	9.18	1.62	1.72	1.47	1.29	1.17	0.74	-0.837623	0.0584429	-0.589416	0.117331	-2.63617	4.87e-10	-2.88777	9.02e-15
Capana00g003509	13.47	14.77	9.6	5.89	8.36	11.2	0.83	0.98	0.65	1.31	0.76	2.22	-0.551027	0.0938315	0.798096	0.159296	-2.56388	5.57e-08	-3.92575	1.66e-30
Capana06g000298	77.48	21.94	105.94	110.56	131.73	112.47	8.63	6.83	7.08	6.12	5.63	2.99	0.799977	0.136667	-0.613112	0.0965116	-4.5842	5.66e-54	-3.17039	8.85e-09
Capana03g003680	24.6	27.63	21.7	19.45	18.28	17.79	6.34	1.64	3.47	5.84	2.54	3.8	-0.39523	0.0590093	0.0907478	0.893023	-2.18019	1.89e-08	-2.67653	1.34e-07
Capana05g002555	28.57	92.82	7.81	21.63	45.01	25.42	0.18	0.41	0.17	0.05	1.01	0.31	-0.464045	0.550173	0.844033	0.495107	-6.07204	1.25e-17	-7.3897	4.34e-16
Capana08g001585	16.45	20.1	12.92	12.2	13.38	12.59	3	3.96	4.08	5.44	3.98	2.68	-0.352737	0.180952	0.130967	0.788776	-1.65149	6.69e-06	-2.14483	1.53e-09
Capana02g003578	17.05	21.87	19.2	19.54	24.31	29.09	1.82	1.68	2.57	3	1.43	2.07	0.348812	0.126724	0.0964354	0.839128	-3.48228	9.72e-24	-3.2395	3.19e-29
Capana00g003816	94.59	101.71	76.66	46.09	70.29	56.03	6.66	5.57	3.94	7.46	3.96	16.96	-0.645596	0.00421612	0.809439	0.120274	-2.59565	2.95e-07	-4.06186	6.24e-52
Capana03g003575	46.55	106.02	53.3	50.13	55.64	50.86	16.56	24.84	14.69	13.15	7.48	14.53	-0.370984	0.292235	-0.676741	0.0560952	-2.14981	1.77e-13	-1.86014	6.2e-06
Capana02g003457	20.37	8.14	5.87	8.19	32.09	3.88	52.73	14.89	41.89	74.94	96.94	29.82	0.365147	0.661811	0.881191	0.107192	2.19775	0.00310336	1.68816	0.00786031
Capana06g000492	20.38	26.62	27.66	17.87	27.5	32.44	12.93	6.16	9.02	4.26	3.67	8.7	0.0785588	0.785522	-0.757331	0.0877307	-2.22011	9.55e-08	-1.39301	4.11e-05
Capana08g002282	12.9	13.4	6.84	18.27	14.73	22.95	0.59	0.45	0	0.29	0.21	0.2	0.777463	0.0366525	-0.580842	0.706871	-6.3232	1.03e-22	-4.99219	3.09e-11
Capana03g001081	94.89	53.32	93.99	102.75	85.04	69.87	296.21	361.43	322.13	317.67	262.96	213.46	0.105031	0.739396	-0.305381	0.157734	1.62763	3.05e-11	2.03293	1.17e-12
Capana06g001620	17.86	47.05	13.87	2.4	26.84	10.12	0	0	0	0	0	0	-0.984878	0.230707	NA	NA	-10.1953	5.71e-12	-11.0055	1.7e-16
Capana10g002189	44.03	10.29	37.54	62.36	36.3	29.62	208.11	111.04	201.55	260.98	230.18	145.2	0.496468	0.389975	0.288658	0.392735	2.31332	3.23e-10	2.52039	4.66e-06
Capana12g002568	0	0	0	0	0	0	49.68	147.14	47.02	169.72	110.27	96.14	NA	NA	0.620734	0.205731	11.9842	1.69e-22	11.3017	2.31e-17
Capana12g002675	106.95	98.95	69.43	105.57	123.51	72.57	11.71	1.99	7.21	5.92	5.34	4.4	0.149121	0.609202	-0.416085	0.477797	-4.26279	2.72e-53	-3.7023	2.11e-10
Capana03g001019	27.44	27.6	36.91	33.11	32.39	59.43	11.42	3.67	8.83	6.63	7.11	15.97	0.460978	0.16007	0.312252	0.551188	-2.06814	3.42e-06	-1.92622	1.44e-05
Capana05g001195	5.64	7.43	6.88	10.89	9.46	15.71	21.11	34.86	27.85	18.88	16.12	8.63	0.87602	0.00232271	-0.944825	0.008425	0.276312	0.462207	2.08754	4.89e-14
Capana04g000095	8.2	7.75	8.41	13.53	12.33	11.58	34.34	48.17	37.3	19.19	19.61	21.5	0.635163	0.000550139	-0.993258	3.99e-06	0.694112	7.02e-05	2.31468	1.45e-25

## Sheet: Correlation analysis
Supplementary Table S8-Correlation analysis between all volatiles and differentially expressed genes (FPKM > 10 and | log2Fold Change | > 2) in terpenes metabolism, fatty acids metabolism, hormones metabolism, cell signaling and transcription factors.
Gene id	Acetone	2-Butanone	3-Methyl-2-butanone	Methyl.vinyl.ketone	2,3-Butanedione	3-Pentanone	2-Methyl-3-pentanone	Acetylacetone	2,3-Pentanedione	2-Methyl-4-hexanone	2-Heptanone	3,5-Octadien-2-one	Methanol	Isopropyl.Alcohol	Ethanol	2-Butanol	1-Methoxy-2-propanol	1-Penten-3-ol	3-Methyl-1-butanol	1-Pentanol	4-Methyl-1-pentanol	1-Hexanol	E-2-Hexadecacen-1-ol	Benzyl.alcohol	Phenylethyl.Alcohol	Acetaldehyde	Propanal	Isobutyraldehyde	2-Propenal	Butanal	Methacrolein	2-Methylbutyraldehyde	Isovaleraldehyde	2-Butenal	Hexanal	trans-2-Pentenal	3-Methyl-2-butenal	(Z)-2-heptenal	5-Ethylcyclopent-1-enecarboxaldehyde	Benzaldehyde	z-9-tetradecenal	Tetradecanal	13-Methyltetradecanal	Pentadecanal	Hexadecanal	cis-11-Hexadecenal	cis-9-Hexadecenal	Heptadecanal	9,17-Octadecadienal
Capana08g001080	-0.186913	0.363158	0.58982	0.744564	-0.101606	0.148864	0.651496	-0.248356	0.436186	0.961573	0.407163	0.88013	0.38199	0.717775	-0.337457	0.76971	0.0246367	0.577418	0.723161	0.623673	0.469564	0.0721793	0.461895	-0.448151	0.248377	0.759596	0.912909	0.385906	0.354941	0.912586	0.690556	0.357912	0.472743	0.651932	0.849005	0.325451	0.119427	0.61665	0.976048	0.951187	-0.161963	0.150195	-0.450186	0.0976503	0.887384	0.282765	-0.425815	0.811507	0.811376
Capana08g002013	0.521775	-0.677056	-0.579699	-0.0324023	0.31827	0.759669	-0.573165	-0.402286	0.65681	-0.377488	0.038182	-0.369232	0.598659	-0.298622	-0.237939	0.129527	-0.537988	0.279302	-0.414652	0.0814742	-0.518387	0.872853	-0.391992	0.557548	0.523545	-0.133237	-0.00815458	-0.334909	0.514279	-0.345325	0.162453	-0.491218	-0.433229	0.413648	-0.377132	0.377259	0.59474	0.48283	-0.414319	-0.289977	0.516373	0.444118	0.665633	0.0539515	-0.304308	-0.240181	0.554351	-0.275064	-0.274848
Capana10g000322	-0.375013	-0.0564185	0.269662	-0.474576	-0.736571	-0.689469	-0.32089	-0.423569	-0.515159	-0.0719886	0.682883	-0.0675825	-0.422901	-0.0387747	-0.111381	-0.463577	-0.290449	-0.588705	-0.230022	-0.475609	-0.334993	-0.255959	-0.407836	0.328521	-0.457004	-0.466126	-0.303375	-0.319224	-0.602469	-0.183747	-0.503663	-0.458429	-0.337987	-0.410195	-0.110122	-0.572878	-0.753947	-0.395435	-0.0829172	-0.227191	0.150978	-0.414688	0.175495	0.144518	-0.0563352	0.0431519	0.432532	-0.0117627	-0.00809158
Capana10g002384	0.451558	-0.617721	-0.498846	0.160316	0.430247	0.838523	-0.419019	-0.396157	0.817026	-0.16212	0.0596249	-0.166348	0.742369	-0.140512	-0.365319	0.363169	-0.476055	0.477968	-0.221137	0.221126	-0.447729	0.925692	-0.301442	0.442719	0.627425	0.0497817	0.218193	-0.207353	0.656244	-0.137498	0.372408	-0.346024	-0.303231	0.597904	-0.185493	0.458433	0.703955	0.663713	-0.201187	-0.0735609	0.490298	0.535972	0.568981	0.0957492	-0.129056	-0.265787	0.423249	-0.101103	-0.10096
Capana06g001666	0.269661	-0.0339945	-0.47723	-0.0803161	0.767745	0.303227	-0.0365428	0.619933	0.0212387	-0.467486	-0.769361	-0.526185	-0.0361928	-0.417391	0.248525	-0.123814	0.345702	0.0385212	-0.114703	-0.0768307	0.0416762	0.0116982	-0.0240879	-0.0857106	0.0146724	-0.0355926	-0.339295	-0.0720075	0.250832	-0.46085	-0.10932	0.215628	0.162024	-0.145659	-0.438848	0.192203	0.485277	-0.125684	-0.523832	-0.414544	-0.169641	0.0113092	-0.0128834	-0.320297	-0.466576	-0.43825	-0.222942	-0.405791	-0.41315
Capana06g000897	0.466038	-0.640667	-0.560007	0.0916526	0.444198	0.793175	-0.471334	-0.364388	0.72648	-0.264037	0.013759	-0.314226	0.628691	-0.259342	-0.289541	0.260667	-0.499644	0.402755	-0.303191	0.1417	-0.456729	0.889964	-0.370447	0.469942	0.510248	-0.00995825	0.102753	-0.315042	0.642638	-0.262249	0.265471	-0.407848	-0.316933	0.488996	-0.294054	0.449574	0.65598	0.56074	-0.332259	-0.212275	0.46901	0.427442	0.581716	-0.0100876	-0.200667	-0.342233	0.430312	-0.166545	-0.168613
Capana07g001760	-0.460445	-0.0703231	0.236299	-0.394066	-0.762626	-0.651061	-0.264133	-0.462953	-0.420426	0.0411927	0.752108	0.110503	-0.34175	0.100226	-0.238018	-0.324569	-0.269584	-0.507756	-0.162195	-0.378206	-0.320332	-0.219583	-0.305441	0.3074	-0.37421	-0.362285	-0.171137	-0.167716	-0.59112	-0.0214915	-0.3707	-0.390123	-0.332966	-0.296577	0.020753	-0.586213	-0.726679	-0.294133	0.0696355	-0.0732048	0.117186	-0.27373	0.12165	0.236651	0.019323	0.113657	0.390571	0.0525569	0.0585482
Capana09g000953	0.586702	-0.561784	-0.436534	0.0757532	0.409118	0.837956	-0.431394	-0.307903	0.747026	-0.255648	0.00795382	-0.240726	0.748136	-0.199589	-0.284857	0.219568	-0.40485	0.379234	-0.225967	0.163781	-0.434645	0.872828	-0.310707	0.488459	0.699701	-0.0496816	0.111941	-0.228372	0.555786	-0.246814	0.272347	-0.348754	-0.325297	0.52839	-0.259296	0.44215	0.750284	0.602281	-0.282785	-0.127305	0.523809	0.511952	0.629512	0.107977	-0.259251	-0.17434	0.514145	-0.180119	-0.179634
Capana08g000039	0.382834	-0.692684	-0.558341	0.0976471	0.352756	0.792366	-0.463342	-0.409071	0.782064	-0.20752	0.073812	-0.161802	0.716509	-0.125372	-0.381934	0.323489	-0.488873	0.444815	-0.279954	0.20128	-0.485245	0.91783	-0.283934	0.447538	0.598677	-0.00740302	0.171624	-0.168451	0.605916	-0.136989	0.336459	-0.338369	-0.345411	0.565209	-0.216208	0.394441	0.635931	0.611145	-0.220452	-0.108969	0.470368	0.564472	0.557004	0.139554	-0.153901	-0.259104	0.436593	-0.164927	-0.164661
Capana12g001573	-0.0900913	-0.172804	-0.159949	-0.803541	-0.419204	-0.629785	-0.495327	0.10431	-0.791436	-0.705653	0.0356739	-0.702858	-0.670741	-0.549967	0.316882	-0.942257	-0.06356	-0.828654	-0.567132	-0.729399	-0.3189	-0.38826	-0.463405	0.363485	-0.573526	-0.777065	-0.892428	-0.463827	-0.664346	-0.766384	-0.887692	-0.407492	-0.374466	-0.826255	-0.661878	-0.551003	-0.595227	-0.816353	-0.737453	-0.818038	0.0249682	-0.542239	0.233565	-0.136195	-0.641979	-0.137423	0.414508	-0.560866	-0.564357
Capana01g004020	0.546346	-0.612424	-0.497776	0.0789338	0.415166	0.830365	-0.458143	-0.329317	0.755681	-0.259415	0.00905555	-0.240213	0.730162	-0.215664	-0.300783	0.24198	-0.425085	0.391402	-0.268986	0.146626	-0.466574	0.887822	-0.324537	0.488417	0.674061	-0.0476622	0.115454	-0.217642	0.566893	-0.235032	0.296516	-0.367504	-0.361718	0.519694	-0.25078	0.428712	0.725324	0.59516	-0.290048	-0.143219	0.511904	0.532893	0.623628	0.123426	-0.259036	-0.203633	0.495168	-0.182446	-0.180765
Capana00g004724	0.328205	-0.585756	-0.460506	0.33238	0.413508	0.825106	-0.291881	-0.459011	0.885628	0.0469547	0.131524	0.022258	0.743692	-0.0173139	-0.438799	0.558813	-0.477454	0.610283	-0.124021	0.321654	-0.363156	0.916133	-0.205122	0.315959	0.593389	0.226913	0.412862	-0.0995157	0.733809	0.0848117	0.549718	-0.281413	-0.237897	0.690362	0.0214297	0.500812	0.659002	0.749882	0.00179581	0.104365	0.400298	0.5716	0.425918	0.111188	0.072008	-0.247119	0.261879	0.0789762	0.0810607
Capana05g000220	0.111851	-0.429705	-0.465262	0.308743	0.454572	0.735046	-0.24748	-0.443341	0.835143	0.0678156	0.0772677	0.100046	0.633728	0.138124	-0.456637	0.649762	-0.432264	0.581022	-0.0631141	0.421945	-0.329141	0.802992	-0.0948156	0.22999	0.421988	0.3032	0.428531	-0.0294	0.698789	0.15223	0.510549	-0.161896	-0.105133	0.695576	-0.00563434	0.390324	0.550733	0.716741	0.0707706	0.147163	0.32197	0.5707	0.326379	0.0804901	0.180856	-0.325175	0.130083	0.0372818	0.0379146
Capana06g001834	0.651354	-0.557173	-0.261661	0.0791538	0.242979	0.783241	-0.336415	-0.252887	0.683889	-0.192436	0.0724218	-0.180318	0.796422	-0.162543	-0.251108	0.112513	-0.345621	0.362358	-0.141279	0.150262	-0.334755	0.819933	-0.253896	0.433258	0.789465	-0.0947402	0.113976	-0.185413	0.485568	-0.201127	0.245428	-0.282227	-0.287514	0.511654	-0.185956	0.459489	0.736311	0.56982	-0.212745	-0.0608412	0.499913	0.45406	0.568928	0.146794	-0.245175	-0.0248045	0.543458	-0.124089	-0.125916
Capana03g001671	0.464791	-0.52989	-0.329998	0.304818	0.406692	0.867134	-0.306281	-0.492753	0.893262	0.0290784	0.211513	-0.0589133	0.802701	-0.0491842	-0.43841	0.484104	-0.52728	0.568639	-0.0655449	0.313602	-0.363151	0.96075	-0.298145	0.407076	0.643093	0.188309	0.387816	-0.253745	0.750265	-0.0196905	0.463693	-0.358918	-0.202323	0.720186	-0.0486484	0.55661	0.731803	0.797799	-0.0440343	0.0796857	0.497868	0.471816	0.527001	0.0356003	0.048786	-0.254492	0.397193	0.0964298	0.0947666
Capana00g003654	-0.33578	-0.233745	0.013852	-0.616449	-0.648138	-0.653564	-0.470985	-0.344581	-0.54056	-0.292991	0.620865	-0.243381	-0.479362	-0.200418	-0.157354	-0.569493	-0.223455	-0.709635	-0.40788	-0.600715	-0.468969	-0.234649	-0.485096	0.346768	-0.499076	-0.580973	-0.476543	-0.344845	-0.646279	-0.369664	-0.585687	-0.533536	-0.466476	-0.504881	-0.281919	-0.625569	-0.692816	-0.477379	-0.297719	-0.418204	0.0113027	-0.362954	0.171343	0.162158	-0.299294	-0.11747	0.436191	-0.208353	-0.199556
Capana10g001620	-0.0736458	0.0759741	-0.0047001	-0.649408	-0.277139	-0.64891	-0.133098	0.475593	-0.870298	-0.579375	-0.184268	-0.594005	-0.72547	-0.469691	0.374468	-0.889992	0.338412	-0.740207	-0.269828	-0.633911	0.0055646	-0.639649	-0.193955	0.0147987	-0.571505	-0.635636	-0.828505	-0.235992	-0.655613	-0.638632	-0.814078	-0.0345333	-0.067752	-0.853089	-0.519678	-0.45521	-0.471049	-0.867179	-0.601572	-0.659909	-0.286217	-0.582942	-0.101359	-0.250779	-0.598151	-0.0997639	0.0794828	-0.480008	-0.484154
Capana01g000005	0.0540633	-0.509681	-0.363765	-0.646203	-0.301023	-0.128823	-0.786359	-0.446154	-0.143746	-0.594352	0.454938	-0.521637	-0.084863	-0.423618	-0.230835	-0.512099	-0.469825	-0.500961	-0.595202	-0.549101	-0.753535	0.27371	-0.710097	0.82669	-0.0657433	-0.69568	-0.535281	-0.512416	-0.345738	-0.652919	-0.510735	-0.742415	-0.691218	-0.280998	-0.568389	-0.390805	-0.213676	-0.197952	-0.613833	-0.623251	0.506021	-0.0381679	0.730624	0.128672	-0.600475	-0.174353	0.863495	-0.445703	-0.4405
Capana01g001418	-0.122894	0.0126124	0.216124	0.754749	0.0667573	0.443816	0.406651	-0.415651	0.743717	0.827749	0.396292	0.805694	0.619184	0.631691	-0.521079	0.922892	-0.17458	0.76418	0.527541	0.656645	0.200803	0.442912	0.33229	-0.225257	0.452374	0.721266	0.949852	0.373734	0.576455	0.856444	0.846772	0.214122	0.252606	0.831789	0.749727	0.419374	0.329282	0.817026	0.846701	0.855301	0.038241	0.451379	-0.199029	0.185415	0.770654	0.151347	-0.256025	0.689725	0.692206
Capana04g001422	0.169247	0.121589	-0.217824	-0.377558	-0.216202	-0.279344	-0.0222018	0.423337	-0.643621	-0.525602	-0.41284	-0.518653	-0.64491	-0.394529	0.586298	-0.646577	0.200346	-0.505984	-0.320757	-0.233892	0.287823	-0.494641	0.150804	-0.0551394	-0.452998	-0.27618	-0.632679	-0.117927	-0.399985	-0.451459	-0.570043	-0.00455171	0.000818708	-0.643765	-0.431734	-0.111939	-0.281116	-0.688578	-0.500536	-0.50215	-0.349027	-0.371703	-0.166696	-0.407766	-0.425341	0.188083	-0.0845754	-0.460292	-0.46633
Capana06g000197	0.313852	-0.467739	-0.466654	-0.715929	-0.071469	-0.0369524	-0.729234	-0.0247747	-0.275432	-0.851763	-0.0341499	-0.813443	-0.160367	-0.643089	0.151424	-0.751958	-0.253609	-0.578264	-0.680067	-0.567543	-0.551741	0.157491	-0.588722	0.641028	-0.0713286	-0.722298	-0.785099	-0.543787	-0.302739	-0.892956	-0.661153	-0.576707	-0.5491	-0.447877	-0.797397	-0.252849	-0.0350114	-0.389363	-0.882819	-0.839107	0.31041	-0.155282	0.597227	-0.0432003	-0.816047	-0.217467	0.681669	-0.676391	-0.678313
Capana10g000625	0.614213	-0.503611	-0.409472	0.0790457	0.421834	0.839975	-0.425389	-0.309272	0.739316	-0.249963	0.00649336	-0.239212	0.735186	-0.198508	-0.264315	0.221196	-0.396092	0.351471	-0.217154	0.168585	-0.423247	0.850833	-0.309118	0.493916	0.697168	-0.0298915	0.116048	-0.241007	0.534995	-0.254228	0.267213	-0.367034	-0.323237	0.52513	-0.254747	0.440122	0.756474	0.60763	-0.277049	-0.113137	0.523618	0.502074	0.63683	0.105881	-0.26009	-0.152061	0.515491	-0.170018	-0.16836
Capana03g004592	0.556512	-0.462367	-0.310756	0.207714	0.391224	0.86522	-0.361641	-0.454067	0.842145	-0.0669367	0.167374	-0.0996113	0.801024	-0.0755117	-0.37191	0.381961	-0.485918	0.449383	-0.109711	0.272335	-0.395582	0.915799	-0.301526	0.479555	0.703242	0.11059	0.29687	-0.252861	0.625442	-0.107714	0.381814	-0.391068	-0.265976	0.665933	-0.118439	0.493355	0.750375	0.752614	-0.109135	0.0415017	0.547221	0.500241	0.610526	0.101073	-0.070674	-0.154843	0.492238	0.00189284	0.00297365
Capana12g000575	-0.320991	0.0202387	0.448232	-0.220083	-0.704797	-0.592079	-0.124975	-0.456282	-0.354755	0.197994	0.740792	0.179946	-0.296653	0.112775	-0.174687	-0.216457	-0.195018	-0.415116	-0.0624947	-0.317433	-0.202754	-0.249662	-0.256175	0.0446738	-0.357861	-0.241225	-0.0252781	-0.168874	-0.479459	0.0851676	-0.231492	-0.360508	-0.244977	-0.226724	0.170599	-0.416443	-0.656864	-0.205866	0.184696	0.0523526	-0.0319592	-0.324661	-0.0429764	0.252614	0.172934	0.0950968	0.199909	0.227048	0.239005
Capana12g002508	-0.256724	-0.0414627	0.312406	-0.47109	-0.666264	-0.594956	-0.390394	-0.456364	-0.440247	-0.128721	0.53035	-0.113066	-0.307609	-0.0818874	0.0199436	-0.456825	-0.37869	-0.484464	-0.278334	-0.465621	-0.398304	-0.162235	-0.454094	0.436333	-0.312454	-0.556542	-0.31364	-0.34172	-0.537311	-0.220465	-0.476923	-0.467274	-0.396852	-0.385143	-0.156988	-0.514545	-0.699576	-0.362363	-0.140647	-0.272723	0.437329	-0.332628	0.395839	0.198156	-0.0673427	0.131211	0.564757	-0.0578517	-0.0553534
Capana11g000928	-0.286965	-0.111245	0.222868	0.417128	-0.352438	0.185124	0.105983	-0.674089	0.55962	0.663714	0.645777	0.821825	0.517017	0.683101	-0.550211	0.688735	-0.354826	0.451055	0.26344	0.479103	-0.0835068	0.392167	0.219754	-0.00977291	0.366869	0.403495	0.752482	0.355259	0.205914	0.77673	0.610383	-0.00348271	-0.0602048	0.673448	0.623738	0.0607718	-0.0315022	0.635236	0.774457	0.72902	0.194168	0.490372	-0.01161	0.47923	0.664543	0.303642	0.0464987	0.498004	0.50735
Capana00g002444	-0.127723	0.259206	0.389182	0.748067	0.0726413	0.369289	0.482445	-0.397899	0.651465	0.8675	0.392332	0.812924	0.509327	0.705714	-0.434541	0.914435	-0.128816	0.653779	0.615704	0.717454	0.305012	0.298413	0.385847	-0.326745	0.309596	0.800717	0.950776	0.307311	0.519132	0.847693	0.757099	0.232616	0.393514	0.808824	0.729135	0.39698	0.267972	0.787952	0.891266	0.899115	-0.0546483	0.310905	-0.29155	0.106611	0.865147	0.137128	-0.346358	0.721305	0.723256
Capana00g003506	-0.118378	-0.0567074	0.0970159	0.691321	0.0807293	0.49013	0.321856	-0.408055	0.778302	0.733553	0.320841	0.815928	0.654695	0.642775	-0.520646	0.924929	-0.149989	0.738494	0.424796	0.664054	0.12027	0.468323	0.37871	-0.226964	0.509958	0.672514	0.906736	0.468143	0.531175	0.846383	0.861743	0.224315	0.158907	0.835656	0.701932	0.367414	0.35034	0.809379	0.80472	0.827273	0.023226	0.601039	-0.175944	0.315511	0.689884	0.178727	-0.248823	0.566383	0.573872
Capana07g000375	-0.0974929	0.38906	0.583845	0.680385	0.0498328	0.19528	0.478152	-0.414335	0.462767	0.853354	0.499909	0.632989	0.308073	0.559538	-0.360067	0.759222	-0.148321	0.482739	0.634164	0.548967	0.314391	0.162844	0.186025	-0.331696	0.0687878	0.726682	0.843073	0.0294125	0.457513	0.675056	0.565531	0.0828089	0.443388	0.643795	0.64806	0.372564	0.139974	0.662617	0.785164	0.769243	-0.0885806	-0.0246478	-0.300123	-0.0715636	0.861532	-0.0168177	-0.328389	0.79258	0.792859
Capana03g003690	-0.183448	-0.00325894	0.208902	-0.574337	-0.498124	-0.5869	-0.422293	-0.228484	-0.536229	-0.336158	0.220048	-0.304168	-0.371215	-0.239166	0.197218	-0.597712	-0.262369	-0.514308	-0.343998	-0.556963	-0.396084	-0.233455	-0.466661	0.4835	-0.30375	-0.694126	-0.509615	-0.340866	-0.567245	-0.402576	-0.592125	-0.375017	-0.387793	-0.537738	-0.330587	-0.531678	-0.638647	-0.514978	-0.349416	-0.46029	0.514326	-0.339658	0.486451	0.12234	-0.268946	0.111427	0.583895	-0.247676	-0.248513
Capana03g001691	0.108299	-0.261819	-0.00717418	0.604954	0.101969	0.668163	0.174195	-0.3986	0.890174	0.566495	0.284533	0.704287	0.859081	0.527918	-0.539174	0.817244	-0.182178	0.750611	0.310966	0.608348	-0.014725	0.651988	0.295134	-0.0754069	0.772252	0.511876	0.814658	0.448097	0.553644	0.704592	0.850273	0.150253	-0.00261596	0.878835	0.583686	0.427826	0.542943	0.867215	0.65241	0.725252	0.167862	0.747908	0.0185236	0.425526	0.475733	0.229709	-0.0336567	0.4223	0.431096
Capana12g002555	-0.0712568	-0.170523	0.0706899	-0.695545	-0.634805	-0.547629	-0.548857	-0.261654	-0.57267	-0.491518	0.269953	-0.419582	-0.386174	-0.323823	0.230185	-0.756487	-0.333735	-0.648991	-0.515684	-0.592154	-0.433922	-0.180321	-0.475407	0.546714	-0.295375	-0.772421	-0.639005	-0.40105	-0.633036	-0.52262	-0.697866	-0.502563	-0.510518	-0.585332	-0.455837	-0.533055	-0.638571	-0.572818	-0.481059	-0.575773	0.439438	-0.335003	0.5016	0.131009	-0.406365	0.160194	0.67648	-0.386328	-0.386744
Capana01g000113	0.492157	-0.182961	0.0226129	0.623002	0.469393	0.867194	0.0448386	-0.430718	0.9472	0.417623	0.235388	0.220702	0.850405	0.13477	-0.395144	0.709455	-0.3917	0.724449	0.274657	0.48543	-0.0648366	0.834577	-0.125912	0.184393	0.70486	0.515606	0.699803	-0.147537	0.830494	0.27439	0.692475	-0.192851	0.0483829	0.857177	0.306868	0.701239	0.795569	0.953056	0.307404	0.43972	0.407607	0.392911	0.320259	-0.00453024	0.352492	-0.0975572	0.162283	0.466285	0.464788
Capana11g001334	-0.0519512	0.354678	0.0163485	-0.202909	0.343959	-0.319118	0.35468	0.90642	-0.559319	-0.312612	-0.604621	-0.371167	-0.488719	-0.294336	0.243385	-0.41154	0.793327	-0.21567	0.246169	-0.2996	0.338615	-0.64649	0.132375	-0.344722	-0.333488	-0.252323	-0.485703	0.12216	-0.245418	-0.357292	-0.398404	0.543522	0.4104	-0.556585	-0.272475	-0.122624	0.0349666	-0.577327	-0.347024	-0.333273	-0.457009	-0.353659	-0.367992	-0.434498	-0.437215	-0.240881	-0.373307	-0.292614	-0.300105
Capana02g002775	0.159197	-0.221539	-0.310823	0.396562	0.414981	0.779949	-0.141737	-0.468039	0.903466	0.214221	0.114256	0.33969	0.728941	0.330831	-0.475269	0.775011	-0.342768	0.583721	0.0636199	0.557196	-0.254945	0.744754	0.070223	0.182699	0.577724	0.431231	0.583675	0.148054	0.603328	0.330741	0.636182	-0.0934119	-0.0900915	0.810467	0.169714	0.370021	0.601048	0.834815	0.284314	0.393329	0.31709	0.722785	0.297952	0.250406	0.268013	-0.080959	0.106986	0.127601	0.135776
Capana08g000628	0.223876	-0.0799605	0.170233	0.789162	0.275317	0.710435	0.294289	-0.440595	0.916691	0.720159	0.348416	0.590283	0.800357	0.421477	-0.48822	0.898205	-0.27165	0.825716	0.464287	0.626045	0.117871	0.67038	0.142408	-0.0799255	0.642384	0.697442	0.927341	0.152234	0.765579	0.654068	0.871551	0.0330548	0.176927	0.919348	0.629514	0.637035	0.617947	0.965621	0.665686	0.743484	0.19362	0.453551	0.0133603	0.107223	0.633016	0.0611727	-0.0950076	0.672244	0.674159
Capana08g000691	-0.272643	-0.206733	0.0135436	-0.786329	-0.649817	-0.634874	-0.608405	-0.326757	-0.579375	-0.491754	0.454384	-0.360962	-0.434727	-0.218598	-0.00593495	-0.709473	-0.290454	-0.769217	-0.505391	-0.608225	-0.555452	-0.207413	-0.50752	0.497333	-0.429737	-0.764639	-0.639688	-0.388029	-0.708816	-0.518731	-0.744583	-0.524509	-0.50801	-0.553378	-0.491506	-0.691559	-0.702438	-0.550813	-0.448553	-0.5597	0.259129	-0.321006	0.392275	0.203817	-0.406118	-0.0453925	0.624999	-0.422197	-0.418072
Capana03g000103	-0.307502	-0.200335	0.00467561	-0.643707	-0.606712	-0.646431	-0.516685	-0.362593	-0.551969	-0.34135	0.586477	-0.312774	-0.502023	-0.250366	-0.113211	-0.591858	-0.269661	-0.725643	-0.438647	-0.625132	-0.500888	-0.223723	-0.543966	0.425437	-0.518073	-0.612584	-0.516113	-0.415696	-0.641187	-0.43728	-0.62777	-0.583888	-0.484599	-0.532289	-0.34146	-0.62704	-0.695444	-0.492391	-0.360182	-0.477143	0.104118	-0.390379	0.263218	0.118025	-0.327869	-0.131279	0.49655	-0.236256	-0.228633
Capana01g001577	0.104377	0.333054	0.581313	0.773223	0.203362	0.271559	0.549197	-0.272653	0.433957	0.825273	0.387283	0.356437	0.289795	0.281252	-0.204909	0.633237	-0.207547	0.586921	0.670101	0.459224	0.452761	0.237395	0.0251132	-0.255257	0.0581875	0.741715	0.77582	-0.236182	0.678299	0.493606	0.511798	0.0343526	0.556962	0.572058	0.57485	0.616301	0.281484	0.627387	0.611814	0.607584	-0.00495329	-0.299898	-0.243543	-0.42521	0.804996	-0.134616	-0.301451	0.879892	0.865706
Capana08g000853	-0.0521471	-0.0860391	0.0434156	-0.536773	-0.513921	-0.492906	-0.351531	-0.148836	-0.550946	-0.375863	0.285745	-0.333573	-0.534702	-0.244953	0.15776	-0.577392	-0.0626772	-0.720962	-0.441161	-0.436323	-0.223054	-0.346853	-0.239028	-0.00966585	-0.537503	-0.447422	-0.509016	-0.306622	-0.561626	-0.396782	-0.570634	-0.421592	-0.321961	-0.519047	-0.343781	-0.404723	-0.554913	-0.516036	-0.357543	-0.42618	-0.30103	-0.377556	-0.0732295	0.0750241	-0.277498	-0.0760845	0.134153	-0.298536	-0.285539
Capana07g000704	-0.470601	0.139309	0.570198	-0.151041	-0.688029	-0.602281	-0.00420644	-0.43045	-0.287714	0.33209	0.702893	0.389406	-0.187522	0.344076	-0.239601	-0.0716873	-0.13026	-0.282626	0.117255	-0.170726	-0.148778	-0.268457	-0.111703	-0.0250652	-0.275821	-0.174643	0.105816	0.00704522	-0.454643	0.269081	-0.143705	-0.140508	-0.101349	-0.101789	0.272859	-0.45451	-0.653987	-0.122398	0.374127	0.227044	0.0374247	-0.217885	-0.0796211	0.337449	0.328479	0.152142	0.143497	0.27754	0.286429
Capana10g000325	-0.317013	-0.163061	0.18396	-0.464099	-0.699051	-0.586154	-0.411698	-0.511779	-0.396635	-0.0897903	0.737813	-0.0679992	-0.312407	-0.0716884	-0.199346	-0.412237	-0.362497	-0.541209	-0.285673	-0.489531	-0.45043	-0.119492	-0.485325	0.444697	-0.33713	-0.484537	-0.26851	-0.330111	-0.556966	-0.197291	-0.431687	-0.551189	-0.455542	-0.33801	-0.105761	-0.549024	-0.668191	-0.298573	-0.104327	-0.228792	0.254729	-0.300812	0.299838	0.218589	-0.109734	0.0419201	0.540617	-0.0150646	-0.00823378
Capana11g000719	0.0230241	-0.0673231	0.0596579	0.617187	0.108143	0.628686	0.231177	-0.417207	0.85863	0.614192	0.261993	0.776457	0.785617	0.662461	-0.500482	0.888044	-0.176205	0.710647	0.378104	0.728592	0.0626902	0.561585	0.401148	-0.133623	0.663753	0.619628	0.857076	0.468055	0.523761	0.766001	0.823034	0.204814	0.11368	0.907459	0.585125	0.386102	0.476994	0.873381	0.735424	0.801218	0.123167	0.722079	-0.045865	0.383957	0.595258	0.247594	-0.118066	0.429729	0.437469
Capana00g003085	0.241909	-0.428673	-0.36903	0.468206	0.472195	0.791995	-0.155387	-0.463186	0.895811	0.211948	0.144031	0.128832	0.689405	0.0703092	-0.444687	0.702175	-0.449306	0.677282	0.0048848	0.405908	-0.250381	0.847446	-0.14151	0.210903	0.50426	0.399119	0.548581	-0.076796	0.792216	0.214673	0.638177	-0.220101	-0.10689	0.737337	0.151337	0.535918	0.628826	0.800062	0.145062	0.233545	0.329922	0.512789	0.310352	0.0380214	0.242184	-0.270343	0.109507	0.232755	0.234275
Capana12g001743	0.228213	-0.364334	-0.404261	0.311545	0.527625	0.739525	-0.27552	-0.469715	0.794134	0.0387897	0.0933064	-0.07034	0.563277	-0.00648843	-0.371723	0.583203	-0.514109	0.530211	-0.0764983	0.354724	-0.318316	0.811161	-0.248135	0.300232	0.330629	0.306251	0.380064	-0.265773	0.757156	0.00665208	0.425721	-0.306189	-0.0812998	0.642044	-0.0838974	0.46766	0.567382	0.7027	-0.0376048	0.0461621	0.378797	0.376976	0.400735	-0.0933875	0.166794	-0.422249	0.180796	0.0851549	0.0823373
Capana09g000177	0.232403	-0.567158	-0.394587	0.348572	0.392196	0.754196	-0.257989	-0.487407	0.855276	0.106501	0.187498	0.0294669	0.703178	0.017044	-0.459171	0.57324	-0.514921	0.625438	-0.0721784	0.328006	-0.339082	0.898121	-0.231216	0.279627	0.493539	0.251684	0.437311	-0.15694	0.771423	0.10828	0.522953	-0.266049	-0.156428	0.692992	0.0306695	0.493523	0.587698	0.741453	0.0374609	0.110316	0.387891	0.466581	0.37718	0.0438861	0.168317	-0.334665	0.222486	0.139011	0.136799
Capana04g002519	-0.207802	-0.00415472	-0.071019	-0.604329	-0.552817	-0.674874	-0.244049	0.0787394	-0.795389	-0.441742	0.165469	-0.445904	-0.731271	-0.35698	0.236061	-0.769892	-0.0136703	-0.726235	-0.353549	-0.563974	-0.0838064	-0.495738	-0.249808	0.288348	-0.604015	-0.544076	-0.67878	-0.293288	-0.677997	-0.488508	-0.741531	-0.287807	-0.237355	-0.75188	-0.395645	-0.512133	-0.659663	-0.757317	-0.453667	-0.550958	-0.0857468	-0.529111	0.0610771	-0.22442	-0.430741	0.0750727	0.280941	-0.343127	-0.347488
Capana03g002170	-0.271998	-0.130734	-0.0423992	-0.64784	-0.660444	-0.69159	-0.398395	-0.164308	-0.700746	-0.389809	0.412594	-0.356843	-0.630356	-0.286707	0.0791346	-0.71594	-0.166713	-0.773542	-0.435981	-0.597571	-0.287934	-0.369123	-0.374955	0.3581	-0.567731	-0.574256	-0.607432	-0.342485	-0.707012	-0.446399	-0.699671	-0.46018	-0.39349	-0.65529	-0.356158	-0.601606	-0.724704	-0.646665	-0.391392	-0.504642	-0.0200075	-0.463539	0.1384	-0.0137266	-0.375781	0.0228987	0.39505	-0.295002	-0.293184
Capana01g003456	0.505955	-0.542391	-0.551197	0.0451744	0.49025	0.808152	-0.499597	-0.336273	0.72441	-0.308184	-0.0355001	-0.292907	0.642042	-0.23946	-0.275589	0.256372	-0.434552	0.336211	-0.308274	0.135837	-0.497206	0.849098	-0.352597	0.511988	0.571203	-0.0328799	0.0774578	-0.263978	0.549847	-0.28855	0.253861	-0.406041	-0.360959	0.479788	-0.312763	0.384745	0.691308	0.564056	-0.341271	-0.194806	0.506702	0.508397	0.643754	0.077732	-0.274678	-0.273235	0.47278	-0.224267	-0.221516
Capana06g000615	-0.311128	-0.19858	0.0301941	-0.660307	-0.651641	-0.67993	-0.50307	-0.334824	-0.593258	-0.348127	0.561667	-0.317089	-0.511539	-0.253757	-0.0647588	-0.641122	-0.269636	-0.729951	-0.438078	-0.638481	-0.473827	-0.246878	-0.528986	0.435752	-0.510223	-0.64373	-0.542905	-0.406114	-0.666441	-0.438408	-0.656349	-0.556439	-0.476709	-0.565246	-0.343827	-0.638213	-0.726803	-0.535028	-0.364211	-0.488971	0.135886	-0.414376	0.27133	0.113289	-0.331851	-0.0800041	0.515618	-0.245483	-0.240234
Capana01g004038	0.425657	-0.546568	-0.611152	0.0421139	0.517889	0.772289	-0.515673	-0.346504	0.70691	-0.31335	-0.0522489	-0.298044	0.578547	-0.245338	-0.282981	0.287952	-0.442906	0.333016	-0.339652	0.123667	-0.518208	0.82774	-0.359792	0.498663	0.489022	-0.0174195	0.0728798	-0.259883	0.552725	-0.280832	0.257805	-0.410535	-0.366297	0.453222	-0.317783	0.350154	0.639059	0.536463	-0.349757	-0.217708	0.478253	0.50415	0.6203	0.0623704	-0.25945	-0.331633	0.424113	-0.231718	-0.228241
Capana00g003114	0.186044	0.291407	0.0941703	-0.365897	-0.282524	-0.441146	0.045434	0.45243	-0.769475	-0.42471	-0.461753	-0.472952	-0.694008	-0.380138	0.800844	-0.724044	0.230178	-0.566614	-0.282727	-0.299436	0.355311	-0.641629	0.139504	-0.194509	-0.497537	-0.299414	-0.624694	-0.155267	-0.48245	-0.409263	-0.603931	0.0219766	0.0477149	-0.731571	-0.34374	-0.148689	-0.421242	-0.773508	-0.426657	-0.456942	-0.31664	-0.535423	-0.219041	-0.316723	-0.305637	0.265636	-0.14976	-0.347821	-0.353101
Capana02g002284	0.0271457	-0.179169	0.0616926	0.582011	0.304865	0.510653	0.11266	-0.487977	0.70912	0.506088	0.336632	0.221769	0.519751	0.22421	-0.406177	0.700533	-0.479919	0.691887	0.30206	0.458487	0.00718463	0.65139	-0.126305	0.0152718	0.203715	0.529793	0.665227	-0.23097	0.832429	0.353377	0.540486	-0.110671	0.246519	0.711309	0.287122	0.553809	0.380163	0.740151	0.361432	0.362545	0.242179	0.0823041	0.0734274	-0.218617	0.612115	-0.360998	-0.0551949	0.529424	0.516911
Capana11g000422	0.199936	-0.563623	-0.835133	-0.187068	0.43511	0.48803	-0.595902	-0.205939	0.36045	-0.536658	-0.164224	-0.533771	0.187402	-0.414279	-0.133747	0.0191271	-0.437699	0.0927749	-0.516144	-0.072193	-0.504203	0.607476	-0.409335	0.596109	0.123789	-0.16009	-0.236463	-0.35123	0.359441	-0.485016	-0.0425956	-0.431099	-0.378	0.109627	-0.532877	0.134007	0.353773	0.167479	-0.584883	-0.509008	0.39594	0.274475	0.5836	-0.156122	-0.427103	-0.417476	0.407817	-0.429487	-0.434308
Capana03g003272	0.459861	-0.553267	-0.579937	-0.139697	0.185108	0.635247	-0.653146	-0.500639	0.548478	-0.39611	0.171704	-0.319157	0.480995	-0.268645	-0.256969	0.0705432	-0.571311	0.077481	-0.473733	0.0100475	-0.592113	0.771578	-0.425352	0.736835	0.473809	-0.164477	-0.0554101	-0.331488	0.272237	-0.364637	0.0803753	-0.627594	-0.570249	0.32626	-0.364878	0.18331	0.452952	0.419655	-0.395457	-0.270687	0.584169	0.457506	0.770338	0.137567	-0.37304	-0.0791909	0.691693	-0.294939	-0.288971
Capana03g002084	0.337151	-0.626445	-0.610972	0.110974	0.458613	0.762917	-0.461267	-0.380191	0.744291	-0.225706	-0.00617512	-0.218356	0.606098	-0.177498	-0.333365	0.356427	-0.474829	0.432717	-0.303745	0.180676	-0.476794	0.862299	-0.305973	0.420531	0.47357	0.0329027	0.152077	-0.207365	0.627616	-0.168627	0.327527	-0.349382	-0.318598	0.508743	-0.241849	0.386745	0.602172	0.566704	-0.262867	-0.158073	0.431925	0.512548	0.531725	0.0584533	-0.146701	-0.350214	0.351892	-0.166738	-0.165852
Capana08g001599	0.408535	-0.607784	-0.485488	0.231742	0.451538	0.832379	-0.354258	-0.389663	0.826374	-0.0941851	0.0550199	-0.143093	0.719159	-0.120749	-0.362449	0.420145	-0.479931	0.538147	-0.177268	0.261938	-0.382756	0.918123	-0.271807	0.367207	0.57088	0.126528	0.273602	-0.20991	0.72803	-0.081249	0.414236	-0.308022	-0.229187	0.619637	-0.138183	0.507874	0.691338	0.678152	-0.153544	-0.0398291	0.431709	0.489663	0.486956	0.0304431	-0.0412436	-0.313011	0.329379	-0.0343919	-0.0365044
Capana08g002208	0.480694	-0.501614	-0.453315	0.25192	0.499938	0.904632	-0.273442	-0.274661	0.846222	-0.105919	-0.0789376	-0.0951187	0.774715	-0.0474849	-0.298426	0.433898	-0.370321	0.559327	-0.10601	0.36659	-0.283381	0.876803	-0.123644	0.299816	0.665376	0.170449	0.283041	-0.100995	0.717827	-0.0491472	0.430425	-0.173549	-0.144825	0.660821	-0.139522	0.543929	0.787158	0.697979	-0.118224	0.0258346	0.397687	0.567295	0.445817	0.0465584	-0.051134	-0.209604	0.279271	-0.0856891	-0.0882395
Capana11g000601	-0.0531084	0.106311	0.0231183	-0.641863	-0.511136	-0.657642	-0.22243	0.217171	-0.870023	-0.539554	-0.0924005	-0.523859	-0.758397	-0.397284	0.51562	-0.873383	0.0688765	-0.777773	-0.407304	-0.537696	0.0122577	-0.594349	-0.147578	0.133728	-0.598399	-0.582813	-0.774172	-0.281987	-0.705377	-0.551463	-0.808504	-0.207512	-0.18631	-0.82818	-0.477178	-0.461959	-0.645857	-0.854419	-0.529539	-0.60917	-0.130863	-0.56284	0.0115363	-0.201645	-0.453224	0.15144	0.189873	-0.446908	-0.450654
Capana12g000159	-0.263546	0.0557456	0.198855	-0.660419	-0.586165	-0.722112	-0.394598	-0.1543	-0.694255	-0.371782	0.250525	-0.322695	-0.529661	-0.229354	0.219862	-0.706288	-0.182867	-0.681923	-0.35215	-0.597515	-0.333465	-0.384774	-0.415538	0.43031	-0.451294	-0.692369	-0.599973	-0.33562	-0.709974	-0.438895	-0.714199	-0.359073	-0.349453	-0.649039	-0.366814	-0.637733	-0.745778	-0.642199	-0.366253	-0.489119	0.338018	-0.443234	0.356177	0.0774817	-0.310696	0.111505	0.517095	-0.293414	-0.294722
Capana04g001609	0.384991	-0.674016	-0.566932	0.120652	0.374803	0.791053	-0.460542	-0.430726	0.774543	-0.198311	0.0780946	-0.194325	0.670104	-0.153165	-0.361204	0.339299	-0.520565	0.443586	-0.289804	0.204457	-0.467268	0.913623	-0.304529	0.439381	0.534219	0.0295752	0.178815	-0.223082	0.638603	-0.149399	0.333516	-0.376558	-0.329145	0.555337	-0.221506	0.422213	0.620311	0.60868	-0.232908	-0.125472	0.449444	0.513083	0.542601	0.0749808	-0.125306	-0.299176	0.406756	-0.138886	-0.139163
Capana08g000598	-0.30089	-0.130316	0.115836	-0.517983	-0.642682	-0.645652	-0.392754	-0.366829	-0.542152	-0.201427	0.598193	-0.265332	-0.462052	-0.226776	-0.0551155	-0.562955	-0.351724	-0.58858	-0.30958	-0.569772	-0.364558	-0.195299	-0.531812	0.513971	-0.459137	-0.532351	-0.420965	-0.447921	-0.552587	-0.352826	-0.578875	-0.537505	-0.383457	-0.493384	-0.234245	-0.530931	-0.694484	-0.453544	-0.26355	-0.394673	0.276924	-0.47852	0.323212	-0.0162934	-0.2054	-0.00490458	0.548098	-0.0816931	-0.08422
Capana06g002539	-0.231871	-0.154446	-0.0432179	-0.737838	-0.567985	-0.706132	-0.429315	-0.0411116	-0.752949	-0.516185	0.306737	-0.490932	-0.639098	-0.389273	0.0974693	-0.821181	-0.0718328	-0.797984	-0.441594	-0.700192	-0.340378	-0.397297	-0.450773	0.35526	-0.567221	-0.724923	-0.73651	-0.380891	-0.717303	-0.588689	-0.795623	-0.411971	-0.381064	-0.738527	-0.482071	-0.617813	-0.676107	-0.725534	-0.532569	-0.638479	0.00206497	-0.499924	0.181285	-0.0430424	-0.510549	-0.0891515	0.427048	-0.402127	-0.401293
Capana12g002313	0.0127285	0.364215	0.0694256	-0.414456	0.0977469	-0.501574	0.156194	0.823394	-0.788684	-0.459513	-0.628181	-0.505411	-0.642	-0.404788	0.586704	-0.716164	0.601271	-0.516168	-0.039808	-0.444062	0.289485	-0.733364	0.0530783	-0.217958	-0.436705	-0.385274	-0.695952	-0.0459375	-0.479843	-0.508776	-0.628797	0.319318	0.225678	-0.770185	-0.396824	-0.275727	-0.226282	-0.795711	-0.485491	-0.496991	-0.341559	-0.526144	-0.250183	-0.337244	-0.503216	-0.049085	-0.22083	-0.401245	-0.4103
Capana10g000102	0.329591	-0.0746569	-0.0212823	0.569336	-0.00833741	0.597266	0.3424	-0.0231049	0.598554	0.428006	-0.139657	0.648763	0.625116	0.41796	-0.0401674	0.557079	0.0930793	0.580372	0.204433	0.605252	0.331745	0.308301	0.643677	-0.3025	0.759341	0.515072	0.617645	0.667567	0.309363	0.687832	0.759886	0.334452	0.0170468	0.589627	0.593636	0.450681	0.482954	0.542583	0.578996	0.684811	-0.0962857	0.720201	-0.205787	0.402843	0.319616	0.656996	-0.250232	0.266932	0.278714
Capana01g000552	0.312495	0.140847	0.2886	0.742267	0.404759	0.661329	0.28864	-0.431537	0.790337	0.651909	0.348345	0.332305	0.617959	0.280066	-0.369142	0.790909	-0.337368	0.684424	0.508438	0.574582	0.177101	0.592088	-0.0309079	-0.0132842	0.397627	0.720194	0.817052	-0.201245	0.808844	0.414681	0.653569	-0.109717	0.326527	0.822637	0.443239	0.691085	0.604942	0.90502	0.505572	0.589015	0.213983	0.113276	0.0664116	-0.222999	0.632944	-0.140686	-0.0688364	0.689811	0.683908
Capana07g000601	-0.216334	-0.085227	0.194574	-0.608657	-0.596842	-0.625924	-0.496508	-0.353761	-0.537141	-0.321484	0.392244	-0.293442	-0.39657	-0.234644	0.1164	-0.606283	-0.337433	-0.598173	-0.412252	-0.592105	-0.469534	-0.205266	-0.528371	0.484447	-0.368897	-0.690833	-0.50006	-0.40144	-0.604117	-0.404039	-0.606653	-0.504221	-0.466519	-0.528881	-0.322484	-0.575145	-0.706876	-0.498191	-0.339039	-0.462117	0.436254	-0.367979	0.453469	0.17487	-0.251147	0.0587496	0.600849	-0.22181	-0.218963
Capana03g003392	-0.171589	-0.0731628	-0.0243452	0.546569	0.15094	0.543912	0.17157	-0.458676	0.807541	0.557976	0.261274	0.703065	0.663307	0.682275	-0.538419	0.905676	-0.246182	0.678939	0.344061	0.733117	0.00872273	0.544349	0.353086	-0.133039	0.440893	0.611847	0.80009	0.379929	0.560616	0.712174	0.722563	0.202117	0.185383	0.875001	0.460992	0.309133	0.360283	0.816719	0.67351	0.700005	0.0988929	0.633069	-0.0695709	0.271279	0.647875	0.0308825	-0.166683	0.36326	0.366019
Capana07g002506	-0.0614631	0.393036	0.0991039	-0.447546	0.0910628	-0.547049	0.156696	0.829905	-0.797746	-0.442568	-0.595046	-0.441926	-0.63736	-0.331654	0.528101	-0.699634	0.656187	-0.561185	-0.0128671	-0.441556	0.257655	-0.77177	0.0754015	-0.263635	-0.448303	-0.385956	-0.687098	0.0063331	-0.537505	-0.479345	-0.635263	0.357534	0.237514	-0.756268	-0.384673	-0.354303	-0.250247	-0.790593	-0.441377	-0.456867	-0.39583	-0.498429	-0.297578	-0.254757	-0.494112	-0.0787746	-0.250896	-0.412662	-0.419285
Capana00g004199	0.535611	-0.530333	-0.521915	0.0401461	0.47781	0.814276	-0.493644	-0.329543	0.722041	-0.309195	-0.0302461	-0.293719	0.658761	-0.237179	-0.267089	0.237443	-0.428407	0.327209	-0.295732	0.137292	-0.487908	0.848236	-0.350549	0.517811	0.596147	-0.0415844	0.0732365	-0.269012	0.539761	-0.296521	0.243325	-0.405059	-0.356824	0.483274	-0.315088	0.391341	0.705513	0.568012	-0.340383	-0.188603	0.517099	0.502917	0.652938	0.0821886	-0.282641	-0.249438	0.492498	-0.224203	-0.221745
Capana01g001843	0.346609	-0.338582	-0.548706	0.309552	0.711074	0.755658	-0.09233	0.0470734	0.640482	-0.124224	-0.407189	-0.184753	0.468373	-0.168892	-0.107358	0.424883	-0.118964	0.55861	-0.0715989	0.296549	-0.0860873	0.595945	-0.0165109	0.0667443	0.393685	0.253714	0.196324	-0.0190653	0.712553	-0.0604459	0.41129	0.0315541	0.0254502	0.431941	-0.125999	0.530739	0.706369	0.464733	-0.179876	-0.0590711	0.142417	0.418088	0.193969	-0.164959	-0.0731203	-0.332035	-0.0702257	-0.0935596	-0.0976895
Capana03g000791	0.0802168	-0.393237	-0.138946	0.563128	0.318582	0.56739	0.0359178	-0.448891	0.743044	0.419842	0.301124	0.168354	0.549972	0.0919554	-0.441761	0.662362	-0.455797	0.715463	0.169997	0.357012	-0.0756766	0.721828	-0.166487	0.0603323	0.293911	0.453947	0.611743	-0.167328	0.831159	0.314157	0.600094	-0.154609	0.083162	0.664998	0.287511	0.564108	0.439319	0.711389	0.269555	0.284287	0.216598	0.196965	0.103202	-0.145772	0.453206	-0.350549	-0.025119	0.465288	0.457343
Capana12g002714	0.0631088	0.448404	0.616643	0.746978	0.189854	0.281703	0.55994	-0.290093	0.449878	0.829733	0.376068	0.444388	0.310379	0.420808	-0.218239	0.682203	-0.18393	0.552128	0.713591	0.565575	0.465692	0.203681	0.128003	-0.269515	0.0705885	0.781844	0.801507	-0.162677	0.623001	0.542822	0.498588	0.0935043	0.603967	0.630829	0.561753	0.559185	0.275692	0.662626	0.678108	0.68287	-0.00772727	-0.224037	-0.251176	-0.367593	0.848563	-0.0740649	-0.307884	0.832332	0.819235
Capana01g001841	-0.139174	0.322987	0.620344	0.712348	-0.103316	0.143412	0.540861	-0.341434	0.456251	0.938759	0.429703	0.83887	0.422527	0.645774	-0.296701	0.739848	-0.0783885	0.564341	0.634863	0.53504	0.348275	0.136999	0.326827	-0.336915	0.2983	0.679032	0.895414	0.303757	0.344187	0.861305	0.690453	0.234105	0.34751	0.632696	0.837331	0.301603	0.092507	0.626173	0.927861	0.899968	0.0111277	0.151387	-0.294099	0.182989	0.859828	0.295348	-0.30151	0.823037	0.825068
Capana04g000802	0.298311	-0.434357	-0.484212	-0.179155	0.445218	0.502577	-0.490093	-0.133459	0.413752	-0.482418	-0.190358	-0.425767	0.412916	-0.334542	-0.218972	0.0233789	-0.262519	0.254155	-0.263844	-0.11268	-0.553926	0.58889	-0.436905	0.621826	0.417835	-0.403578	-0.19661	-0.217824	0.318061	-0.444485	-0.00777945	-0.230373	-0.336075	0.158344	-0.46803	0.139381	0.467384	0.225955	-0.508514	-0.417357	0.698195	0.397416	0.774616	-0.00429897	-0.459462	-0.281675	0.594224	-0.400555	-0.402554
Capana08g001733	-0.170819	-0.0466144	0.437399	0.525259	-0.154535	0.255795	0.207489	-0.652121	0.617824	0.746596	0.720469	0.642471	0.574221	0.589426	-0.596924	0.700214	-0.400661	0.55646	0.474549	0.485402	-0.00278784	0.481862	0.0217543	-0.0520843	0.291594	0.469226	0.802051	0.0243832	0.482209	0.643703	0.552415	-0.0319784	0.199038	0.761089	0.550203	0.286472	0.130138	0.753047	0.720196	0.679141	0.215809	0.175689	-0.0227415	0.155895	0.772883	-0.028248	0.0295168	0.663876	0.660863
Capana10g002239	0.393942	-0.310082	-0.656534	-0.0208659	0.651856	0.555782	-0.209962	0.291275	0.275068	-0.497551	-0.615959	-0.528971	0.154327	-0.413145	0.141602	0.00368478	0.0140274	0.210855	-0.270778	0.0590684	-0.087041	0.344846	-0.0663615	0.106015	0.162513	-0.0350688	-0.236702	-0.134394	0.441089	-0.419087	0.0145772	0.00818705	-0.0203569	0.0526854	-0.46444	0.358379	0.559157	0.0706218	-0.539482	-0.420433	0.0322238	0.212693	0.198172	-0.301371	-0.407645	-0.362529	-0.0180896	-0.426337	-0.433082
Capana08g002111	-0.122706	0.338815	0.525212	0.756821	-0.174507	0.147466	0.668649	-0.187889	0.391454	0.936707	0.303146	0.91712	0.343312	0.678249	-0.215384	0.730686	0.0826351	0.562893	0.632514	0.605468	0.524496	0.0090129	0.570483	-0.49286	0.304769	0.749848	0.889014	0.521366	0.269269	0.964262	0.743585	0.380705	0.373557	0.575754	0.917177	0.323857	0.0897631	0.537773	0.981231	0.964926	-0.215954	0.241624	-0.489971	0.185754	0.828912	0.47975	-0.471032	0.778332	0.783559
Capana11g002125	0.308017	-0.618454	-0.667058	0.0219178	0.47925	0.696663	-0.523249	-0.347141	0.654649	-0.32354	-0.0550085	-0.320146	0.501784	-0.253949	-0.281926	0.272637	-0.470605	0.34024	-0.377902	0.100226	-0.518268	0.806766	-0.361729	0.457081	0.373911	-0.0356705	0.0425091	-0.265594	0.568225	-0.27182	0.227971	-0.3884	-0.347539	0.404795	-0.338056	0.319023	0.540993	0.467224	-0.368117	-0.270594	0.428151	0.451714	0.557829	0.01899	-0.225406	-0.409787	0.366237	-0.246889	-0.246267
Capana09g000386	0.373103	-0.594205	-0.636579	0.0259059	0.496949	0.740953	-0.526457	-0.350699	0.686865	-0.324488	-0.0462928	-0.31679	0.553321	-0.251292	-0.290075	0.273595	-0.464139	0.338824	-0.357618	0.11092	-0.525825	0.830473	-0.370444	0.48715	0.44058	-0.0364968	0.0536203	-0.272955	0.567029	-0.285701	0.236191	-0.40268	-0.356483	0.435519	-0.338487	0.338452	0.598318	0.50768	-0.365982	-0.250474	0.464259	0.476086	0.599684	0.0390739	-0.246947	-0.378536	0.410205	-0.244153	-0.24266
Capana00g000858	0.510716	-0.558023	-0.358966	0.157901	0.361249	0.862339	-0.362087	-0.388233	0.824621	-0.132258	0.098219	-0.131979	0.821247	-0.0544084	-0.358382	0.32765	-0.472026	0.478768	-0.122812	0.299728	-0.375812	0.931562	-0.245609	0.426895	0.696016	0.052732	0.236184	-0.217676	0.657292	-0.123982	0.329286	-0.289901	-0.209856	0.661095	-0.196037	0.496404	0.744624	0.704871	-0.151307	-0.0148089	0.513473	0.504238	0.5621	0.080465	-0.0815447	-0.199292	0.46775	-0.0914444	-0.0957409
Capana00g000857	0.386718	-0.388093	-0.137554	0.349968	0.3082	0.866213	-0.150745	-0.472066	0.917484	0.15129	0.226021	0.122485	0.895169	0.226681	-0.448113	0.549042	-0.490447	0.62649	0.132983	0.543159	-0.198842	0.922189	-0.077667	0.267762	0.678591	0.294957	0.493111	-0.14338	0.770374	0.14107	0.460227	-0.14536	0.03024	0.864688	-0.00110969	0.573427	0.727977	0.871406	0.148367	0.26156	0.450352	0.478857	0.394023	0.0384243	0.250611	-0.165782	0.319013	0.127696	0.118595
Capana02g002125	0.453079	-0.599509	-0.47185	0.033668	0.343582	0.817161	-0.457291	-0.363103	0.76405	-0.26289	0.0335322	-0.179264	0.762406	-0.0728948	-0.338599	0.25725	-0.453636	0.389048	-0.23148	0.251453	-0.456214	0.895568	-0.239358	0.463096	0.654097	-0.0456198	0.121914	-0.177971	0.560382	-0.191631	0.248414	-0.289994	-0.283635	0.583852	-0.29852	0.384957	0.684221	0.6128	-0.240839	-0.108563	0.509091	0.560544	0.59423	0.14068	-0.18472	-0.206518	0.497594	-0.240603	-0.242907
Capana02g002126	-0.403756	0.168425	0.121539	0.0155161	-0.234089	0.171272	0.0920903	-0.273687	0.346203	0.206356	0.145388	0.641849	0.40539	0.927668	-0.338115	0.444664	-0.0910866	0.185138	0.29964	0.74701	0.053544	0.154151	0.601141	-0.163444	0.193977	0.269347	0.358049	0.472371	0.0412104	0.514985	0.131363	0.438911	0.331719	0.60336	0.0505111	-0.13771	-0.000563585	0.398472	0.533793	0.518317	0.010111	0.512464	-0.139844	0.337852	0.500691	0.191276	-0.0587591	-0.131708	-0.13812
Capana01g000351	0.180274	-0.209873	-0.124523	0.568328	0.394191	0.74462	-0.0239216	-0.555286	0.92573	0.42788	0.297862	0.362042	0.719311	0.290301	-0.51898	0.844599	-0.412694	0.679343	0.186785	0.530604	-0.169559	0.768153	-0.0391602	0.109419	0.508894	0.543888	0.731131	-5.94903e-05	0.739976	0.405821	0.721843	-0.172205	-0.00834225	0.851321	0.330414	0.508318	0.582799	0.911128	0.391132	0.474657	0.282383	0.519837	0.215108	0.120843	0.44459	-0.168721	0.0410209	0.40332	0.408979
Capana00g003194	0.174854	-0.585419	-0.33018	0.39853	0.244235	0.710877	-0.152995	-0.478354	0.825654	0.192306	0.219395	0.128365	0.699171	0.117146	-0.442182	0.578006	-0.507812	0.676647	-0.0114482	0.410389	-0.213625	0.859814	-0.0968518	0.16629	0.477373	0.296666	0.489845	-0.0710079	0.777313	0.233046	0.545363	-0.162087	-0.0734319	0.714703	0.111134	0.523254	0.519087	0.721032	0.145878	0.193061	0.301173	0.446661	0.243171	0.0301065	0.284021	-0.243565	0.141913	0.188112	0.182274
Capana00g003117	-0.460818	0.145975	0.535748	-0.0321138	-0.666791	-0.493368	0.0369844	-0.466203	-0.156142	0.429042	0.646848	0.525886	-0.045203	0.427224	-0.228297	0.0589612	-0.195719	-0.115798	0.156817	-0.0580083	-0.115002	-0.165674	-0.0277019	0.0744864	-0.0869441	-0.0789545	0.239454	0.128812	-0.381744	0.413356	0.0169397	-0.0831873	-0.120653	0.016828	0.397697	-0.397725	-0.582584	-0.00718461	0.49305	0.357703	0.221777	-0.056772	0.0236064	0.399772	0.400728	0.338115	0.195507	0.345276	0.351948
Capana01g001914	-0.367421	0.233801	0.616834	0.274229	-0.554759	-0.314324	0.280543	-0.433792	0.0303019	0.685483	0.634808	0.710932	0.0896913	0.535259	-0.26909	0.312917	-0.128712	0.129881	0.367693	0.152154	0.103971	-0.109927	0.140887	-0.102374	0.0439212	0.216103	0.517185	0.244045	-0.168421	0.649154	0.290957	0.042614	0.0435272	0.221003	0.648806	-0.15498	-0.391914	0.204439	0.72455	0.617882	0.104494	0.00993246	-0.14374	0.333092	0.603896	0.410476	-0.00649071	0.585855	0.592646
Capana03g002653	-0.412058	0.193025	0.601257	0.182771	-0.617795	-0.389861	0.223215	-0.480279	-0.0480673	0.631903	0.774532	0.613547	-0.00773836	0.496922	-0.334892	0.2227	-0.171595	-0.00292428	0.33547	0.0929155	0.067876	-0.130097	0.0516107	-0.0847806	-0.109707	0.182235	0.437196	0.102262	-0.206145	0.543614	0.156536	-0.0581092	0.0544383	0.171114	0.548625	-0.203861	-0.458975	0.154997	0.650413	0.529603	0.00313557	-0.13184	-0.186316	0.241639	0.574146	0.268449	0.0158846	0.556724	0.561524
Capana10g001370	-0.191476	0.151875	0.319784	0.642462	-0.130547	0.201724	0.497153	-0.214499	0.493903	0.815706	0.298447	0.964779	0.466437	0.693108	-0.388963	0.764722	0.123297	0.55728	0.508525	0.537202	0.275455	0.1111	0.530768	-0.391568	0.458257	0.609142	0.845397	0.678126	0.193196	0.948382	0.799224	0.376231	0.167251	0.609965	0.871853	0.180309	0.146078	0.574966	0.927726	0.927845	-0.147853	0.524513	-0.36861	0.451389	0.654703	0.45277	-0.362206	0.617874	0.632092
Capana07g000715	0.522023	-0.127045	-0.469317	0.0433047	0.72202	0.526517	-0.0515923	0.487561	0.193654	-0.422925	-0.724967	-0.526581	0.138357	-0.440245	0.303741	-0.0693695	0.177522	0.159291	-0.15274	0.0473029	0.0932254	0.209316	-0.00493284	-0.0357781	0.1975	0.0545098	-0.230105	-0.138711	0.409588	-0.422672	0.00693019	0.0988341	0.110008	0.00612103	-0.390675	0.417625	0.631448	0.0374207	-0.49605	-0.35169	-0.0815522	0.0741116	0.0683641	-0.336998	-0.401994	-0.297382	-0.140114	-0.333375	-0.34171
Capana07g001126	-0.0297003	0.237927	0.501485	0.83105	0.018867	0.262781	0.578755	-0.301353	0.543594	0.964693	0.411766	0.795601	0.451906	0.517013	-0.347204	0.809146	-0.0445869	0.670314	0.635652	0.503861	0.369541	0.208411	0.285065	-0.325919	0.366642	0.744184	0.950101	0.303101	0.457303	0.858734	0.818174	0.193493	0.303932	0.652525	0.907409	0.435265	0.235283	0.687812	0.900118	0.899873	-0.0339352	0.191946	-0.299704	0.108538	0.797098	0.264369	-0.339991	0.895983	0.900802
Capana05g001014	-0.359536	0.523389	0.596206	-0.299763	-0.271157	-0.806274	0.249243	0.407453	-0.746778	0.0654664	0.00527085	0.016413	-0.528951	0.0290772	0.26197	-0.494354	0.444524	-0.534426	0.229259	-0.406082	0.198187	-0.763025	-0.016758	-0.242005	-0.448619	-0.242435	-0.314428	-0.00197267	-0.63022	-0.0952187	-0.478249	0.243932	0.240366	-0.559216	0.0327863	-0.514197	-0.543234	-0.580124	0.0485755	-0.0527903	-0.235901	-0.598556	-0.315246	0.0079744	-0.0425803	0.0453721	-0.159949	0.058883	0.054895
Capana06g001979	0.356301	-0.0647411	-0.279854	-0.210905	0.712016	0.32023	-0.19808	0.478011	0.120186	-0.468851	-0.528958	-0.47069	0.229107	-0.364017	0.0680133	-0.19715	0.286574	-0.0552979	-0.078682	-0.187502	-0.219149	0.155109	-0.242695	0.153694	0.291391	-0.213367	-0.335895	-0.148803	0.133423	-0.542289	-0.152901	0.0784272	0.00553661	-0.0378327	-0.459682	0.0647555	0.57593	0.0217924	-0.509373	-0.37058	0.120892	0.0906371	0.268484	-0.0382402	-0.5725	-0.404125	0.126473	-0.398901	-0.402415
Capana03g000299	-0.0749807	0.341339	0.593072	0.805851	0.0441142	0.222778	0.602381	-0.324526	0.490316	0.957219	0.441874	0.6976	0.372352	0.545716	-0.321672	0.784281	-0.114523	0.63083	0.707181	0.56499	0.43279	0.184084	0.249591	-0.353755	0.183403	0.784821	0.9194	0.119516	0.531951	0.7799	0.679945	0.187183	0.484014	0.661652	0.785194	0.467241	0.192116	0.677155	0.863329	0.844173	-0.05881	-0.0120225	-0.33882	-0.0999229	0.899885	0.0956452	-0.370076	0.898667	0.89441
Capana09g000285	-0.143343	0.178663	0.294589	0.762677	0.106504	0.375653	0.471098	-0.342324	0.67258	0.858809	0.325027	0.852148	0.537374	0.66168	-0.450424	0.933973	-0.0627782	0.702418	0.568973	0.651833	0.255678	0.303833	0.39237	-0.314812	0.398895	0.761031	0.952495	0.430811	0.490768	0.885986	0.844718	0.269033	0.292955	0.776661	0.79455	0.365413	0.289298	0.767754	0.890409	0.902416	-0.0351255	0.431726	-0.271241	0.216118	0.785903	0.190841	-0.353543	0.708374	0.714926
Capana03g003343	0.00649155	-0.466198	-0.523668	0.201795	0.427554	0.565988	-0.309297	-0.411991	0.655143	-0.0317001	0.0519035	-0.0671132	0.418825	0.000577226	-0.371547	0.508167	-0.465817	0.46585	-0.169645	0.272407	-0.355132	0.704339	-0.204714	0.238626	0.179885	0.20622	0.272347	-0.163319	0.646137	0.0199216	0.351308	-0.226047	-0.114884	0.505187	-0.121278	0.307659	0.378177	0.526114	-0.0743296	-0.0404824	0.276871	0.375919	0.300943	-0.0470965	0.129687	-0.46713	0.104344	-0.0204078	-0.023406
Capana05g001701	0.191679	-0.342883	-0.152962	-0.424448	-0.0974412	0.03362	-0.742966	-0.519944	0.0783603	-0.420379	0.22818	-0.358929	0.147113	-0.351045	-0.0354855	-0.262427	-0.537554	-0.231727	-0.546035	-0.424257	-0.760831	0.381556	-0.67958	0.772354	0.181632	-0.586309	-0.302875	-0.430811	-0.169657	-0.467576	-0.231464	-0.686527	-0.703082	-0.113587	-0.377386	-0.24476	-0.106462	-0.00294781	-0.453107	-0.444324	0.821784	0.133078	0.892796	0.331523	-0.390927	-0.0242386	0.831204	-0.282241	-0.271938
Capana03g003488	-0.0594692	0.0953145	0.480291	0.619834	-0.07871	0.218409	0.251993	-0.6245	0.553537	0.815296	0.670605	0.62081	0.445159	0.446973	-0.448698	0.71068	-0.35694	0.499525	0.434244	0.384129	0.0549389	0.371505	-0.0294985	-0.0735099	0.24364	0.560865	0.833051	-0.0183968	0.430077	0.643574	0.625869	-0.149467	0.12074	0.650827	0.677119	0.318044	0.107959	0.708794	0.726462	0.701459	0.17389	0.096782	-0.0394214	0.140676	0.75581	0.0571628	-0.0511252	0.798661	0.80354
Capana08g001238	0.127606	0.378155	0.631036	0.773869	0.183592	0.231907	0.58082	-0.236339	0.383838	0.838527	0.383206	0.355829	0.25466	0.258348	-0.167509	0.595099	-0.165786	0.553738	0.685998	0.42279	0.485377	0.179968	0.0262013	-0.270431	0.0520569	0.732722	0.761727	-0.233206	0.631212	0.488983	0.497671	0.0370517	0.556791	0.525712	0.601332	0.606188	0.26318	0.589604	0.616794	0.613684	-0.0233345	-0.338373	-0.261738	-0.426864	0.788647	-0.0914263	-0.310213	0.903365	0.890144
Capana10g000854	-0.598283	0.257582	0.208465	-0.0697958	-0.386242	-0.169803	0.173792	-0.100385	0.0636635	0.248894	0.10965	0.761314	0.185416	0.903361	-0.268012	0.304059	0.157955	0.0259416	0.289888	0.50228	0.0658835	-0.170648	0.643589	-0.257808	0.106695	0.131246	0.263329	0.694874	-0.298862	0.594068	0.0962169	0.552636	0.228943	0.320866	0.212438	-0.410604	-0.260849	0.123636	0.597945	0.53768	-0.0958829	0.482787	-0.26549	0.532865	0.403091	0.360889	-0.149766	-0.106423	-0.103745
Capana00g003643	0.133902	0.380381	-0.00397494	-0.148004	0.284504	-0.218372	0.359384	0.912713	-0.556986	-0.342196	-0.791388	-0.397852	-0.481857	-0.320418	0.553509	-0.45546	0.687788	-0.203404	0.120599	-0.17932	0.489277	-0.626429	0.280192	-0.384294	-0.277551	-0.154963	-0.488223	0.122583	-0.204358	-0.329834	-0.372608	0.519089	0.395694	-0.557185	-0.271085	0.00945653	0.0400808	-0.600149	-0.358196	-0.32683	-0.438932	-0.345488	-0.374525	-0.450592	-0.380147	-0.00870827	-0.416189	-0.321225	-0.331536
Capana06g002018	-0.119351	0.161289	0.412349	0.796727	0.106776	0.328517	0.50158	-0.374214	0.621901	0.897373	0.400078	0.703076	0.482785	0.559304	-0.40481	0.864421	-0.179781	0.729991	0.618488	0.603864	0.314848	0.334866	0.244344	-0.313792	0.26101	0.762517	0.935015	0.177157	0.627563	0.794614	0.754055	0.194845	0.411346	0.74769	0.740905	0.476446	0.254153	0.748015	0.828996	0.811392	-0.0038179	0.152396	-0.278139	-0.0184862	0.874999	0.0206779	-0.344868	0.814311	0.810503
Capana08g002649	0.308102	-0.241912	-0.434848	0.297152	0.647686	0.706688	-0.286979	-0.385834	0.713141	-0.0137005	0.00541736	-0.15442	0.439464	-0.15182	-0.287825	0.540843	-0.417024	0.428287	-0.122953	0.229229	-0.331808	0.700077	-0.317193	0.340076	0.288533	0.296424	0.313181	-0.296168	0.662277	-0.0887643	0.409204	-0.381746	-0.157725	0.510029	-0.0846905	0.429888	0.58042	0.625249	-0.122025	-0.0123129	0.360648	0.343437	0.440519	-0.112712	0.0343649	-0.404779	0.16624	0.0820364	0.086063
Capana07g001815	-0.0775171	-0.0904133	0.0688637	0.626002	0.0272371	0.505297	0.240873	-0.427319	0.777471	0.658765	0.254168	0.812782	0.699872	0.637814	-0.440251	0.868842	-0.195408	0.718553	0.332616	0.652055	0.0639813	0.496685	0.391462	-0.144903	0.59991	0.587842	0.854112	0.509088	0.470684	0.826408	0.841816	0.2082	0.0610955	0.815024	0.663155	0.324868	0.33049	0.78005	0.765903	0.793694	0.150809	0.688799	-0.0627952	0.42142	0.632742	0.303653	-0.147394	0.478999	0.487383
Capana03g002049	0.0168877	-0.101258	0.0431344	0.683658	0.18654	0.586586	0.221221	-0.453816	0.853189	0.677632	0.338269	0.724574	0.715694	0.524052	-0.542016	0.921379	-0.19717	0.721218	0.355767	0.594081	0.0114866	0.566226	0.239207	-0.110762	0.59004	0.646609	0.89102	0.366157	0.565583	0.741183	0.882454	0.0792225	0.0472292	0.852627	0.660612	0.407084	0.459822	0.874797	0.713511	0.769508	0.109977	0.628435	-0.0400911	0.336359	0.586463	0.131153	-0.145227	0.561179	0.572452
Capana06g001465	-0.424216	0.291595	0.269123	0.35996	-0.117339	0.200546	0.324323	-0.336808	0.462925	0.56296	0.254706	0.810454	0.406838	0.956237	-0.400618	0.726219	-0.0947002	0.40782	0.503432	0.818913	0.215553	0.158904	0.59766	-0.306484	0.159575	0.575865	0.670979	0.46256	0.246353	0.755726	0.415056	0.437092	0.454782	0.722828	0.383778	0.0504865	0.0415174	0.569584	0.784891	0.75675	-0.067978	0.421682	-0.291974	0.224393	0.776148	0.154686	-0.276093	0.265027	0.260473
Capana12g001078	-0.0620093	-0.00204901	0.023833	0.694192	0.226646	0.584731	0.312617	-0.351486	0.823726	0.667639	0.202136	0.756352	0.66892	0.623815	-0.492125	0.959201	-0.121811	0.753167	0.425343	0.717828	0.129363	0.489801	0.400339	-0.214291	0.523801	0.711464	0.886923	0.45504	0.586099	0.78822	0.85831	0.247757	0.2012	0.864087	0.625134	0.410115	0.453169	0.840941	0.74565	0.796567	0.026791	0.639817	-0.146513	0.256156	0.646433	0.129496	-0.269714	0.499017	0.505768
Capana00g003839	-0.0652669	0.16447	0.0369719	-0.57717	-0.408111	-0.668463	-0.0892269	0.380067	-0.897966	-0.493405	-0.168533	-0.506439	-0.803488	-0.39861	0.506968	-0.843418	0.248234	-0.75959	-0.309645	-0.527641	0.12344	-0.691382	-0.0695529	-0.0469955	-0.642671	-0.50242	-0.752736	-0.213674	-0.679834	-0.519711	-0.770575	-0.0795359	-0.0662779	-0.845921	-0.425893	-0.422923	-0.584359	-0.874188	-0.496588	-0.567709	-0.340923	-0.60237	-0.177452	-0.257337	-0.450527	0.0714061	0.000239869	-0.407863	-0.410673
Capana06g001308	-0.0423434	-0.247361	-0.421957	0.259607	0.488501	0.50964	-0.225393	-0.416854	0.608881	0.0557035	0.0548825	-0.0334843	0.310923	0.0517867	-0.334558	0.580034	-0.442435	0.431228	-0.0777061	0.320946	-0.2712	0.596761	-0.181012	0.187855	0.0482354	0.329094	0.32955	-0.207743	0.637123	0.0552224	0.345153	-0.221897	-0.00472782	0.498262	-0.0777441	0.298856	0.328849	0.531008	-0.00401089	0.0251426	0.229684	0.274995	0.240212	-0.14175	0.236806	-0.492966	0.00860121	0.0694143	0.0664983
Capana08g002278	-0.115572	0.277551	0.144075	-0.595135	-0.160678	-0.702261	-0.0522504	0.566981	-0.894884	-0.497309	-0.356101	-0.531769	-0.703831	-0.423681	0.52288	-0.853232	0.377437	-0.675971	-0.173227	-0.622186	0.0618317	-0.709446	-0.174577	0.0265174	-0.521582	-0.596934	-0.784784	-0.198254	-0.654492	-0.583688	-0.781443	0.084854	0.0228306	-0.865352	-0.452764	-0.484686	-0.486046	-0.876458	-0.530549	-0.595726	-0.103785	-0.612561	-0.0332586	-0.224334	-0.519714	-0.026122	0.0594771	-0.410612	-0.418983
Capana05g000287	-0.31564	0.0333534	-0.129076	0.146043	-0.0791315	0.355674	0.0600248	-0.276538	0.500606	0.191761	-0.00173944	0.635643	0.456519	0.827659	-0.310573	0.594061	-0.116537	0.341809	0.174931	0.786034	0.0341646	0.275972	0.637933	-0.173482	0.284767	0.368201	0.433108	0.560951	0.18683	0.5703	0.337646	0.404504	0.213811	0.654691	0.117577	-0.00603076	0.124567	0.474115	0.506324	0.517938	-0.00780895	0.700372	-0.124569	0.362778	0.465848	0.208931	-0.145598	-0.130254	-0.130657
Capana08g002318	0.0747008	0.365819	0.0197581	-0.0295347	0.573765	-0.107129	0.400471	0.942945	-0.342656	-0.194861	-0.725645	-0.3034	-0.266217	-0.246198	0.31179	-0.25422	0.760535	-0.076809	0.289797	-0.146428	0.401827	-0.483448	0.180995	-0.424299	-0.148688	-0.00478794	-0.314566	0.116418	-0.0267381	-0.274823	-0.208049	0.576803	0.495025	-0.345654	-0.182349	0.0469701	0.26758	-0.357351	-0.253244	-0.196141	-0.457696	-0.293511	-0.406542	-0.378769	-0.325319	-0.281429	-0.486475	-0.179655	-0.190179
Capana05g000373	0.290692	-0.307233	-0.203941	0.530689	0.372187	0.847899	-0.0371852	-0.438212	0.978157	0.341316	0.158755	0.405318	0.872685	0.300209	-0.48118	0.786195	-0.32019	0.722088	0.146879	0.54889	-0.175805	0.815755	0.0743035	0.139766	0.763365	0.456469	0.687507	0.187775	0.68771	0.420336	0.767945	-0.059817	-0.0918773	0.871786	0.327918	0.512084	0.705041	0.911379	0.370927	0.49015	0.341045	0.729783	0.273889	0.282891	0.302327	0.0259836	0.114489	0.277829	0.285185
Capana09g001771	-0.19088	0.0719208	0.151021	-0.707809	-0.357236	-0.783256	-0.250453	0.2862	-0.869115	-0.490025	0.0220021	-0.500622	-0.703652	-0.394408	0.30286	-0.869178	0.242409	-0.856239	-0.321412	-0.718611	-0.172617	-0.629385	-0.337125	-0.00227323	-0.628072	-0.659341	-0.774846	-0.313932	-0.740858	-0.601047	-0.816974	-0.177891	-0.166986	-0.825759	-0.462226	-0.606822	-0.61771	-0.822227	-0.519337	-0.610553	-0.258081	-0.630535	-0.0865525	-0.0239072	-0.498473	-0.195958	0.114364	-0.390313	-0.387996
Capana00g000130	-0.289928	0.122353	0.107573	-0.720583	-0.453357	-0.841573	-0.238135	0.267091	-0.909635	-0.462065	0.0337062	-0.411664	-0.725246	-0.330747	0.302944	-0.870059	0.201821	-0.849229	-0.306587	-0.706281	-0.157317	-0.656871	-0.285635	0.171452	-0.579851	-0.662686	-0.765669	-0.218648	-0.839801	-0.53172	-0.814355	-0.148272	-0.20866	-0.851228	-0.405943	-0.702538	-0.697734	-0.856333	-0.456577	-0.559289	-0.0962954	-0.563203	0.0209788	-0.00727878	-0.504578	0.00379863	0.22491	-0.389122	-0.389934
Capana04g001744	0.288854	-0.12886	-0.00149741	0.808933	0.230426	0.696823	0.293728	-0.343799	0.838936	0.659727	0.155946	0.607817	0.676894	0.314561	-0.294356	0.863025	-0.17864	0.787196	0.274521	0.569602	0.175845	0.558623	0.281312	-0.178842	0.647669	0.704845	0.876313	0.338046	0.651369	0.71027	0.960673	0.0373092	0.00777048	0.770367	0.716804	0.624097	0.5536	0.822274	0.635949	0.722589	0.0510712	0.579608	-0.0796539	0.221584	0.532848	0.27519	-0.22926	0.611366	0.623603
Capana02g003021	0.231147	-0.0324365	-0.367462	0.0425958	0.44949	0.653261	-0.337215	-0.338523	0.629803	-0.162462	-0.0701968	0.0356432	0.487263	0.181729	-0.25901	0.448079	-0.277207	0.193806	-0.11503	0.402481	-0.348711	0.544376	-0.012638	0.337243	0.39584	0.19052	0.200358	-0.0154444	0.317337	-0.0469809	0.238409	-0.190502	-0.147391	0.537384	-0.214358	0.151436	0.50692	0.564289	-0.0470726	0.0885583	0.35441	0.594963	0.452804	0.180998	-0.0366558	-0.107108	0.259189	-0.225053	-0.216638
Capana11g001030	0.287955	0.115867	-0.0230608	0.727127	0.65928	0.690319	0.378288	-0.0129567	0.664496	0.431544	-0.222132	0.143963	0.433474	0.137521	-0.0591384	0.716221	-0.109289	0.737044	0.393842	0.609067	0.375347	0.439933	0.202439	-0.268956	0.252812	0.750155	0.622755	-0.0484778	0.894353	0.33054	0.609393	0.185406	0.481527	0.640038	0.281509	0.759605	0.653197	0.662595	0.304694	0.392467	-0.0471877	0.118053	-0.166739	-0.404165	0.506776	-0.241488	-0.415796	0.440867	0.42857
Capana10g001629	0.300933	-0.234186	-0.113403	0.641338	0.303926	0.679151	0.121524	-0.307121	0.834485	0.500413	0.174376	0.531356	0.730087	0.196308	-0.425362	0.762475	-0.097865	0.680914	0.17913	0.355549	-0.0785476	0.590686	0.100669	0.0131727	0.772558	0.481722	0.73975	0.357941	0.505137	0.551392	0.905606	-0.0408828	-0.204545	0.690027	0.623734	0.45896	0.613593	0.785747	0.488338	0.60105	0.178613	0.705494	0.118519	0.399994	0.251591	0.224878	-0.0291346	0.473832	0.493709
Capana11g001454	0.256689	-0.522532	-0.37163	0.293061	0.196181	0.770051	-0.216858	-0.410579	0.880601	0.12276	0.158105	0.355922	0.858639	0.248521	-0.505006	0.582675	-0.282741	0.560394	-0.058809	0.403152	-0.343809	0.799939	0.0664764	0.22776	0.82043	0.19839	0.481493	0.297506	0.468049	0.317489	0.642244	-0.0852858	-0.313968	0.739698	0.200426	0.321521	0.617681	0.755056	0.229671	0.344705	0.337059	0.866814	0.341147	0.490333	0.0601162	0.112018	0.258679	0.0329671	0.0455166
Capana08g001103	-0.0235863	-0.410065	-0.276439	0.373618	0.332787	0.407479	-0.0748133	-0.356336	0.532591	0.205207	0.163686	-0.0441577	0.304835	-0.0529203	-0.313137	0.480255	-0.43811	0.542617	0.00527619	0.20831	-0.131196	0.586823	-0.235479	0.073691	0.04225	0.302856	0.368357	-0.258448	0.721743	0.119599	0.382278	-0.183697	0.0546164	0.431799	0.0752433	0.427182	0.273955	0.4652	0.0487133	0.0332574	0.158289	0.0627331	0.0976023	-0.24697	0.314793	-0.490503	-0.050131	0.272771	0.2627
Capana04g000551	0.00662703	0.215626	0.0514365	-0.544854	-0.351174	-0.625115	-0.0943545	0.40183	-0.892645	-0.511742	-0.332749	-0.552186	-0.798556	-0.427727	0.705595	-0.849761	0.182526	-0.724028	-0.363552	-0.477049	0.181879	-0.676695	-0.0362664	-0.0636692	-0.635698	-0.457081	-0.758791	-0.254152	-0.614436	-0.530119	-0.764599	-0.073584	-0.0377088	-0.850376	-0.452093	-0.354691	-0.580435	-0.886663	-0.524696	-0.593097	-0.264517	-0.63211	-0.143989	-0.286909	-0.398907	0.120596	-0.031707	-0.418872	-0.425344
Capana00g001638	0.0454774	0.378654	-0.0420685	-0.324079	-0.0114743	-0.36017	0.195216	0.75243	-0.692899	-0.408273	-0.692931	-0.352766	-0.596827	-0.213226	0.710234	-0.600835	0.499953	-0.490208	-0.10804	-0.145539	0.45996	-0.68327	0.359071	-0.329161	-0.402896	-0.131219	-0.578046	0.0901896	-0.430785	-0.326527	-0.526097	0.3598	0.271616	-0.618009	-0.336794	-0.186822	-0.217801	-0.704866	-0.342942	-0.338223	-0.490672	-0.384755	-0.398592	-0.299127	-0.336685	0.167382	-0.361515	-0.427195	-0.437458
Capana05g000895	0.263925	-0.0647707	0.00510094	0.756188	0.56608	0.688658	0.244269	-0.30729	0.803277	0.566553	0.209337	0.220476	0.573064	0.0998231	-0.387817	0.791918	-0.286836	0.755761	0.391093	0.454598	0.11912	0.63915	-0.096504	-0.00504042	0.376266	0.69901	0.752873	-0.167227	0.891795	0.354841	0.717487	-0.0967767	0.247588	0.740807	0.420517	0.708341	0.659745	0.840617	0.376194	0.457461	0.148979	0.156754	0.0422446	-0.265696	0.492192	-0.289235	-0.149769	0.6371	0.631324
Capana02g001579	-0.297302	-0.213025	-0.00826992	-0.373538	-0.517754	-0.509284	-0.285859	-0.322728	-0.391003	-0.0925254	0.702956	-0.156797	-0.411119	-0.16149	-0.293815	-0.368979	-0.187679	-0.54096	-0.226015	-0.463099	-0.305813	-0.159815	-0.423009	0.258428	-0.463794	-0.30366	-0.26511	-0.33839	-0.438554	-0.237789	-0.39515	-0.491687	-0.313514	-0.339251	-0.113384	-0.425551	-0.510671	-0.291334	-0.151465	-0.247496	-0.147931	-0.38125	0.0147165	-0.00413055	-0.171501	-0.186781	0.277774	0.00541266	0.011543
Capana04g001165	-0.224903	0.19473	0.180128	0.470348	0.0925446	0.307752	0.12643	-0.573631	0.615569	0.602351	0.417176	0.676505	0.428847	0.625973	-0.487913	0.837612	-0.269102	0.440145	0.336164	0.556696	-0.0626918	0.34357	0.174827	-0.0405234	0.226932	0.568449	0.754504	0.214196	0.33761	0.636067	0.596567	-0.00352679	0.107815	0.703534	0.487811	0.130677	0.139012	0.708553	0.673063	0.677955	0.160651	0.431159	0.0110717	0.271327	0.656127	0.0419588	-0.0962399	0.465639	0.475968
Capana03g000117	-0.278174	-0.0114754	0.25295	0.0951164	-0.355165	-0.189635	-0.049084	-0.561564	0.11762	0.410162	0.794313	0.43217	0.0246369	0.290404	-0.525488	0.290126	-0.166321	-0.0932776	0.0947716	-0.029411	-0.243242	0.0356318	-0.153791	0.00257528	-0.0893366	0.124634	0.358401	0.0156512	-0.164621	0.331805	0.206191	-0.316618	-0.213069	0.195536	0.387678	-0.20881	-0.260817	0.253204	0.415854	0.359155	-0.100636	0.0622781	-0.0756441	0.343409	0.299764	-0.011412	0.0620598	0.391708	0.413069
Capana04g000406	-0.164654	0.293755	0.404942	0.611952	0.0123603	0.281845	0.322977	-0.556322	0.567027	0.775732	0.513106	0.649408	0.423151	0.626505	-0.411207	0.791859	-0.360184	0.532897	0.541674	0.62423	0.18578	0.343366	0.165436	-0.0272028	0.189427	0.69229	0.836143	0.038011	0.474869	0.667724	0.55778	0.0235572	0.340226	0.736137	0.562451	0.309383	0.144008	0.735767	0.758556	0.744002	0.215824	0.138846	-0.0365712	-0.0288255	0.833527	0.084114	-0.0888045	0.683436	0.677436
Capana00g004127	-0.110253	0.331703	0.649049	0.7586	-0.0628939	0.14885	0.591913	-0.342817	0.43465	0.958141	0.487617	0.71941	0.363036	0.563788	-0.315092	0.721184	-0.129346	0.598387	0.704374	0.524658	0.417554	0.155576	0.239598	-0.316875	0.190295	0.71208	0.889894	0.132358	0.458634	0.786759	0.635162	0.189719	0.455837	0.621954	0.792157	0.407712	0.116264	0.628654	0.875352	0.839588	-0.00278383	-0.0299359	-0.308023	-0.0576865	0.895318	0.162561	-0.305478	0.89319	0.888021
Capana04g002497	-0.219037	0.203964	0.476121	0.638391	-0.154047	0.204079	0.396884	-0.531054	0.544264	0.868617	0.584507	0.814129	0.458643	0.702773	-0.468048	0.79064	-0.249273	0.555111	0.566834	0.595985	0.209861	0.281778	0.266469	-0.183026	0.259916	0.654223	0.890537	0.231202	0.384825	0.821587	0.645908	0.120313	0.290216	0.726034	0.721876	0.264288	0.0785737	0.705915	0.886673	0.852272	0.0843438	0.223031	-0.183948	0.15866	0.862596	0.200038	-0.16762	0.737711	0.738057
Capana02g001847	-0.136581	0.0387787	0.207572	0.617818	-0.0402448	0.455274	0.345596	-0.396893	0.729712	0.715337	0.308236	0.883936	0.674946	0.792736	-0.464271	0.869385	-0.131088	0.665541	0.466016	0.766872	0.180863	0.406562	0.512036	-0.277476	0.52132	0.65665	0.879478	0.526412	0.441008	0.876909	0.772309	0.315202	0.237659	0.861173	0.65522	0.309403	0.300561	0.78617	0.858132	0.878593	0.00789559	0.611508	-0.215247	0.370643	0.739873	0.287587	-0.23753	0.489523	0.494347
Capana04g000218	0.14603	0.233356	0.53214	0.870167	0.175713	0.334389	0.566783	-0.294926	0.542635	0.92091	0.427234	0.526308	0.406644	0.29585	-0.291689	0.737983	-0.138253	0.674442	0.648218	0.433494	0.403578	0.283947	0.072105	-0.274554	0.260754	0.76598	0.896108	-0.0326756	0.642985	0.647348	0.727701	0.0372008	0.39048	0.625739	0.780541	0.620691	0.344897	0.708004	0.728935	0.743571	-0.0174815	-0.077668	-0.248888	-0.194373	0.771685	0.0287691	-0.31149	0.96216	0.959227
Capana11g000105	0.180199	0.0287169	0.00487078	0.685008	0.481646	0.670476	0.170726	-0.440289	0.793454	0.51955	0.19896	0.268083	0.51922	0.243176	-0.335201	0.837432	-0.390589	0.691253	0.3251	0.585231	0.0939467	0.614879	0.000480539	-0.0118507	0.270795	0.713939	0.745084	-0.152934	0.839041	0.389066	0.653815	-0.113069	0.256008	0.773803	0.338989	0.63171	0.533828	0.833259	0.402621	0.468004	0.174037	0.212572	0.0619936	-0.225206	0.593911	-0.243593	-0.148501	0.535764	0.531063
Capana08g002648	0.512102	-0.187498	-0.0738998	0.509536	0.571276	0.801507	-0.0691682	-0.421034	0.809517	0.238783	0.193141	-0.0995395	0.633036	-0.101347	-0.301344	0.560926	-0.48283	0.596326	0.1547	0.340955	-0.113084	0.802807	-0.335112	0.277282	0.436131	0.428752	0.504105	-0.449838	0.867242	-0.000190565	0.478885	-0.360424	0.0597291	0.685433	0.0695644	0.707705	0.729351	0.808908	0.0434702	0.162181	0.409565	0.13506	0.388332	-0.280701	0.247647	-0.350862	0.196727	0.376538	0.369382
Capana04g000259	-0.2801	0.0587924	0.0784914	-0.713166	-0.470848	-0.80932	-0.264655	0.207224	-0.86899	-0.457559	0.118115	-0.42978	-0.692013	-0.34885	0.227023	-0.859494	0.142604	-0.822356	-0.304195	-0.713245	-0.192494	-0.587139	-0.341648	0.245571	-0.559001	-0.672855	-0.750229	-0.265261	-0.801595	-0.547275	-0.807852	-0.203059	-0.233593	-0.817968	-0.412662	-0.676912	-0.672769	-0.813986	-0.467618	-0.569602	-0.0509978	-0.56255	0.0727434	-0.0415178	-0.512853	-0.0212988	0.293621	-0.369531	-0.371616
Capana06g001571	-0.195292	0.308905	0.610525	0.721574	-0.126044	0.0418848	0.598982	-0.277585	0.362336	0.967269	0.480476	0.819394	0.308063	0.574162	-0.339273	0.699254	0.00624882	0.530678	0.660582	0.429744	0.380212	0.0433795	0.291693	-0.377089	0.206141	0.663018	0.869539	0.308202	0.294446	0.855512	0.677786	0.23784	0.347556	0.531887	0.888672	0.271683	0.0366229	0.542032	0.920833	0.877118	-0.102121	0.0657632	-0.384096	0.122186	0.819486	0.252724	-0.362784	0.877305	0.880778
Capana01g000809	0.162878	-0.601688	-0.509128	0.248598	0.431592	0.647376	-0.30295	-0.377939	0.712468	-0.0255142	0.0685727	-0.117319	0.535811	-0.113177	-0.376672	0.454454	-0.465191	0.541584	-0.17034	0.202899	-0.358968	0.801037	-0.279294	0.271909	0.337299	0.154045	0.278223	-0.194992	0.71565	-0.0143928	0.405671	-0.258383	-0.172456	0.519822	-0.0836979	0.419806	0.497745	0.56533	-0.113237	-0.0603079	0.329087	0.376391	0.351351	-0.0382639	0.0564269	-0.437713	0.176928	0.0295041	0.0257874
Capana12g001526	0.23984	0.291132	-0.114397	-0.182262	0.361246	-0.0898363	0.217174	0.874011	-0.453775	-0.426552	-0.884486	-0.446424	-0.359839	-0.350936	0.649611	-0.465846	0.575885	-0.224782	-0.031714	-0.14424	0.404665	-0.483657	0.25606	-0.314026	-0.160348	-0.124669	-0.507262	0.077161	-0.151831	-0.388693	-0.349724	0.429366	0.300337	-0.4868	-0.34607	0.034589	0.131116	-0.528258	-0.427197	-0.366645	-0.357782	-0.259493	-0.275155	-0.339979	-0.426123	-0.00112724	-0.357609	-0.403124	-0.413702
Capana08g001380	0.152251	-0.190899	-0.596135	-0.00905436	0.59203	0.292157	-0.0236512	0.464083	0.0388118	-0.425149	-0.676232	-0.4847	-0.116608	-0.39417	0.182511	-0.032297	0.206132	0.180119	-0.167753	-0.0127385	0.071323	0.0598927	0.0369454	-0.0992892	-0.101818	-0.0346869	-0.279045	-0.0231969	0.334591	-0.336131	-0.0422043	0.199659	0.127913	-0.140741	-0.382836	0.254388	0.342496	-0.150546	-0.478492	-0.419631	-0.185897	0.0539817	-0.054607	-0.419421	-0.342956	-0.402008	-0.255158	-0.374951	-0.383225
Capana05g001982	0.217019	0.111027	-0.275013	-0.25601	0.347158	-0.082149	0.116284	0.794249	-0.462043	-0.552601	-0.752704	-0.621542	-0.43357	-0.500262	0.467883	-0.510892	0.507146	-0.211552	-0.0883313	-0.259657	0.27762	-0.406443	0.0821068	-0.168096	-0.262623	-0.282726	-0.607794	-0.0509299	-0.10536	-0.537391	-0.435381	0.308693	0.221942	-0.549006	-0.481811	0.0480611	0.124133	-0.56942	-0.595901	-0.548054	-0.322175	-0.293825	-0.17021	-0.507167	-0.554048	-0.177915	-0.226401	-0.477152	-0.488357
Capana05g002100	0.466105	-0.359561	-0.598157	0.0598802	0.610775	0.766627	-0.452668	-0.255372	0.640072	-0.333503	-0.184067	-0.336106	0.464642	-0.261456	-0.156802	0.290506	-0.366468	0.275517	-0.316736	0.162199	-0.413379	0.708458	-0.288678	0.439948	0.400293	0.0631505	0.0469185	-0.267605	0.524447	-0.31013	0.223982	-0.378423	-0.286622	0.396786	-0.341811	0.364076	0.644159	0.485723	-0.368771	-0.219771	0.401505	0.449371	0.564165	-0.0335298	-0.259712	-0.309366	0.322429	-0.248376	-0.244253
Capana05g001091	0.382777	0.0150393	-0.427755	-0.0252438	0.592804	0.310255	0.0853519	0.662763	-0.0655554	-0.459516	-0.836429	-0.524308	-0.120419	-0.415902	0.424481	-0.190754	0.352028	0.059803	-0.107018	0.0156321	0.262129	-0.0777383	0.15839	-0.179353	-0.0118241	-0.00586975	-0.352224	-0.0185933	0.23315	-0.401763	-0.129493	0.275219	0.221745	-0.20333	-0.402934	0.308543	0.431645	-0.215534	-0.496525	-0.390164	-0.254196	-0.0335247	-0.113571	-0.441796	-0.411335	-0.206125	-0.28561	-0.404343	-0.414339
Capana02g001705	0.44267	-0.26541	-0.520537	0.265927	0.792381	0.769446	-0.0705894	0.173589	0.60134	-0.176475	-0.449328	-0.238507	0.461114	-0.209089	-0.0895662	0.350341	0.0168666	0.448951	-0.0415245	0.260675	-0.0587745	0.530138	-0.0143624	0.0159577	0.414922	0.25776	0.134862	-0.0358998	0.652299	-0.1509	0.354086	0.0466877	0.0591906	0.400569	-0.173902	0.521531	0.801823	0.448104	-0.231275	-0.0746428	0.022577	0.379959	0.136716	-0.163808	-0.180602	-0.36755	-0.104238	-0.135065	-0.137013
Capana09g000081	0.367449	-0.370317	-0.533746	0.210583	0.605638	0.786118	-0.373539	-0.360846	0.76789	-0.124949	-0.0422573	-0.138248	0.562413	-0.132562	-0.314244	0.489032	-0.387951	0.41595	-0.205322	0.235413	-0.415121	0.771388	-0.265804	0.385257	0.457804	0.192957	0.254656	-0.181139	0.60603	-0.110427	0.411012	-0.349822	-0.2656	0.539984	-0.141699	0.392358	0.654144	0.63597	-0.168026	-0.0338282	0.396111	0.525674	0.505947	0.0498726	-0.0928294	-0.313231	0.258878	-0.0640107	-0.0570524
Capana08g000346	0.165335	0.322627	-0.0645467	-0.19127	0.392884	-0.19115	0.258999	0.918165	-0.524471	-0.390186	-0.804664	-0.470841	-0.442683	-0.388378	0.566511	-0.487502	0.654742	-0.275121	0.0359976	-0.239587	0.397468	-0.561338	0.17493	-0.352179	-0.264025	-0.13691	-0.52309	0.0273255	-0.182678	-0.421717	-0.38889	0.427691	0.344365	-0.546901	-0.329668	-0.0133305	0.097138	-0.56888	-0.431102	-0.384314	-0.44757	-0.374815	-0.345779	-0.396344	-0.442357	-0.133654	-0.404616	-0.343284	-0.353317
Capana12g000209	0.506523	-0.0417981	-0.452638	0.208135	0.321139	0.523881	-0.0246771	0.0789468	0.197732	-0.24377	-0.535901	-0.334147	-0.0313106	-0.277483	0.457812	0.10134	-0.172458	0.197148	-0.27724	0.305416	0.268188	0.199493	0.216177	-0.0432483	0.0175682	0.283884	-0.0301852	-0.119374	0.402837	-0.138446	0.123236	-0.101634	0.0262688	0.0645279	-0.198392	0.515684	0.329501	0.0662462	-0.271547	-0.173822	-0.0874403	0.102717	0.0190288	-0.403657	-0.0459362	0.0923826	-0.186035	-0.178085	-0.18231
Capana02g001025	0.150515	-0.570546	-0.541511	0.284461	0.478691	0.679501	-0.273946	-0.320283	0.764698	0.00947796	-0.0127396	0.0126793	0.603205	-0.0502702	-0.390245	0.532106	-0.359567	0.58064	-0.157867	0.226044	-0.37211	0.779502	-0.185656	0.24377	0.468419	0.18316	0.335289	-0.00688604	0.660382	0.0858537	0.522474	-0.170552	-0.226235	0.550999	0.0168407	0.374097	0.546883	0.599052	-0.0326655	0.0390573	0.330896	0.55349	0.344856	0.128659	0.0275641	-0.320622	0.13819	0.0253101	0.0279366
Capana06g002524	-0.169312	0.0999125	0.38681	0.585347	-0.120639	0.316346	0.264548	-0.62643	0.646095	0.767657	0.569123	0.761002	0.539394	0.710032	-0.48841	0.819285	-0.3432	0.560469	0.457851	0.652009	0.0995982	0.406766	0.24508	-0.173199	0.28533	0.619692	0.868499	0.187993	0.453598	0.766489	0.638384	0.0535416	0.231808	0.804131	0.605585	0.292416	0.130254	0.771879	0.812955	0.790901	0.107104	0.31538	-0.12261	0.216429	0.847891	0.115165	-0.126252	0.626188	0.628467
Capana01g001904	-0.393925	-0.167955	0.230049	-0.469476	-0.602206	-0.613562	-0.419495	-0.477891	-0.363878	-0.0639451	0.708914	-0.0449237	-0.240485	-0.0552896	-0.25232	-0.381636	-0.330743	-0.485136	-0.233203	-0.537391	-0.528489	-0.0934041	-0.557303	0.460686	-0.287916	-0.530068	-0.25233	-0.317156	-0.527855	-0.194302	-0.408557	-0.489097	-0.435215	-0.315628	-0.0965924	-0.596722	-0.645658	-0.271174	-0.0921385	-0.226276	0.355271	-0.286376	0.352648	0.285117	-0.107089	-0.0534688	0.560619	0.00402753	0.00944097
Capana02g000158	0.124377	0.284486	0.0119729	-0.264902	0.372469	-0.237416	0.212819	0.917188	-0.517425	-0.400427	-0.749641	-0.436053	-0.352157	-0.357669	0.478818	-0.527917	0.689911	-0.290522	0.0651671	-0.315457	0.282559	-0.541556	0.10141	-0.302895	-0.17167	-0.262142	-0.546532	0.0553708	-0.245542	-0.439596	-0.41384	0.45351	0.299887	-0.539129	-0.33868	-0.105872	0.0989324	-0.559297	-0.427297	-0.38518	-0.347044	-0.332359	-0.266961	-0.259162	-0.494794	-0.154539	-0.299984	-0.366417	-0.375254
Capana03g004588	0.317754	-0.112433	-0.492242	0.131452	0.62828	0.635035	-0.301817	-0.18357	0.585404	-0.16526	-0.166817	-0.0760534	0.381437	-0.113037	-0.239265	0.431636	-0.123271	0.235404	-0.173631	0.15532	-0.369983	0.484099	-0.156314	0.319571	0.395266	0.158023	0.167543	-0.00730511	0.329281	-0.111006	0.353361	-0.248723	-0.282542	0.36634	-0.106184	0.204407	0.573387	0.475348	-0.15214	-0.00194781	0.276141	0.566762	0.431944	0.14321	-0.217168	-0.17237	0.170777	-0.133745	-0.116779
Capana06g001111	-0.125402	0.249602	0.139086	-0.638684	-0.266684	-0.727624	-0.162594	0.412161	-0.895235	-0.516497	-0.295761	-0.521663	-0.715608	-0.419496	0.562865	-0.861851	0.232111	-0.714936	-0.286535	-0.637972	-0.0259732	-0.670067	-0.221052	0.125166	-0.533036	-0.642841	-0.790778	-0.236395	-0.703956	-0.578772	-0.794335	-0.0393547	-0.101017	-0.876518	-0.461198	-0.536262	-0.59186	-0.883706	-0.536244	-0.616524	0.0210339	-0.581775	0.0802527	-0.145037	-0.493304	0.0552149	0.162974	-0.425205	-0.431106
Capana10g001609	-0.362764	-0.114144	0.0743118	-0.438932	-0.490997	-0.641254	-0.281773	-0.239805	-0.501193	-0.103265	0.648241	-0.158082	-0.486907	-0.17344	-0.234122	-0.435993	-0.0932425	-0.638422	-0.219211	-0.561218	-0.329041	-0.28649	-0.454047	0.221218	-0.520576	-0.3596	-0.327167	-0.325535	-0.55423	-0.270102	-0.457894	-0.454747	-0.309431	-0.441058	-0.116342	-0.544698	-0.588774	-0.386184	-0.163366	-0.270932	-0.157904	-0.443572	-0.00531663	0.0620062	-0.207626	-0.208361	0.246218	-0.00620684	0.00188515
Capana07g000068	-0.0804059	0.0210737	0.13149	0.756662	0.114481	0.370276	0.350594	-0.403047	0.658825	0.799005	0.35758	0.746157	0.461114	0.443926	-0.439853	0.893837	-0.126231	0.670219	0.38247	0.47007	0.136446	0.345733	0.233665	-0.211409	0.379116	0.695319	0.901067	0.366578	0.469165	0.809198	0.889257	0.0691977	0.0636477	0.663599	0.815635	0.36428	0.258117	0.711721	0.774017	0.78689	-0.0132036	0.441867	-0.185349	0.242217	0.653555	0.180303	-0.297703	0.722795	0.736741
Capana10g001362	-0.111963	0.0273461	0.297358	0.767816	0.191783	0.371357	0.4194	-0.364629	0.667528	0.830309	0.382035	0.618454	0.526052	0.467243	-0.452135	0.847572	-0.207487	0.754282	0.551845	0.533104	0.216962	0.425521	0.141372	-0.248404	0.292573	0.709768	0.892853	0.128631	0.686149	0.716117	0.757769	0.149916	0.349851	0.745775	0.681064	0.483682	0.313883	0.760497	0.735712	0.722987	0.0385639	0.17242	-0.213201	-0.0152274	0.788634	-0.0951473	-0.29838	0.771954	0.767342
Capana06g000284	-0.346572	-0.172628	-0.0768605	-0.492804	-0.445064	-0.563109	-0.355606	-0.250593	-0.464252	-0.217188	0.617407	-0.238406	-0.480039	-0.206176	-0.280471	-0.440416	-0.129328	-0.635932	-0.272575	-0.539889	-0.382939	-0.220637	-0.467951	0.324665	-0.513644	-0.398793	-0.387119	-0.345351	-0.527443	-0.350732	-0.498393	-0.48126	-0.339417	-0.429013	-0.231415	-0.538788	-0.532363	-0.378047	-0.259476	-0.351323	-0.114325	-0.37704	0.0793023	0.0014605	-0.295608	-0.246899	0.319246	-0.121069	-0.114372
Capana08g002488	-0.266748	-0.225995	0.0930336	-0.335988	-0.478801	-0.455301	-0.312566	-0.406179	-0.280432	-0.0501799	0.712211	-0.0677783	-0.312401	-0.0934737	-0.343955	-0.247623	-0.153642	-0.480948	-0.230718	-0.428487	-0.398193	-0.124575	-0.414674	0.0901548	-0.414472	-0.324506	-0.177742	-0.274574	-0.396576	-0.160502	-0.28712	-0.482293	-0.354305	-0.250022	-0.0613528	-0.401763	-0.483954	-0.19914	-0.0876238	-0.181132	-0.193376	-0.261943	-0.0256249	0.184932	-0.0939221	-0.251997	0.20203	0.0247182	0.0413291
Capana08g000070	0.0387675	0.376642	0.0176954	-0.168909	0.369998	-0.239642	0.333088	0.938304	-0.502934	-0.281366	-0.749467	-0.304428	-0.388367	-0.217614	0.475296	-0.413477	0.735112	-0.272316	0.143747	-0.169121	0.422252	-0.602032	0.269373	-0.45785	-0.241562	-0.0623817	-0.435758	0.146553	-0.21887	-0.294096	-0.340403	0.546269	0.426228	-0.467428	-0.239357	-0.0854915	0.0824184	-0.515191	-0.281475	-0.244209	-0.536395	-0.330204	-0.464875	-0.284702	-0.34941	-0.13775	-0.490976	-0.29317	-0.302576
Capana05g002211	-0.181654	0.275057	0.437855	0.52021	-0.0323932	0.171799	0.26271	-0.581638	0.469704	0.738527	0.657382	0.561323	0.332342	0.536009	-0.477686	0.680979	-0.355622	0.388378	0.515266	0.471048	0.105712	0.294594	0.0121858	0.0285877	0.0908272	0.604858	0.751771	-0.0884027	0.380654	0.552123	0.446831	-0.0992075	0.283727	0.640012	0.513259	0.225844	0.0795868	0.669736	0.683148	0.65963	0.176197	0.0074689	-0.0224919	-0.0524824	0.747621	-0.0179563	-0.0218411	0.691579	0.687461
Capana06g000398	-0.144945	-0.155242	-0.0839142	-0.705153	-0.581632	-0.638991	-0.490405	-0.147694	-0.713382	-0.523579	0.294741	-0.513304	-0.662768	-0.407214	0.207566	-0.785821	-0.190638	-0.830157	-0.560813	-0.634577	-0.327881	-0.353926	-0.428587	0.323378	-0.612228	-0.630433	-0.706915	-0.448019	-0.675413	-0.582814	-0.764703	-0.53734	-0.43445	-0.708733	-0.488431	-0.552513	-0.69376	-0.690844	-0.54104	-0.638528	-0.0422083	-0.500886	0.167008	-0.0379122	-0.447166	-0.0584304	0.383135	-0.395337	-0.391569
Capana02g001716	-0.126731	0.389721	0.631221	0.782422	-0.0355941	0.183508	0.669813	-0.253398	0.448039	0.970377	0.407682	0.79293	0.375845	0.659988	-0.308596	0.766235	-0.024394	0.60687	0.758468	0.6299	0.506269	0.105783	0.395556	-0.436119	0.206922	0.791675	0.917121	0.253655	0.452327	0.853018	0.664718	0.318035	0.542764	0.665041	0.810143	0.414989	0.163114	0.642631	0.935036	0.913111	-0.136084	0.0375015	-0.431755	-0.0391245	0.919463	0.195606	-0.423369	0.857016	0.852325
Capana12g001437	-0.333191	0.202267	0.298002	-0.590429	-0.61493	-0.821279	-0.203583	0.00343495	-0.800776	-0.262409	0.173676	-0.222467	-0.62017	-0.147504	0.309288	-0.708316	-0.0322579	-0.690629	-0.228916	-0.543763	-0.128225	-0.558886	-0.245936	0.2501	-0.517114	-0.576319	-0.561505	-0.220298	-0.760543	-0.32492	-0.700137	-0.185565	-0.191528	-0.694988	-0.254477	-0.644458	-0.798851	-0.7149	-0.246061	-0.381615	0.161996	-0.523957	0.141258	0.0310082	-0.222383	0.192993	0.323552	-0.217066	-0.221011
Capana00g003379	-0.0444489	0.0446578	0.31169	0.776091	0.053387	0.449129	0.415421	-0.455628	0.742383	0.861948	0.468957	0.777328	0.619794	0.604561	-0.507678	0.904118	-0.201258	0.730862	0.547665	0.644961	0.21915	0.446857	0.280649	-0.248016	0.434268	0.744785	0.96843	0.27645	0.594038	0.828978	0.831452	0.14072	0.267125	0.842773	0.759078	0.468414	0.343079	0.845626	0.849751	0.86429	0.0117524	0.363191	-0.212895	0.153027	0.800882	0.126367	-0.250949	0.753459	0.756484
Capana10g002124	0.434419	-0.208559	-0.551791	0.0952041	0.77769	0.676655	-0.249222	0.0405359	0.474747	-0.360367	-0.39285	-0.471345	0.267798	-0.3611	-0.0658945	0.230799	-0.123773	0.299152	-0.163934	0.118508	-0.212579	0.495094	-0.234953	0.236974	0.202184	0.0677708	-0.0465214	-0.280901	0.570997	-0.38767	0.132456	-0.168819	-0.0363844	0.242248	-0.39756	0.428708	0.659707	0.32231	-0.449253	-0.310036	0.199233	0.24353	0.363225	-0.318525	-0.28732	-0.477688	0.092754	-0.25463	-0.256451
Capana02g002452	0.0219867	0.296474	0.610415	0.841357	0.0780994	0.228947	0.641997	-0.250634	0.455506	0.953638	0.423396	0.587663	0.35375	0.406565	-0.269828	0.705849	-0.102987	0.6547	0.720345	0.484111	0.488352	0.1908	0.171817	-0.347921	0.184294	0.76668	0.883641	0.0231484	0.59161	0.705911	0.661572	0.160118	0.504907	0.60367	0.781974	0.560077	0.241951	0.641497	0.793387	0.77834	-0.0653266	-0.135149	-0.343677	-0.220253	0.851516	0.0572387	-0.366958	0.950984	0.942932
Capana07g001653	0.136455	-0.445356	-0.157715	-0.559356	-0.362939	-0.134778	-0.663813	-0.441492	-0.141377	-0.467755	0.540308	-0.43644	-0.0689402	-0.357652	-0.225964	-0.483139	-0.380305	-0.51494	-0.49764	-0.494393	-0.63873	0.206368	-0.632507	0.573608	-0.0844705	-0.60758	-0.441788	-0.501535	-0.332154	-0.563393	-0.460038	-0.711426	-0.600406	-0.230738	-0.457935	-0.304655	-0.197457	-0.150894	-0.495615	-0.501268	0.278246	-0.111912	0.516636	0.163875	-0.479777	-0.178988	0.703717	-0.323404	-0.313406
Capana12g002655	-0.0106435	-0.363286	-0.666481	0.0622275	0.603782	0.533299	-0.315448	-0.132328	0.5382	-0.23897	-0.245751	-0.153666	0.315306	-0.0624775	-0.294443	0.414823	-0.19705	0.358865	-0.204949	0.196125	-0.370793	0.532448	-0.121273	0.204867	0.169551	0.090086	0.0827713	-0.00920776	0.493572	-0.106892	0.25446	-0.0596361	-0.112992	0.348144	-0.260785	0.174945	0.429154	0.361845	-0.223307	-0.157956	0.197232	0.477903	0.287439	-0.0127504	-0.11431	-0.478731	0.0384748	-0.258402	-0.257076
Capana00g002532	-0.117779	-0.0466563	0.0782451	-0.660283	-0.657026	-0.669173	-0.419071	-0.156627	-0.740494	-0.461379	0.234868	-0.449557	-0.643603	-0.357571	0.325286	-0.784698	-0.210031	-0.755331	-0.498236	-0.596152	-0.253511	-0.397921	-0.370791	0.32573	-0.557361	-0.661612	-0.669942	-0.402996	-0.689682	-0.507016	-0.747642	-0.467973	-0.399556	-0.719172	-0.423283	-0.525835	-0.751405	-0.712851	-0.470358	-0.58167	0.111488	-0.503772	0.228596	-0.02627	-0.358471	0.115413	0.421402	-0.345514	-0.343818
Capana03g000145	0.0210278	0.183157	0.0674759	-0.612542	-0.381838	-0.637359	-0.195801	0.334203	-0.880935	-0.553864	-0.298473	-0.566668	-0.736485	-0.456867	0.693895	-0.896683	0.11039	-0.740657	-0.413168	-0.554505	0.0563281	-0.619237	-0.142239	0.105356	-0.542453	-0.573991	-0.795084	-0.28298	-0.67005	-0.57899	-0.790705	-0.146624	-0.153652	-0.864125	-0.47973	-0.422296	-0.597114	-0.882944	-0.564327	-0.632307	-0.0518791	-0.585412	0.0456788	-0.193612	-0.465653	0.17976	0.149838	-0.448462	-0.454324
Capana04g000307	0.080716	-0.0497139	-0.0714458	0.759363	0.337135	0.673557	0.378438	-0.174006	0.815856	0.606408	-0.0243292	0.651284	0.653316	0.483447	-0.332377	0.916655	-0.0369445	0.82972	0.38579	0.711649	0.248673	0.478904	0.465029	-0.306442	0.563327	0.734109	0.839247	0.484561	0.676578	0.746414	0.899159	0.322425	0.231296	0.804192	0.611839	0.552564	0.560728	0.78231	0.655638	0.728763	-0.053887	0.632757	-0.213514	0.159112	0.571847	0.151383	-0.381146	0.464469	0.469375
Capana08g000980	-0.27166	-0.243607	0.0366446	-0.595066	-0.579671	-0.599275	-0.453187	-0.311234	-0.504294	-0.304104	0.591705	-0.273685	-0.45412	-0.214823	-0.162527	-0.549451	-0.170016	-0.696722	-0.39302	-0.578876	-0.455441	-0.225978	-0.475942	0.227464	-0.506284	-0.563264	-0.468988	-0.362989	-0.585856	-0.39056	-0.570614	-0.514831	-0.422774	-0.474148	-0.304839	-0.559528	-0.621971	-0.446246	-0.317241	-0.424665	-0.0980774	-0.372042	0.0933309	0.154134	-0.294151	-0.212948	0.353937	-0.215238	-0.204287
Capana06g000891	0.138031	0.367646	0.24431	-0.219521	-0.286003	-0.486513	0.195133	0.412242	-0.768412	-0.228159	-0.297448	-0.445654	-0.712946	-0.372499	0.717574	-0.659151	0.17397	-0.461989	-0.0861746	-0.288763	0.471472	-0.633877	0.0609984	-0.159612	-0.560055	-0.183895	-0.498573	-0.279597	-0.365773	-0.346035	-0.567892	0.0136204	0.198013	-0.686486	-0.222683	-0.0522492	-0.427271	-0.706495	-0.317873	-0.37186	-0.271237	-0.731557	-0.245433	-0.530022	-0.153016	0.207277	-0.15489	-0.110007	-0.123808
Capana06g001506	-0.292504	-0.107052	0.0421328	-0.664909	-0.437487	-0.731019	-0.378443	-0.025249	-0.690405	-0.381799	0.393241	-0.379212	-0.60075	-0.338103	-0.0440054	-0.695257	0.0587564	-0.808086	-0.351734	-0.734086	-0.39042	-0.429084	-0.493074	0.193827	-0.574158	-0.623369	-0.619008	-0.342674	-0.707572	-0.512295	-0.679612	-0.398062	-0.355699	-0.672147	-0.353306	-0.652796	-0.622062	-0.627561	-0.42098	-0.520001	-0.168766	-0.492422	0.0383121	0.0858401	-0.458311	-0.254576	0.27516	-0.270773	-0.261459
Capana02g002479	-0.256782	-0.205048	0.0550744	-0.563314	-0.5808	-0.58819	-0.407185	-0.290683	-0.507835	-0.281778	0.567687	-0.25288	-0.471924	-0.189399	-0.13285	-0.528669	-0.142554	-0.691563	-0.371783	-0.532131	-0.39359	-0.256412	-0.413852	0.154947	-0.527662	-0.512934	-0.44698	-0.34016	-0.57458	-0.358775	-0.555233	-0.48335	-0.378883	-0.463955	-0.284481	-0.528019	-0.617329	-0.444259	-0.288085	-0.392687	-0.170516	-0.3791	0.0242482	0.133251	-0.256541	-0.196203	0.28525	-0.202088	-0.190726
Capana08g000387	-0.00938557	0.403627	0.0150631	-0.326356	0.0404503	-0.443735	0.260662	0.821317	-0.752693	-0.381829	-0.603963	-0.396181	-0.655506	-0.281629	0.564301	-0.623695	0.614424	-0.485466	0.0166713	-0.272626	0.43961	-0.749341	0.242763	-0.306968	-0.456777	-0.207703	-0.601964	0.0516109	-0.450262	-0.380824	-0.562517	0.385821	0.316455	-0.685332	-0.323107	-0.215777	-0.206578	-0.741528	-0.367651	-0.371259	-0.507059	-0.478342	-0.403647	-0.397069	-0.403353	0.0404388	-0.342798	-0.366875	-0.377117
Capana01g000175	-0.284235	-0.211459	-0.0635686	-0.584669	-0.480865	-0.60047	-0.372786	-0.135696	-0.555693	-0.329678	0.501923	-0.312468	-0.521159	-0.256167	-0.160752	-0.577002	-0.0325621	-0.726426	-0.348667	-0.587599	-0.361358	-0.300477	-0.416689	0.184304	-0.54019	-0.496519	-0.510699	-0.319528	-0.595409	-0.423928	-0.586744	-0.428135	-0.343602	-0.523021	-0.316636	-0.555898	-0.553243	-0.495363	-0.349101	-0.438817	-0.247802	-0.404604	-0.0166113	0.0535384	-0.376564	-0.25418	0.250223	-0.24048	-0.231893
Capana06g002562	-0.341674	-0.176739	-0.105881	-0.547776	-0.430379	-0.588	-0.360951	-0.168358	-0.515974	-0.289473	0.546068	-0.276531	-0.516675	-0.241301	-0.259033	-0.497225	-0.0438481	-0.674199	-0.294599	-0.585639	-0.391687	-0.277427	-0.450795	0.292915	-0.522794	-0.470065	-0.461273	-0.302339	-0.58236	-0.396696	-0.540818	-0.435528	-0.352004	-0.494842	-0.277547	-0.575131	-0.533224	-0.448524	-0.316694	-0.40427	-0.158267	-0.359174	0.0603488	0.0185926	-0.37837	-0.252724	0.302168	-0.198337	-0.189789
Capana09g001251	-0.20586	-0.205016	0.0272678	-0.490682	-0.422246	-0.495182	-0.378039	-0.240191	-0.407826	-0.257204	0.510124	-0.218457	-0.406057	-0.201243	-0.199487	-0.416593	-0.0302891	-0.621178	-0.338822	-0.521925	-0.421705	-0.234565	-0.403398	0.0541287	-0.458815	-0.467639	-0.381447	-0.266965	-0.511501	-0.327377	-0.434393	-0.442284	-0.385084	-0.405702	-0.231293	-0.474995	-0.488727	-0.363539	-0.26788	-0.345172	-0.254033	-0.273967	-0.0253893	0.199839	-0.280309	-0.273292	0.188432	-0.179148	-0.160602
Capana02g002478	-0.157499	-0.188226	0.121676	-0.464991	-0.445091	-0.455067	-0.347628	-0.246406	-0.374398	-0.235135	0.467005	-0.190667	-0.343376	-0.136994	-0.131257	-0.403209	-0.0451765	-0.580835	-0.315651	-0.434194	-0.368079	-0.216279	-0.332891	-0.0529063	-0.43133	-0.445003	-0.349228	-0.260728	-0.456349	-0.287694	-0.424566	-0.388006	-0.31681	-0.346028	-0.234767	-0.410516	-0.472347	-0.330123	-0.229828	-0.308056	-0.273425	-0.276977	-0.0754905	0.22301	-0.191856	-0.257178	0.13978	-0.178596	-0.161679
Capana03g000560	0.339679	-0.591355	-0.584265	0.138981	0.480844	0.780989	-0.446727	-0.398313	0.776465	-0.18788	0.0152835	-0.18155	0.634232	-0.148378	-0.360137	0.399251	-0.472936	0.448874	-0.269801	0.2026	-0.478345	0.873007	-0.30505	0.427209	0.499734	0.0667174	0.194523	-0.199415	0.637176	-0.141589	0.359968	-0.350311	-0.309821	0.545699	-0.209758	0.392036	0.625795	0.610638	-0.224698	-0.113925	0.44841	0.531418	0.541428	0.0746708	-0.122443	-0.342609	0.354044	-0.132405	-0.130639
Capana05g001459	-0.438654	0.153977	0.550281	0.142554	-0.646206	-0.409969	0.189899	-0.473674	-0.0625693	0.597937	0.77023	0.632582	-0.0186977	0.499961	-0.352604	0.2075	-0.141441	-0.037321	0.287664	0.0654344	0.0267075	-0.147679	0.0689582	-0.089852	-0.101005	0.144279	0.409876	0.162393	-0.265667	0.54835	0.157193	-0.0550964	-0.00550913	0.145059	0.54695	-0.259414	-0.483215	0.125304	0.640846	0.51959	-0.0274777	-0.0718041	-0.195002	0.316874	0.526672	0.29122	0.0160343	0.5095	0.517675
Capana01g003977	-0.25302	0.326763	0.442816	0.701536	-0.029333	0.229506	0.567132	-0.272376	0.525182	0.887565	0.317885	0.910751	0.450666	0.798751	-0.369039	0.845675	-0.011344	0.608125	0.661997	0.714686	0.389154	0.149887	0.521623	-0.399693	0.295525	0.771277	0.911277	0.464742	0.380759	0.925403	0.71387	0.400047	0.449323	0.729332	0.775552	0.278203	0.157733	0.668239	0.961595	0.946166	-0.103682	0.313744	-0.388334	0.175517	0.873285	0.262769	-0.408758	0.687932	0.687776
Capana01g003985	-0.254286	-0.0178776	0.262893	-0.535549	-0.617822	-0.601088	-0.424707	-0.372924	-0.478346	-0.223138	0.377696	-0.153095	-0.322501	-0.104362	0.111988	-0.507739	-0.334041	-0.509668	-0.330859	-0.484115	-0.41613	-0.198644	-0.423186	0.452888	-0.292245	-0.619856	-0.395163	-0.293374	-0.584046	-0.269282	-0.519766	-0.411157	-0.414875	-0.442138	-0.226856	-0.562747	-0.701047	-0.43047	-0.207934	-0.333639	0.485961	-0.28526	0.441293	0.235146	-0.142713	0.164544	0.574385	-0.16684	-0.16455
Capana01g003987	-0.339399	-0.149687	0.104276	-0.611348	-0.695508	-0.683562	-0.480732	-0.385288	-0.552496	-0.266739	0.547407	-0.196706	-0.437769	-0.173798	-0.0372831	-0.578048	-0.310577	-0.646985	-0.403723	-0.59974	-0.476856	-0.228242	-0.4909	0.492752	-0.403903	-0.63896	-0.463331	-0.318709	-0.680665	-0.327762	-0.576512	-0.515567	-0.505112	-0.521677	-0.244469	-0.657677	-0.758234	-0.495019	-0.262039	-0.395358	0.30505	-0.32765	0.360085	0.212334	-0.258539	0.0746024	0.574352	-0.188793	-0.183414
Capana02g002032	0.356748	0.23853	-0.324021	-0.0431012	0.328993	0.123761	0.0593134	0.500547	-0.266505	-0.405235	-0.836582	-0.455391	-0.385996	-0.367623	0.763514	-0.25134	0.184772	-0.150467	-0.281206	0.053062	0.379704	-0.276233	0.274767	-0.205515	-0.23552	0.102993	-0.359201	-0.0533324	0.0244435	-0.311011	-0.195599	0.111013	0.134448	-0.350765	-0.322915	0.207135	0.0903884	-0.372396	-0.411782	-0.343149	-0.276071	-0.155597	-0.160207	-0.401807	-0.24373	0.100492	-0.347435	-0.351457	-0.357181
Capana06g000650	0.340593	-0.60334	-0.685264	0.023599	0.499876	0.710711	-0.467472	-0.232111	0.61919	-0.360484	-0.174777	-0.346379	0.483173	-0.264302	-0.201342	0.232704	-0.39654	0.350406	-0.366242	0.129518	-0.430682	0.760279	-0.275079	0.381943	0.376283	-0.0299259	0.00271626	-0.217548	0.575409	-0.280567	0.20845	-0.294173	-0.284641	0.37424	-0.363927	0.354581	0.57053	0.416602	-0.392775	-0.2884	0.358778	0.444975	0.488426	-0.0249098	-0.249106	-0.382552	0.296104	-0.296101	-0.297823
Capana08g002478	-0.353363	0.0927571	0.128511	0.289209	-0.216518	0.217849	0.245174	-0.256935	0.475738	0.475789	0.192336	0.903228	0.508819	0.897584	-0.423139	0.649913	0.0471793	0.388726	0.354942	0.681424	0.0906533	0.16185	0.651955	-0.272003	0.424137	0.400862	0.610902	0.741191	0.0595679	0.800332	0.520194	0.467813	0.167435	0.649411	0.474721	-0.0543282	0.0772953	0.50726	0.766803	0.764328	-0.0559127	0.716993	-0.234951	0.566369	0.540122	0.401365	-0.191607	0.153163	0.161767
Capana00g001997	-0.497822	-0.0232317	0.271075	-0.286818	-0.749689	-0.599234	-0.159997	-0.475063	-0.342293	0.163888	0.798678	0.228045	-0.283504	0.221129	-0.311119	-0.201348	-0.255978	-0.421065	-0.0438658	-0.248443	-0.230767	-0.19653	-0.208464	0.239578	-0.34726	-0.218921	-0.0421698	-0.107355	-0.515274	0.102252	-0.279254	-0.313867	-0.225704	-0.178158	0.114829	-0.526317	-0.674495	-0.190228	0.202966	0.06322	0.0533143	-0.244085	0.0302916	0.208166	0.140868	0.124213	0.3084	0.143844	0.147894
Capana00g004126	-0.116001	0.358134	0.64038	0.739769	-0.035896	0.182863	0.566282	-0.37244	0.46065	0.930513	0.475192	0.698191	0.378156	0.599701	-0.313886	0.738924	-0.175221	0.597229	0.706834	0.58297	0.409847	0.187308	0.246089	-0.29443	0.170669	0.728979	0.88534	0.0923333	0.493045	0.76259	0.602369	0.186665	0.496395	0.663018	0.728627	0.415688	0.130864	0.65804	0.859407	0.826657	0.0277408	-0.0315973	-0.279377	-0.0939188	0.921246	0.123748	-0.287815	0.854958	0.847216
Capana04g002496	-0.181277	0.167506	0.453064	0.631549	-0.152553	0.220545	0.346913	-0.570809	0.563889	0.85134	0.602181	0.800083	0.471045	0.658334	-0.473272	0.789885	-0.273306	0.547084	0.514554	0.553353	0.151958	0.310047	0.217666	-0.14405	0.289291	0.623803	0.886403	0.219027	0.372767	0.803507	0.667293	0.0552267	0.20842	0.716363	0.72833	0.26067	0.0839274	0.714501	0.862361	0.833722	0.120535	0.256171	-0.131092	0.206388	0.825693	0.21319	-0.125909	0.736938	0.740739
Capana04g002498	-0.200662	0.25481	0.468145	0.659609	-0.109987	0.225805	0.412913	-0.508625	0.551073	0.869363	0.524318	0.820853	0.448042	0.708049	-0.424438	0.81723	-0.230287	0.560555	0.566386	0.624959	0.236596	0.263152	0.30212	-0.205994	0.259182	0.692725	0.901623	0.250928	0.391188	0.832522	0.665843	0.137063	0.304684	0.729048	0.728562	0.278074	0.0952706	0.710153	0.893229	0.867156	0.0723415	0.241131	-0.194935	0.155241	0.871563	0.219769	-0.206034	0.733903	0.735173
Capana02g000614	-0.302183	0.0210322	0.43772	0.105969	-0.553373	-0.398614	0.0942562	-0.475077	-0.116424	0.49132	0.866067	0.338473	-0.131297	0.194712	-0.373836	0.068777	-0.210737	-0.1335	0.186111	-0.136866	-0.0355623	-0.090108	-0.205055	0.0225824	-0.229258	0.0943016	0.285045	-0.143143	-0.193729	0.293663	0.0503731	-0.301739	-0.0763497	0.0279832	0.421231	-0.173371	-0.424463	0.0749185	0.409862	0.301416	-0.0840368	-0.301887	-0.145178	0.088125	0.363125	0.0558232	0.0830359	0.530117	0.536373
Capana02g001947	0.039874	0.418249	0.700272	0.750488	0.0750399	0.183576	0.631322	-0.232903	0.361115	0.876372	0.40939	0.467412	0.274167	0.408303	-0.189774	0.600632	-0.133936	0.543448	0.74844	0.506682	0.533803	0.13267	0.147455	-0.33555	0.0562147	0.739969	0.784634	-0.132498	0.573718	0.577487	0.477532	0.145485	0.62529	0.562624	0.623896	0.548965	0.205589	0.583816	0.711152	0.693456	-0.0631478	-0.303741	-0.33452	-0.367844	0.860888	-0.0202683	-0.337405	0.882804	0.867907
Capana03g002644	0.33876	-0.318635	-0.374585	0.428868	0.78207	0.781028	-0.0226626	-0.0183986	0.771341	0.0821465	-0.189848	-0.0579217	0.631881	-0.10359	-0.322982	0.550874	-0.099329	0.640106	0.113442	0.280031	-0.133958	0.681887	-0.136372	0.0738384	0.514556	0.340741	0.376113	-0.057294	0.789977	0.025699	0.540767	0.00673043	0.0662846	0.582646	0.0376602	0.563989	0.819203	0.658131	-0.0264213	0.103392	0.179115	0.396959	0.197195	-0.0969084	0.0147212	-0.429584	-0.0423394	0.130515	0.127894
Capana03g004551	-0.491684	0.266916	0.249932	0.153805	-0.331871	0.0154343	0.291112	-0.187202	0.252045	0.42315	0.174998	0.85653	0.311776	0.975821	-0.318591	0.503719	0.0873218	0.2111	0.40167	0.691516	0.192093	-0.0414368	0.720492	-0.343253	0.185558	0.360291	0.480465	0.683237	-0.0795473	0.738684	0.28452	0.548833	0.329583	0.523166	0.351465	-0.183509	-0.113994	0.332359	0.743218	0.70384	-0.150418	0.512471	-0.343916	0.445943	0.587615	0.372349	-0.245911	0.0708105	0.0722272
Capana08g001640	-0.289854	0.261087	0.238902	0.580999	0.0194603	0.234385	0.473297	-0.156389	0.512092	0.733543	0.159161	0.950147	0.446394	0.797317	-0.382275	0.823913	0.160723	0.521534	0.522142	0.656285	0.269222	0.0881329	0.615199	-0.430999	0.376998	0.670279	0.810061	0.699609	0.214903	0.912479	0.736563	0.475	0.28814	0.658772	0.735781	0.121256	0.176741	0.58901	0.897992	0.907564	-0.194136	0.567224	-0.399775	0.418881	0.670443	0.325161	-0.443218	0.482264	0.493529
Capana08g002086	-0.0858382	0.363979	0.6283	0.793664	0.0269835	0.211601	0.634862	-0.28652	0.468269	0.95467	0.419852	0.698499	0.374117	0.583359	-0.297921	0.758873	-0.0962746	0.623837	0.741351	0.601843	0.481414	0.162956	0.294473	-0.395471	0.169564	0.792167	0.906107	0.122499	0.535638	0.780903	0.642854	0.243101	0.552857	0.668417	0.760548	0.472387	0.189903	0.663433	0.871789	0.849338	-0.0898062	-0.0451846	-0.382734	-0.12782	0.923973	0.0913474	-0.395539	0.880618	0.87309
Capana01g001636	0.223113	0.265642	-0.11495	-0.132905	0.22788	-0.103481	0.304295	0.823126	-0.485701	-0.393077	-0.766605	-0.438472	-0.448841	-0.343797	0.554589	-0.440019	0.5803	-0.166661	0.0334813	-0.108581	0.490622	-0.521534	0.309489	-0.353277	-0.253446	-0.138282	-0.482849	0.09592	-0.133085	-0.338645	-0.350936	0.442073	0.340909	-0.505078	-0.312916	0.104132	0.0785678	-0.556887	-0.397988	-0.355502	-0.449237	-0.285795	-0.34997	-0.491568	-0.381319	0.0290308	-0.380762	-0.366353	-0.376644
Capana03g000138	-0.168447	0.0213099	0.163323	-0.63139	-0.568547	-0.665168	-0.413493	-0.15606	-0.677227	-0.400769	0.180136	-0.38304	-0.521997	-0.30658	0.317259	-0.72448	-0.236072	-0.645503	-0.413446	-0.599091	-0.311741	-0.343581	-0.426338	0.453603	-0.421979	-0.689908	-0.612355	-0.37379	-0.657636	-0.466342	-0.694802	-0.401169	-0.384527	-0.663467	-0.378629	-0.56063	-0.717974	-0.648348	-0.415407	-0.530269	0.386121	-0.447888	0.400526	0.0411346	-0.324557	0.155103	0.531655	-0.296987	-0.299207
Capana08g000393	0.486322	-0.26314	-0.546896	-0.144966	0.383881	0.353962	-0.160132	0.45215	-0.0263652	-0.575999	-0.691028	-0.597015	-0.0447744	-0.49861	0.44868	-0.318664	0.110166	-0.042351	-0.378221	-0.0544965	0.0901556	0.0983221	0.0469959	-0.0237773	0.0651768	-0.12126	-0.427999	-0.122874	0.188266	-0.48291	-0.174539	0.0184162	-0.0431746	-0.200729	-0.481825	0.286033	0.373375	-0.210185	-0.599741	-0.495034	-0.162537	0.0200789	0.0292852	-0.287512	-0.493198	-0.126334	-0.0805604	-0.492047	-0.499482
Capana09g002063	0.181972	0.124734	-0.180888	-0.0565086	0.591604	0.0848205	0.256144	0.873374	-0.186	-0.318342	-0.771781	-0.367815	-0.103212	-0.289237	0.288766	-0.244053	0.635947	0.00740712	0.14113	-0.0931168	0.296076	-0.264658	0.170649	-0.334449	0.00492491	-0.0541498	-0.33699	0.118058	0.0891832	-0.322868	-0.161253	0.517081	0.376772	-0.246548	-0.280872	0.133144	0.393051	-0.271685	-0.351259	-0.270316	-0.371195	-0.124272	-0.289614	-0.316489	-0.403471	-0.285431	-0.381805	-0.307432	-0.318658
Capana10g002379	0.116742	0.391804	0.676073	0.744865	0.135188	0.192676	0.598221	-0.214198	0.338106	0.830692	0.390569	0.347565	0.237308	0.273192	-0.147866	0.544444	-0.154489	0.525437	0.705281	0.420076	0.513768	0.147415	0.0409727	-0.28714	0.0306046	0.706619	0.732315	-0.242427	0.603922	0.477025	0.446179	0.0634922	0.591733	0.503177	0.580358	0.591088	0.233135	0.554005	0.614143	0.603504	-0.0368001	-0.384465	-0.284453	-0.445298	0.793518	-0.0815076	-0.305701	0.889935	0.874445
Capana02g001064	-0.0200628	0.307373	0.386334	0.834618	0.279287	0.298357	0.650068	-0.0121382	0.531329	0.896558	0.140691	0.784628	0.437896	0.471127	-0.307552	0.826912	0.239673	0.661603	0.663019	0.471812	0.405968	0.0997987	0.378605	-0.466701	0.41653	0.779247	0.898462	0.469661	0.429031	0.829622	0.86926	0.376502	0.353649	0.59813	0.900994	0.404786	0.381415	0.640366	0.852276	0.891803	-0.203745	0.29102	-0.419432	0.163516	0.646668	0.195808	-0.524664	0.805472	0.815082
Capana03g000409	0.0195831	0.339976	0.530129	0.823586	0.194206	0.329078	0.567286	-0.318471	0.545718	0.895858	0.38656	0.557922	0.384581	0.454444	-0.298648	0.794534	-0.170728	0.657359	0.693183	0.583971	0.429118	0.264835	0.171817	-0.303116	0.160589	0.822036	0.895924	-0.0252659	0.659865	0.666135	0.65412	0.123932	0.528203	0.692129	0.681445	0.570035	0.302282	0.725687	0.758879	0.761772	-0.0277828	-0.0720256	-0.280148	-0.246635	0.871261	-0.0359316	-0.354861	0.877025	0.868842
Capana03g001891	0.0455345	0.372328	0.647529	0.815052	0.104133	0.193684	0.639087	-0.232683	0.398663	0.931658	0.418297	0.527719	0.288016	0.365364	-0.224788	0.660479	-0.0948522	0.584102	0.721868	0.449903	0.501655	0.139774	0.131179	-0.337156	0.118416	0.766523	0.842231	-0.0535966	0.561848	0.641055	0.597983	0.119949	0.526259	0.554441	0.742126	0.546977	0.224762	0.605303	0.752462	0.740845	-0.0778734	-0.22253	-0.339235	-0.278366	0.831994	0.0258932	-0.366136	0.95092	0.942415
Capana06g001366	0.0952848	-0.481558	-0.545611	0.257769	0.473775	0.696071	-0.292757	-0.385837	0.789831	0.00412503	0.0154728	0.0663137	0.592704	0.0692956	-0.430009	0.598062	-0.38196	0.536352	-0.142377	0.332768	-0.380404	0.768744	-0.11756	0.235735	0.418698	0.240634	0.360857	0.0109454	0.636239	0.113289	0.499597	-0.166142	-0.185183	0.614619	-0.022229	0.328939	0.527388	0.643678	0.0102026	0.0861504	0.300932	0.601498	0.331061	0.141657	0.0846868	-0.3282	0.122922	-0.0197672	-0.0159979
Capana09g000876	-0.38542	-0.108393	0.120071	-0.63923	-0.691605	-0.745122	-0.405923	-0.257559	-0.623353	-0.272263	0.52475	-0.170478	-0.488093	-0.147574	-0.0736153	-0.614032	-0.147817	-0.70002	-0.339159	-0.621973	-0.425769	-0.339729	-0.423185	0.387352	-0.435785	-0.650225	-0.498917	-0.232274	-0.756732	-0.321763	-0.607641	-0.40775	-0.44425	-0.570289	-0.235585	-0.710258	-0.756371	-0.555274	-0.247318	-0.378163	0.15022	-0.337467	0.232739	0.220196	-0.306717	0.0529833	0.483833	-0.216488	-0.209485
Capana09g001260	-0.358765	0.00331339	-0.0309599	-0.676846	-0.328541	-0.762741	-0.268394	0.222802	-0.78516	-0.421818	0.171834	-0.427857	-0.646481	-0.342123	0.0743754	-0.774291	0.151117	-0.78943	-0.259097	-0.705246	-0.236194	-0.508961	-0.400151	0.274555	-0.563188	-0.5759	-0.698187	-0.29436	-0.711646	-0.553354	-0.758002	-0.206109	-0.190678	-0.737868	-0.408835	-0.67571	-0.577239	-0.720813	-0.457491	-0.550707	-0.105626	-0.558489	0.0423165	-0.0825224	-0.520526	-0.200629	0.25596	-0.33023	-0.334655
Capana01g002803	0.0359232	0.186423	0.0702273	-0.617661	-0.234669	-0.61792	-0.119559	0.504485	-0.883924	-0.579845	-0.328241	-0.619025	-0.729566	-0.487045	0.587904	-0.908757	0.309972	-0.753325	-0.305758	-0.586654	0.082801	-0.666766	-0.147309	-0.0330739	-0.559145	-0.575592	-0.828113	-0.273383	-0.636462	-0.645676	-0.813347	-0.040564	-0.0391959	-0.864075	-0.523059	-0.396452	-0.464537	-0.878346	-0.607063	-0.653237	-0.251208	-0.625967	-0.094652	-0.251041	-0.54839	-0.0160516	0.0343187	-0.471894	-0.477062
Capana02g000680	-0.158338	-0.195159	0.107822	-0.680151	-0.666269	-0.622302	-0.542511	-0.332804	-0.580338	-0.409137	0.45169	-0.368241	-0.439336	-0.299481	0.0872199	-0.706867	-0.307864	-0.707103	-0.492378	-0.638803	-0.478589	-0.212753	-0.531522	0.450231	-0.4049	-0.729585	-0.584321	-0.428733	-0.655959	-0.483335	-0.673362	-0.566967	-0.51994	-0.57575	-0.388368	-0.578448	-0.695301	-0.54705	-0.419763	-0.531258	0.26866	-0.390628	0.375242	0.166255	-0.355364	0.0250528	0.592341	-0.295548	-0.290301
Capana02g003053	0.216707	-0.522863	-0.4875	0.146255	0.340775	0.666971	-0.441431	-0.550125	0.753	-0.0661129	0.227097	-0.00583099	0.553094	-0.00706573	-0.474218	0.49499	-0.451807	0.338136	-0.266033	0.220663	-0.517395	0.77415	-0.2589	0.284311	0.376658	0.137285	0.293331	-0.13162	0.50931	-0.00296665	0.408357	-0.41641	-0.359479	0.567772	-0.0814268	0.276625	0.473442	0.635013	-0.0664112	0.0218913	0.254495	0.555544	0.387338	0.233104	0.000188097	-0.337833	0.246342	-0.0434052	-0.0298223
Capana02g003339	0.522049	-0.409946	-0.416367	0.150684	0.608751	0.836127	-0.339434	-0.188438	0.771313	-0.181656	-0.116363	-0.164501	0.739943	-0.148215	-0.283141	0.337965	-0.258662	0.413339	-0.130048	0.19579	-0.393953	0.794674	-0.255122	0.379231	0.691399	0.0694563	0.182435	-0.139238	0.575202	-0.18309	0.35904	-0.229853	-0.231035	0.553222	-0.185406	0.420013	0.810788	0.637947	-0.209397	-0.0412786	0.448854	0.543743	0.541118	0.137189	-0.222605	-0.243637	0.35396	-0.128166	-0.124994
Capana09g000676	0.519204	0.0371389	-0.124261	-0.137444	-0.180909	0.0959966	-0.0035356	0.260725	-0.289647	-0.376524	-0.411603	-0.380042	-0.268853	-0.298038	0.652639	-0.442878	0.0442798	-0.281654	-0.320127	0.0362946	0.356195	-0.197928	0.266434	-0.161808	-0.103609	-0.0526219	-0.364995	-0.100911	-0.128873	-0.283124	-0.283704	-0.0686665	-0.0208852	-0.304275	-0.281267	0.217396	0.00410451	-0.345314	-0.342184	-0.280498	-0.305929	-0.176059	-0.153543	-0.253187	-0.238961	0.350509	-0.102707	-0.319918	-0.322474
Capana02g000909	-0.263629	-0.00631114	0.233552	-0.53234	-0.714234	-0.729398	-0.277119	-0.2235	-0.678069	-0.212483	0.462202	-0.206196	-0.60781	-0.158448	0.115624	-0.607377	-0.121465	-0.721101	-0.326569	-0.513539	-0.202786	-0.442518	-0.291476	0.0906096	-0.603384	-0.491308	-0.460363	-0.301019	-0.674726	-0.284237	-0.605625	-0.399231	-0.296877	-0.585322	-0.205801	-0.540602	-0.781068	-0.586607	-0.214641	-0.34677	-0.138974	-0.504459	-0.0303012	0.0761663	-0.153032	0.0328519	0.224991	-0.140934	-0.13341
Capana09g000311	-0.205778	0.0192115	0.230083	-0.634264	-0.610411	-0.717041	-0.399809	-0.194508	-0.696291	-0.355541	0.295217	-0.363247	-0.549816	-0.281899	0.246093	-0.72076	-0.221574	-0.690004	-0.381937	-0.617919	-0.320546	-0.370714	-0.455124	0.380066	-0.49313	-0.678893	-0.591486	-0.410716	-0.671793	-0.454958	-0.7106	-0.4291	-0.361347	-0.657359	-0.357417	-0.578538	-0.755895	-0.63978	-0.381901	-0.508514	0.281897	-0.512348	0.316817	0.046228	-0.282332	0.0732982	0.488041	-0.247947	-0.248213
Capana02g002988	-0.163867	-0.0370046	-0.126466	-0.724622	-0.0115215	-0.548807	-0.463886	0.237456	-0.594075	-0.573727	-0.0146593	-0.541116	-0.423842	-0.467154	0.0935771	-0.736423	0.137017	-0.744915	-0.36846	-0.771021	-0.477425	-0.319147	-0.573082	0.446778	-0.306997	-0.670134	-0.738187	-0.345917	-0.632069	-0.716259	-0.694612	-0.293429	-0.349328	-0.660196	-0.530276	-0.653214	-0.325908	-0.588126	-0.617421	-0.644296	0.16332	-0.364854	0.340748	0.0902048	-0.711524	-0.285948	0.424242	-0.450395	-0.449094
Capana00g004709	-0.251298	0.0869837	0.240218	-0.651989	-0.472986	-0.777478	-0.289002	0.045798	-0.780293	-0.392243	0.15602	-0.401385	-0.609071	-0.326272	0.221803	-0.760779	0.0244701	-0.681654	-0.268666	-0.694533	-0.26887	-0.506549	-0.429176	0.275107	-0.518693	-0.740491	-0.66343	-0.322998	-0.705261	-0.50058	-0.745104	-0.244574	-0.254126	-0.750984	-0.377773	-0.612017	-0.699999	-0.733579	-0.426635	-0.547575	0.175653	-0.539817	0.220939	-0.00936701	-0.386999	-0.0241721	0.381163	-0.291141	-0.291568
Capana06g002136	-0.256826	-0.0799438	0.192105	-0.572151	-0.621588	-0.635188	-0.4656	-0.390696	-0.528618	-0.26107	0.482097	-0.267991	-0.405799	-0.21059	0.0556547	-0.577404	-0.376513	-0.585856	-0.36502	-0.571166	-0.440452	-0.188228	-0.540017	0.527413	-0.392767	-0.629107	-0.454802	-0.43136	-0.582204	-0.374716	-0.595539	-0.526771	-0.434658	-0.498941	-0.284877	-0.56542	-0.71404	-0.464628	-0.294237	-0.423286	0.433699	-0.40897	0.442486	0.110497	-0.208209	0.0519178	0.611724	-0.156138	-0.156137
Capana08g000973	-0.362966	-0.0437108	0.295221	-0.492515	-0.677175	-0.68188	-0.358788	-0.392614	-0.490337	-0.106859	0.545149	-0.0453209	-0.354217	-0.0523331	-0.048456	-0.452776	-0.260687	-0.522773	-0.257628	-0.519893	-0.414822	-0.248174	-0.423678	0.368035	-0.341535	-0.572885	-0.319433	-0.234111	-0.625134	-0.175053	-0.460865	-0.400876	-0.40998	-0.431767	-0.102398	-0.611343	-0.745708	-0.411573	-0.10038	-0.242959	0.330203	-0.299365	0.304521	0.278167	-0.0996069	0.113516	0.493027	-0.0582848	-0.0516355
Capana10g000711	-0.263864	0.108356	0.583792	0.313318	-0.456193	-0.21981	0.180121	-0.550056	0.143936	0.687201	0.745925	0.607046	0.169252	0.398464	-0.356877	0.346694	-0.247727	0.176346	0.316525	0.068964	-0.0253067	0.0536321	-0.0742319	0.000480779	0.0845784	0.204113	0.550045	0.0654192	-0.0390958	0.559584	0.340367	-0.144855	-0.0503557	0.274813	0.63227	-0.063749	-0.294154	0.312248	0.64824	0.555002	0.193556	-0.0263954	-0.0230585	0.304136	0.570567	0.255494	0.0896865	0.659896	0.66826
Capana10g000712	-0.224354	0.0694876	0.55542	0.322603	-0.434321	-0.201907	0.157668	-0.568248	0.154714	0.677668	0.779125	0.563191	0.157767	0.334768	-0.378696	0.342719	-0.259825	0.168968	0.289764	0.0276374	-0.0504367	0.0762294	-0.13157	0.0139197	0.0730115	0.200817	0.545082	0.0169498	-0.0191496	0.524212	0.349308	-0.208555	-0.0877909	0.263207	0.629498	-0.0369335	-0.272191	0.320354	0.613165	0.525532	0.172684	-0.0466589	-0.0150618	0.281309	0.539464	0.212378	0.0969886	0.677763	0.687874
Capana11g002005	0.332609	-0.144403	-0.392371	-0.38624	0.0985956	-0.0267404	-0.127773	0.559348	-0.430544	-0.68502	-0.598668	-0.698328	-0.375189	-0.556651	0.505819	-0.643474	0.241875	-0.328247	-0.361023	-0.284685	0.13278	-0.236403	0.00791899	-0.0119848	-0.209266	-0.389871	-0.690703	-0.163204	-0.155679	-0.619784	-0.508104	0.0475737	-0.0238836	-0.53796	-0.587877	0.0369478	0.0520894	-0.566973	-0.69949	-0.652376	-0.241502	-0.242788	-0.0320079	-0.386475	-0.617701	-0.0691048	-0.0146543	-0.589321	-0.598762
Capana12g000846	0.427103	-0.0553032	-0.475424	-0.0556319	0.710313	0.411158	-0.0551907	0.574471	0.0729092	-0.488049	-0.787755	-0.539799	0.0329888	-0.425521	0.338927	-0.144748	0.268288	0.0519781	-0.163952	-0.00315245	0.0888574	0.0813061	0.0261782	-0.0578761	0.110164	-0.00737445	-0.326026	-0.0924169	0.2828	-0.462303	-0.0914389	0.162001	0.127411	-0.0964818	-0.44744	0.289332	0.544408	-0.0804198	-0.531262	-0.398366	-0.130577	0.0487491	0.0314657	-0.317724	-0.460789	-0.304087	-0.169471	-0.420461	-0.428354
Capana12g000908	0.339354	-0.0579897	-0.274191	-0.261947	0.538193	0.130837	-0.0506002	0.717063	-0.185705	-0.560153	-0.719986	-0.61457	-0.0522735	-0.487576	0.344554	-0.446767	0.400927	-0.120432	-0.110144	-0.256079	0.0445805	-0.0937467	-0.0955927	-0.0242084	0.0665649	-0.301821	-0.531803	-0.127522	0.0495962	-0.595475	-0.332283	0.231821	0.131334	-0.315164	-0.521584	0.091925	0.387524	-0.308614	-0.615627	-0.521898	-0.0818394	-0.144092	0.0500521	-0.276248	-0.605807	-0.310094	-0.0375808	-0.477999	-0.490212
Capana12g000930	-0.476613	0.0488667	0.444206	-0.0376447	-0.716339	-0.494423	0.0168352	-0.512794	-0.157342	0.43517	0.806085	0.497119	-0.0870941	0.395042	-0.346795	0.0444977	-0.223946	-0.178961	0.133382	-0.0818617	-0.123189	-0.13537	-0.0701214	0.0901117	-0.154024	-0.0298826	0.239944	0.0659182	-0.37945	0.38676	0.00107153	-0.179572	-0.14485	0.0246116	0.395543	-0.392496	-0.577668	0.0110549	0.479448	0.34543	0.0792046	-0.108628	-0.0500132	0.336593	0.372146	0.257663	0.186605	0.372703	0.379705
Capana03g000494	-0.0171653	-0.0227861	-0.285023	-0.671847	-0.085184	-0.522588	-0.280206	0.465944	-0.800746	-0.724602	-0.308481	-0.76543	-0.748434	-0.624766	0.419726	-0.872012	0.235854	-0.743038	-0.444038	-0.656359	-0.0871017	-0.519451	-0.288079	0.148701	-0.599382	-0.599716	-0.896928	-0.343846	-0.553742	-0.778663	-0.811694	-0.16588	-0.159834	-0.862551	-0.653683	-0.411885	-0.380754	-0.850293	-0.775442	-0.808041	-0.238662	-0.54349	0.0123264	-0.335365	-0.714564	-0.224559	0.106503	-0.583296	-0.588276
Capana03g000696	-0.315591	0.0439272	0.0538961	-0.611288	-0.142447	-0.717118	-0.15929	0.385278	-0.737993	-0.37816	0.0812347	-0.404873	-0.599489	-0.321024	0.0387983	-0.705995	0.376778	-0.763154	-0.15406	-0.680312	-0.182466	-0.567097	-0.341851	-0.0346007	-0.566862	-0.503263	-0.65117	-0.236192	-0.633811	-0.532515	-0.688667	-0.0655613	-0.0550352	-0.68657	-0.376965	-0.605431	-0.438072	-0.670001	-0.424231	-0.495369	-0.383994	-0.567332	-0.194445	-0.0373217	-0.499928	-0.400887	0.00697248	-0.300765	-0.299862
Capana03g001055	0.00122876	0.365042	0.652102	0.841184	0.0317844	0.18055	0.688478	-0.208961	0.41293	0.984389	0.403997	0.672867	0.327909	0.458867	-0.246744	0.706277	-0.0171591	0.617376	0.740473	0.487196	0.524055	0.101854	0.254144	-0.405587	0.201555	0.775655	0.895621	0.131797	0.495189	0.769884	0.682961	0.215985	0.494079	0.575181	0.848684	0.504298	0.204554	0.607778	0.856778	0.843274	-0.120835	-0.0889715	-0.400592	-0.135439	0.851048	0.1618	-0.41303	0.956125	0.952181
Capana03g001450	0.262127	0.248214	-0.234054	-0.0725808	0.527661	0.0618771	0.244079	0.844399	-0.308872	-0.398441	-0.860845	-0.474863	-0.316462	-0.368631	0.507408	-0.306316	0.5632	-0.0981819	0.0235746	-0.0617932	0.406736	-0.373403	0.235562	-0.326299	-0.171651	-0.00885239	-0.416426	0.0383877	0.032764	-0.382378	-0.249945	0.414579	0.360344	-0.370511	-0.347985	0.166652	0.279601	-0.394608	-0.430993	-0.349759	-0.421726	-0.216342	-0.300077	-0.473593	-0.3973	-0.166564	-0.422661	-0.360206	-0.370803
Capana05g002225	0.0178539	-0.363648	-0.272295	-0.76094	-0.242306	-0.371464	-0.652562	-0.085207	-0.468314	-0.691358	0.261288	-0.677985	-0.37846	-0.547808	-0.0354893	-0.756693	-0.143991	-0.742177	-0.56776	-0.71312	-0.583013	-0.0779014	-0.654372	0.505347	-0.344104	-0.746481	-0.756301	-0.531508	-0.508133	-0.800791	-0.726292	-0.586182	-0.517243	-0.566179	-0.662693	-0.480692	-0.313568	-0.498532	-0.738685	-0.762106	0.0994147	-0.330968	0.39399	0.0101659	-0.714765	-0.339408	0.569979	-0.524725	-0.519926
Capana06g000933	-0.366711	0.271714	0.328277	0.477479	-0.175337	0.181845	0.431731	-0.283194	0.471386	0.701872	0.289032	0.954701	0.44659	0.933451	-0.412692	0.760236	0.0261542	0.464417	0.545747	0.750232	0.269696	0.107883	0.644513	-0.374695	0.302919	0.608844	0.771078	0.625336	0.182608	0.898323	0.583967	0.468998	0.362221	0.701346	0.621642	0.0717243	0.0638618	0.579502	0.911559	0.892445	-0.125355	0.502411	-0.362791	0.366859	0.761869	0.34064	-0.329623	0.412816	0.416474
Capana06g001024	-0.0715603	0.153148	0.423205	0.811871	0.0564476	0.353656	0.542971	-0.303541	0.64842	0.92539	0.361072	0.837661	0.576359	0.613438	-0.412141	0.869472	-0.0568905	0.744913	0.633611	0.605569	0.32484	0.307212	0.353571	-0.341674	0.449534	0.741801	0.968864	0.381378	0.526706	0.89043	0.848251	0.282426	0.332523	0.762296	0.853202	0.440273	0.306811	0.76075	0.910553	0.91599	-0.0138841	0.325006	-0.291356	0.175614	0.810806	0.220507	-0.337997	0.80543	0.808056
Capana06g002097	0.469426	-0.417777	-0.68208	0.0297337	0.629465	0.731794	-0.383774	-0.0515863	0.52778	-0.434944	-0.369091	-0.45109	0.366893	-0.357819	-0.0454202	0.174343	-0.249304	0.29059	-0.334449	0.124406	-0.300626	0.620129	-0.212235	0.330628	0.32963	-0.000886739	-0.0784619	-0.225212	0.538426	-0.373777	0.150495	-0.239968	-0.206691	0.270838	-0.419492	0.40447	0.639935	0.329503	-0.477053	-0.33742	0.276509	0.383038	0.447962	-0.162032	-0.342266	-0.341888	0.212392	-0.347873	-0.348872
Capana12g000182	0.422796	-0.179735	-0.492426	0.051991	0.595396	0.677383	-0.428235	-0.278033	0.586015	-0.267838	-0.128288	-0.238992	0.403484	-0.200314	-0.16885	0.319995	-0.30183	0.179406	-0.268949	0.133525	-0.427242	0.591203	-0.283496	0.451832	0.377007	0.0903048	0.0810515	-0.22237	0.380965	-0.264323	0.229597	-0.400778	-0.314445	0.364586	-0.261025	0.251884	0.577531	0.477257	-0.285099	-0.132437	0.404525	0.457828	0.570529	0.0559744	-0.246342	-0.225807	0.322984	-0.192272	-0.181508
Capana02g000302	0.531114	0.179932	-0.184036	0.0754892	0.0560254	0.262265	0.156494	0.342522	-0.148177	-0.276332	-0.624744	-0.307845	-0.215907	-0.240418	0.688568	-0.205131	0.0885751	-0.0275965	-0.179097	0.225473	0.504912	-0.163081	0.408526	-0.199758	-0.0399169	0.146019	-0.208065	0.00841475	0.0744761	-0.15285	-0.0979762	0.0972107	0.135813	-0.184668	-0.188722	0.383219	0.156376	-0.227054	-0.24882	-0.164902	-0.244171	-0.0662436	-0.159158	-0.39617	-0.121748	0.38225	-0.238566	-0.243314	-0.249402
Capana02g003352	-0.40892	-0.101633	0.128406	-0.701046	-0.585803	-0.80169	-0.408991	-0.144188	-0.692186	-0.338459	0.464747	-0.272861	-0.55756	-0.211651	-0.065307	-0.679172	-0.0416065	-0.776934	-0.33873	-0.698273	-0.44147	-0.410351	-0.47565	0.26915	-0.547617	-0.689618	-0.587057	-0.294452	-0.758199	-0.426312	-0.692378	-0.374155	-0.378152	-0.639919	-0.32673	-0.738948	-0.747605	-0.623957	-0.337619	-0.470913	0.00557754	-0.443765	0.131469	0.180319	-0.363644	-0.150925	0.382245	-0.268162	-0.26109
Capana08g001999	-0.239201	-0.0382598	0.00732555	0.333452	-0.208584	0.154939	0.156081	-0.275193	0.424135	0.483658	0.228647	0.853785	0.410649	0.587443	-0.387074	0.599326	0.0757271	0.344928	0.157324	0.355561	-0.0487544	0.132032	0.442121	-0.14624	0.489888	0.308925	0.586761	0.754594	-0.0654854	0.766171	0.661163	0.228138	-0.197133	0.447376	0.654162	-0.0930258	0.0341047	0.414052	0.689105	0.696202	-0.00520972	0.763002	-0.120199	0.712725	0.332268	0.524349	-0.125466	0.269904	0.294487
Capana11g001813	0.193264	0.211792	0.0951815	-0.522898	-0.0750585	-0.431902	-0.0673857	0.614864	-0.741918	-0.569917	-0.559152	-0.59663	-0.51689	-0.468556	0.715709	-0.853597	0.329321	-0.582011	-0.252437	-0.473171	0.149888	-0.555723	-0.0653222	-0.0304168	-0.308607	-0.521398	-0.766609	-0.203113	-0.494698	-0.611949	-0.703478	0.0899245	0.0244644	-0.746126	-0.504894	-0.254463	-0.259176	-0.769448	-0.588024	-0.594267	-0.0919016	-0.50925	-0.00859576	-0.210952	-0.537697	0.0850702	0.045375	-0.479481	-0.489558
Capana04g001876	0.442713	0.176221	-0.298818	-0.0324989	0.570684	0.267861	0.14089	0.724102	-0.133245	-0.421955	-0.859405	-0.486112	-0.140841	-0.375583	0.534668	-0.249256	0.410658	-0.0483724	-0.0629518	0.0323552	0.350177	-0.175823	0.215572	-0.215648	0.00464782	0.0562009	-0.354667	-0.0191092	0.136667	-0.397371	-0.169311	0.288243	0.268579	-0.22541	-0.369472	0.278588	0.426557	-0.234793	-0.446632	-0.323495	-0.295788	-0.0989254	-0.159388	-0.409412	-0.399075	-0.0963659	-0.310833	-0.372053	-0.381935
Capana11g000350	0.233584	0.256569	-0.199155	-0.252102	0.464025	-0.0869092	0.0541338	0.778611	-0.441867	-0.525046	-0.897258	-0.582237	-0.406289	-0.458072	0.671096	-0.473189	0.454422	-0.279369	-0.167291	-0.225396	0.248981	-0.420293	0.0861016	-0.208019	-0.251406	-0.177472	-0.573809	-0.0822384	-0.120261	-0.52045	-0.404731	0.269128	0.207752	-0.523397	-0.466814	-0.00220725	0.0999123	-0.536104	-0.560321	-0.50404	-0.255879	-0.298164	-0.141373	-0.354806	-0.472193	-0.158611	-0.288769	-0.459183	-0.468365
Capana04g000852	-0.472179	0.101558	0.495233	0.00170095	-0.712708	-0.48805	0.0831987	-0.482128	-0.152758	0.474848	0.783039	0.551266	-0.092045	0.448606	-0.340611	0.0875594	-0.154456	-0.163226	0.181663	-0.0281208	-0.0632713	-0.183623	0.0118418	-0.0321027	-0.166735	0.0152856	0.279401	0.126202	-0.375298	0.444675	0.0351259	-0.113997	-0.0888573	0.0464306	0.436587	-0.367554	-0.568369	0.021994	0.535078	0.403704	-0.0226465	-0.0923473	-0.149466	0.351385	0.422329	0.266285	0.0887427	0.391708	0.401131
Capana12g001527	0.285313	0.29766	-0.10982	-0.14228	0.355364	-0.0509214	0.23763	0.858083	-0.43053	-0.404955	-0.882948	-0.4434	-0.347605	-0.352228	0.671964	-0.447252	0.550523	-0.199156	-0.0254118	-0.107548	0.444548	-0.46354	0.277119	-0.318265	-0.145475	-0.0825966	-0.478276	0.0652983	-0.117167	-0.371354	-0.324767	0.415665	0.31182	-0.462037	-0.326462	0.0882421	0.154356	-0.501976	-0.411635	-0.34498	-0.360933	-0.263058	-0.280988	-0.371646	-0.398605	0.0321582	-0.365512	-0.375868	-0.387073
Capana01g003545	-0.158328	0.501996	0.659992	0.740462	0.00467536	0.165673	0.672496	-0.229353	0.415958	0.932722	0.34701	0.778011	0.338207	0.70691	-0.273624	0.764923	-0.00420331	0.568704	0.786414	0.672048	0.519347	0.0545585	0.427464	-0.438503	0.153441	0.790605	0.88421	0.244343	0.426962	0.823063	0.599792	0.360662	0.609415	0.657088	0.741647	0.376427	0.145916	0.621334	0.919923	0.899401	-0.118875	0.0215382	-0.419838	-0.0734511	0.931201	0.175241	-0.431897	0.799914	0.793627
Capana03g003558	-0.164975	0.000809051	0.397457	0.537097	-0.301545	0.161626	0.233583	-0.633394	0.519864	0.792727	0.727742	0.774731	0.470572	0.575623	-0.521805	0.671507	-0.314339	0.454476	0.389123	0.407962	0.0323171	0.338077	0.120951	-0.0448906	0.334612	0.487926	0.811995	0.211804	0.255822	0.753402	0.631733	-0.0688981	0.0178609	0.641105	0.727266	0.177417	0.0198305	0.655955	0.804412	0.768914	0.146235	0.281683	-0.0641222	0.327386	0.702926	0.273287	0.00506384	0.702675	0.710893
Capana02g000491	0.341913	0.220788	-0.210468	-0.1356	0.160627	-0.0332039	0.129576	0.626816	-0.446668	-0.431232	-0.785585	-0.489484	-0.465385	-0.397021	0.786407	-0.454844	0.30194	-0.260216	-0.231526	-0.0563344	0.456618	-0.414092	0.288954	-0.268985	-0.279201	-0.0248674	-0.476379	-0.0433204	-0.11375	-0.359946	-0.336897	0.185038	0.179324	-0.486414	-0.340395	0.143156	0.00464721	-0.528437	-0.438739	-0.390035	-0.382319	-0.296038	-0.26398	-0.42883	-0.316485	0.144855	-0.340178	-0.374037	-0.383048
Capana04g001844	-0.441396	0.211513	0.599064	0.143845	-0.641506	-0.39214	0.197282	-0.482792	-0.0437714	0.601328	0.717406	0.657868	0.0210915	0.557308	-0.307772	0.226794	-0.168618	-0.00130379	0.315004	0.125157	0.0411604	-0.136818	0.105986	-0.0716045	-0.0671106	0.143066	0.423792	0.17736	-0.250003	0.569544	0.151882	-0.00895715	0.034057	0.179115	0.531386	-0.255397	-0.48334	0.143916	0.663719	0.541396	0.0655054	-0.0475844	-0.145181	0.325041	0.572377	0.337656	0.043545	0.492205	0.497795
Capana06g001874	-0.339326	0.269484	0.645974	0.435992	-0.460388	-0.205836	0.424089	-0.404626	0.140391	0.821851	0.665246	0.782997	0.153972	0.610057	-0.34542	0.458354	-0.082243	0.243631	0.512071	0.295373	0.238969	-0.0694963	0.229314	-0.248421	0.0544342	0.41897	0.666959	0.257827	-0.0085504	0.750882	0.409348	0.116975	0.203975	0.363183	0.742786	-0.00472971	-0.259482	0.342407	0.839691	0.74952	-0.0598807	-0.00717047	-0.308571	0.232479	0.731628	0.331024	-0.167873	0.712155	0.716808
Capana08g000284	-0.386716	-0.0592512	0.194566	-0.478053	-0.748857	-0.661415	-0.364441	-0.428152	-0.479734	-0.0961575	0.556799	0.0159614	-0.365069	-0.00897921	-0.0395135	-0.428302	-0.307982	-0.528439	-0.301529	-0.46175	-0.382812	-0.235102	-0.341089	0.431173	-0.316068	-0.508224	-0.293612	-0.163176	-0.661334	-0.112504	-0.425029	-0.415902	-0.456622	-0.414862	-0.0617302	-0.629748	-0.770724	-0.405169	-0.0565907	-0.195861	0.333095	-0.223335	0.310655	0.294877	-0.0935671	0.247209	0.508884	-0.0684783	-0.0619335
Capana09g000202	-0.175146	0.0504202	0.279517	-0.402765	-0.469074	-0.475657	-0.346004	-0.316028	-0.370124	-0.159666	0.216907	-0.116696	-0.215781	-0.0951573	0.193876	-0.397643	-0.330222	-0.338207	-0.259966	-0.39156	-0.340524	-0.136967	-0.368177	0.45618	-0.160538	-0.526688	-0.2997	-0.244968	-0.448584	-0.203027	-0.39344	-0.322677	-0.349262	-0.358489	-0.160254	-0.438179	-0.574008	-0.340749	-0.158806	-0.263479	0.61023	-0.216241	0.497693	0.205097	-0.0832408	0.230403	0.543969	-0.106397	-0.107136
Capana10g001067	0.215562	0.216023	-0.307732	-0.333619	0.249203	-0.134834	0.0264112	0.71389	-0.544234	-0.608429	-0.790168	-0.614687	-0.545508	-0.464074	0.643223	-0.561583	0.408696	-0.380949	-0.238063	-0.219443	0.284514	-0.476786	0.149545	-0.126442	-0.351614	-0.233067	-0.659137	-0.0692783	-0.241033	-0.546946	-0.508206	0.201881	0.144216	-0.606882	-0.523858	-0.0472004	-0.0133146	-0.638062	-0.604167	-0.557216	-0.323086	-0.297527	-0.148798	-0.446071	-0.533888	-0.030554	-0.217577	-0.548053	-0.556768
Capana00g000052	-0.31559	-0.250611	-0.0380784	-0.53511	-0.533934	-0.598107	-0.369393	-0.220922	-0.50229	-0.249851	0.591466	-0.225531	-0.473244	-0.21165	-0.227795	-0.508658	-0.0744421	-0.672135	-0.335261	-0.57598	-0.390673	-0.258089	-0.423396	0.191697	-0.498753	-0.476767	-0.429205	-0.282492	-0.581603	-0.337716	-0.507254	-0.450804	-0.38662	-0.471516	-0.226735	-0.553927	-0.574166	-0.438656	-0.269032	-0.368772	-0.214892	-0.353888	-0.00654907	0.121495	-0.315536	-0.217283	0.266458	-0.167153	-0.156157
Capana01g002097	-0.420413	0.0501969	0.402161	-0.335978	-0.752632	-0.61902	-0.219964	-0.48197	-0.371049	0.103404	0.634614	0.196478	-0.242507	0.188763	-0.112343	-0.263792	-0.300381	-0.395181	-0.102564	-0.291203	-0.284281	-0.209967	-0.241253	0.291922	-0.263897	-0.366201	-0.0999297	-0.110843	-0.55377	0.0666893	-0.312113	-0.30103	-0.288286	-0.237515	0.0735736	-0.546218	-0.72714	-0.249551	0.152539	0.00667886	0.312032	-0.215263	0.21124	0.312196	0.134841	0.250826	0.416918	0.0867701	0.0913361
Capana04g001932	0.172359	0.402851	0.607771	0.787516	0.223957	0.253624	0.570121	-0.233259	0.390454	0.829988	0.36134	0.341781	0.239897	0.218102	-0.147296	0.60636	-0.153848	0.540544	0.662204	0.403151	0.476334	0.172917	0.0110847	-0.252806	0.0632144	0.747279	0.762857	-0.236564	0.620285	0.473974	0.520444	-0.000852364	0.517394	0.510335	0.6136	0.614645	0.286238	0.593438	0.600674	0.610587	-0.0217109	-0.320242	-0.239757	-0.419865	0.756146	-0.0715748	-0.3107	0.909635	0.899362
Capana06g000364	-0.287246	0.300281	0.507546	0.585348	-0.226933	0.0974235	0.496551	-0.318778	0.418362	0.841686	0.366702	0.94927	0.416075	0.799696	-0.332925	0.725596	-0.0173473	0.516679	0.582559	0.602038	0.304925	0.0790061	0.501556	-0.329595	0.32579	0.589201	0.829667	0.53193	0.188319	0.926654	0.647388	0.369954	0.301836	0.618257	0.786096	0.134722	0.00337378	0.552393	0.953722	0.915608	0.00262484	0.35535	-0.299637	0.338261	0.807404	0.430636	-0.279141	0.631325	0.635726
Capana06g002443	0.0645472	-0.460955	-0.629014	0.0450149	0.504915	0.651087	-0.339527	-0.173772	0.666265	-0.240593	-0.202024	-0.0452916	0.55837	0.0542788	-0.3769	0.419359	-0.221989	0.444508	-0.165796	0.281668	-0.416979	0.669499	-0.0555259	0.28779	0.44273	0.0167064	0.12752	0.108345	0.494849	-0.0443675	0.305043	0.00656718	-0.15913	0.48797	-0.244917	0.194116	0.539254	0.47517	-0.160062	-0.0724123	0.350482	0.668701	0.40188	0.149987	-0.13625	-0.314501	0.203182	-0.308686	-0.308409
Capana08g002245	-0.195564	-0.039721	-0.0584626	-0.730189	-0.360709	-0.715317	-0.318486	0.236294	-0.828619	-0.558428	0.0955474	-0.560637	-0.711571	-0.453718	0.186159	-0.865764	0.169379	-0.850001	-0.375418	-0.729296	-0.225717	-0.537699	-0.384767	0.18492	-0.612433	-0.664648	-0.803803	-0.340289	-0.723943	-0.657384	-0.823934	-0.265323	-0.24599	-0.816108	-0.5149	-0.60309	-0.570326	-0.799401	-0.589598	-0.667533	-0.210223	-0.570381	0.011837	-0.114364	-0.601697	-0.196748	0.228909	-0.441322	-0.44074
Capana10g001975	-0.173563	-0.00731798	-0.00534064	-0.76726	-0.363796	-0.752305	-0.368984	0.219099	-0.865028	-0.58599	0.0427884	-0.59483	-0.728392	-0.483076	0.296813	-0.913235	0.126201	-0.892538	-0.436161	-0.766802	-0.256379	-0.554364	-0.424008	0.195135	-0.628005	-0.704222	-0.84159	-0.389059	-0.752573	-0.693474	-0.861403	-0.305665	-0.280234	-0.85919	-0.543938	-0.630779	-0.623688	-0.838811	-0.623314	-0.708168	-0.138642	-0.609045	0.0636536	-0.0695724	-0.59573	-0.179416	0.253531	-0.457613	-0.456797
Capana11g000176	0.300093	-0.593841	-0.575171	0.140588	0.428292	0.798557	-0.419222	-0.394373	0.815092	-0.16069	0.0182627	-0.0664931	0.704487	-0.0320388	-0.408695	0.442384	-0.429323	0.477456	-0.232841	0.275457	-0.469869	0.874545	-0.199026	0.389507	0.579966	0.0746051	0.237242	-0.066293	0.603404	-0.0512432	0.403837	-0.260405	-0.301629	0.606737	-0.166415	0.359941	0.636439	0.645634	-0.14239	-0.0289107	0.43273	0.648061	0.509566	0.17845	-0.0969282	-0.259516	0.343744	-0.156511	-0.153207
Capana01g004107	-0.217569	0.161228	0.326056	0.629409	-0.11731	0.27345	0.4745	-0.281941	0.570799	0.803608	0.322188	0.970532	0.541139	0.799871	-0.437193	0.817166	0.0396951	0.592521	0.548397	0.668699	0.27055	0.195934	0.562536	-0.374366	0.456044	0.647528	0.873572	0.633056	0.277927	0.94804	0.766641	0.399671	0.2593	0.72729	0.788608	0.210493	0.184747	0.661261	0.942393	0.94362	-0.106259	0.539145	-0.343953	0.404744	0.734165	0.385088	-0.332998	0.574082	0.582821
Capana01g000046	-0.320421	0.0110419	0.379504	-0.412378	-0.629309	-0.571176	-0.351881	-0.511652	-0.350919	-0.0312119	0.582992	0.0432727	-0.266418	0.0764031	-0.0823152	-0.289712	-0.299457	-0.473548	-0.22598	-0.358015	-0.413508	-0.185176	-0.356164	0.208468	-0.343779	-0.446788	-0.186185	-0.237897	-0.518847	-0.0856106	-0.368383	-0.413286	-0.35021	-0.267309	-0.0719432	-0.526367	-0.688922	-0.257341	-0.00163565	-0.132168	0.235873	-0.237218	0.220554	0.343265	0.0621948	0.0417942	0.383323	-0.0124529	-0.000766876
Capana02g003485	-0.321925	0.14284	0.124389	0.367907	-0.0831843	0.333045	0.240741	-0.345867	0.586788	0.511451	0.212263	0.849069	0.547203	0.913078	-0.446957	0.764245	-0.077121	0.463526	0.401542	0.795765	0.107852	0.272647	0.602766	-0.241389	0.372783	0.531925	0.689009	0.587343	0.242083	0.775486	0.5409	0.405549	0.272791	0.77168	0.423876	0.0655202	0.16233	0.637623	0.76394	0.771123	-0.0115363	0.653762	-0.198517	0.409193	0.650677	0.255568	-0.204209	0.208265	0.211525
Capana04g000966	-0.171585	0.166415	0.119322	0.513136	0.00441531	0.329195	0.314362	-0.257017	0.578137	0.617039	0.179431	0.897666	0.507817	0.717152	-0.403466	0.799637	0.0811692	0.487073	0.376506	0.603801	0.118112	0.190316	0.537184	-0.257408	0.495368	0.568357	0.76005	0.688926	0.166841	0.833628	0.745896	0.32577	0.0805232	0.659032	0.676372	0.103423	0.226126	0.618343	0.802335	0.841327	-0.0553927	0.714288	-0.205727	0.524336	0.529281	0.41196	-0.265195	0.386536	0.40442
Capana05g001741	-0.0099141	0.147769	0.385727	0.840223	0.208083	0.382339	0.505839	-0.348625	0.629623	0.880042	0.393252	0.570248	0.456322	0.41674	-0.379786	0.839313	-0.203889	0.743496	0.616165	0.551818	0.339154	0.372466	0.139984	-0.275406	0.232773	0.790181	0.916096	0.0336974	0.718825	0.695182	0.743784	0.109851	0.426486	0.723698	0.707274	0.581674	0.335265	0.759418	0.741424	0.739792	-0.00756326	0.0427388	-0.252639	-0.169405	0.830569	-0.0717328	-0.338989	0.860599	0.854428
Capana08g000474	-0.377731	0.0578861	0.379095	-0.107474	-0.45034	-0.392704	-0.145316	-0.598191	-0.100395	0.276389	0.821827	0.213472	-0.162245	0.242358	-0.393165	0.0651478	-0.301447	-0.282649	0.0448704	-0.113335	-0.266641	-0.0543254	-0.295903	0.053427	-0.380692	-0.0244509	0.152038	-0.272026	-0.221351	0.118514	-0.123697	-0.392247	-0.104611	0.0445087	0.131294	-0.31188	-0.478392	0.0716342	0.249853	0.13978	-0.033118	-0.265825	-0.0299634	0.153885	0.327601	-0.194663	0.144329	0.287383	0.296788
Capana09g000818	-0.444613	0.182037	0.577212	0.130133	-0.656583	-0.410141	0.186502	-0.473879	-0.0610248	0.58988	0.728349	0.653461	0.00296286	0.534573	-0.317262	0.208133	-0.148621	-0.0239394	0.290331	0.0905355	0.0260429	-0.150866	0.0974876	-0.0818789	-0.0740798	0.124354	0.407206	0.190552	-0.277106	0.563099	0.151527	-0.02145	0.00102447	0.152544	0.537995	-0.273672	-0.495802	0.121501	0.6518	0.528522	0.0306472	-0.0423993	-0.162735	0.348162	0.542265	0.335998	0.0358121	0.485006	0.492464
Capana11g000079	-0.0955393	0.298255	0.560437	0.757661	0.0213694	0.221917	0.509029	-0.382515	0.526784	0.93023	0.442725	0.749154	0.440338	0.559579	-0.342812	0.7916	-0.148931	0.628766	0.6378	0.519802	0.306874	0.229333	0.212519	-0.243702	0.290582	0.704883	0.914986	0.185798	0.46288	0.795312	0.713893	0.15312	0.347424	0.6664	0.801178	0.37994	0.1727	0.690949	0.866319	0.849053	0.0918711	0.119064	-0.203266	0.067449	0.846044	0.180832	-0.255629	0.85823	0.858144
Capana11g001647	0.125199	0.295175	0.465329	0.824961	0.298495	0.372277	0.502494	-0.317447	0.551211	0.832987	0.360597	0.409521	0.356436	0.280128	-0.262214	0.754126	-0.212639	0.647875	0.620677	0.482201	0.376122	0.312898	0.027254	-0.219523	0.147138	0.79105	0.844036	-0.160954	0.713316	0.540643	0.640467	-0.00129114	0.459222	0.637827	0.627276	0.628447	0.358988	0.715438	0.63293	0.651023	0.0242964	-0.13596	-0.19007	-0.327861	0.778786	-0.118673	-0.304132	0.881899	0.874311
Capana01g001154	0.0918675	-0.37351	-0.260175	0.400549	0.442912	0.501728	-0.0747135	-0.338855	0.588291	0.184965	0.136052	-0.116577	0.358643	-0.104767	-0.306722	0.488477	-0.445442	0.56797	0.0404061	0.223525	-0.125215	0.642353	-0.288307	0.117645	0.0929498	0.324723	0.37212	-0.344852	0.797827	0.0479683	0.380385	-0.21612	0.0886867	0.473525	0.0300206	0.511477	0.394383	0.52825	0.000122342	0.0130929	0.207797	0.0376444	0.160438	-0.322104	0.284423	-0.537948	-0.0109664	0.280905	0.269125
Capana08g002672	-0.50985	0.326095	0.671955	0.0441748	-0.51083	-0.580305	0.271449	-0.230601	-0.258324	0.544648	0.665952	0.507458	-0.170988	0.44398	-0.287102	0.0588132	0.0630965	-0.193128	0.394763	-0.0511545	0.0933919	-0.35455	0.0182659	-0.211146	-0.27844	0.102751	0.265992	0.0716221	-0.345609	0.398243	-0.0319563	0.0601917	0.181307	-0.00538383	0.435697	-0.353383	-0.509046	-0.0259793	0.550814	0.422224	-0.178024	-0.317419	-0.328976	0.193532	0.455733	0.0805259	-0.104888	0.472265	0.475359
Capana01g002361	-0.36384	0.0511311	0.162652	0.175349	-0.460052	0.0887095	0.00766525	-0.686195	0.381741	0.464345	0.669538	0.701644	0.332496	0.755928	-0.502687	0.517598	-0.404983	0.163498	0.210131	0.534565	-0.0730009	0.272655	0.269306	0.130637	0.161163	0.355904	0.549536	0.24319	0.0137683	0.598231	0.295737	-0.0539998	0.00773356	0.583973	0.352585	-0.112501	-0.155833	0.504177	0.649923	0.606852	0.166044	0.383901	0.0308272	0.337888	0.581577	0.310841	0.155006	0.266405	0.269224
Capana01g000019	-0.235267	-0.0250567	0.0956365	-0.755174	-0.568836	-0.781649	-0.402549	0.00464268	-0.821067	-0.493334	0.221176	-0.46452	-0.661229	-0.358266	0.234884	-0.86186	-0.0409628	-0.843372	-0.424156	-0.710506	-0.305261	-0.485477	-0.426271	0.304728	-0.576802	-0.732624	-0.751062	-0.374315	-0.779524	-0.576769	-0.829548	-0.366084	-0.34368	-0.782844	-0.466223	-0.66494	-0.737551	-0.775809	-0.50324	-0.617052	0.0454977	-0.55414	0.177041	0.0153429	-0.466667	-0.0293932	0.399358	-0.388945	-0.388553
Capana02g000177	0.307898	-0.0995106	-0.300004	0.554881	0.723103	0.770854	0.128451	-0.0541083	0.720116	0.190922	-0.262525	0.00250419	0.48298	0.0196396	-0.136148	0.647167	-0.171661	0.67214	0.175711	0.504719	0.124807	0.575084	0.0757493	-0.07424	0.321056	0.571775	0.469909	-0.0688224	0.858045	0.156439	0.547918	0.0654671	0.264465	0.609055	0.0888301	0.66849	0.709443	0.643627	0.0946586	0.203993	0.0634466	0.283124	0.0319506	-0.298909	0.268163	-0.32851	-0.238818	0.210603	0.202327
Capana01g004240	-0.27219	0.143812	-0.162892	0.366011	0.414681	0.248676	0.448652	0.417555	0.309918	0.273695	-0.460918	0.497642	0.249146	0.470907	-0.149848	0.543968	0.483723	0.462355	0.381962	0.500127	0.326876	-0.0512763	0.648401	-0.556081	0.21999	0.466038	0.376449	0.706553	0.268063	0.525136	0.478619	0.755985	0.436266	0.360205	0.310704	0.124095	0.329746	0.248606	0.425659	0.460274	-0.411951	0.48302	-0.512226	0.139028	0.261393	-0.0177743	-0.643131	0.0402195	0.0406697
Capana03g000296	-0.0290802	-0.214974	-0.165474	0.504617	0.271946	0.682162	0.0321426	-0.47988	0.89326	0.417972	0.209507	0.526886	0.741701	0.523869	-0.533888	0.861496	-0.337198	0.701925	0.227696	0.675931	-0.107517	0.702258	0.209813	0.0070126	0.518098	0.53678	0.72406	0.247929	0.662264	0.548838	0.700621	0.079804	0.0895864	0.88853	0.323523	0.387581	0.492653	0.85787	0.497986	0.553703	0.217411	0.659593	0.0950961	0.22766	0.51199	-0.0690738	-0.0395472	0.27436	0.275807
Capana03g004186	0.284874	-0.0279884	0.289549	0.860713	0.237318	0.627567	0.407469	-0.355373	0.825926	0.813152	0.364206	0.602159	0.734175	0.336586	-0.41946	0.840603	-0.178304	0.813334	0.520343	0.524937	0.218897	0.562706	0.125818	-0.149674	0.639519	0.711188	0.944458	0.156207	0.716577	0.68337	0.903619	0.0371237	0.179646	0.824086	0.760637	0.670288	0.591877	0.900175	0.706693	0.780758	0.125228	0.341911	-0.0680493	0.0831423	0.627923	0.141144	-0.155522	0.806265	0.810152
Capana07g000221	0.360428	-0.140704	-0.383062	0.419937	0.735193	0.850772	-0.0537314	-0.132684	0.801353	0.0608151	-0.24465	0.00919913	0.60809	0.0483092	-0.207816	0.627239	-0.20688	0.58577	0.0708698	0.487061	-0.0763987	0.670105	0.0246481	0.102856	0.482145	0.460426	0.412974	-0.0330805	0.754541	0.0795956	0.521313	-0.0202668	0.0928151	0.659885	-0.00884735	0.555212	0.777096	0.705385	0.0309525	0.176498	0.218188	0.481536	0.235328	-0.0922253	0.120467	-0.267837	-0.0391432	0.0578725	0.0558202
Capana10g002370	0.250044	-0.102509	-0.114675	0.664899	0.531288	0.803964	0.104617	-0.397757	0.929982	0.458456	0.126403	0.348648	0.720381	0.260081	-0.422802	0.875275	-0.312017	0.766823	0.280133	0.578828	-0.0279984	0.724163	0.038586	0.0606395	0.55355	0.628977	0.756853	0.0428396	0.810791	0.421889	0.772283	-0.0525502	0.105708	0.847885	0.367785	0.606925	0.687859	0.91183	0.401624	0.506741	0.272024	0.503422	0.175823	0.011214	0.445441	-0.128039	-0.0490118	0.439034	0.441064
Capana02g001917	-0.196252	-0.0887843	-0.0423273	0.519391	0.111073	0.516142	0.17194	-0.423973	0.785337	0.545839	0.23981	0.750394	0.665233	0.705893	-0.539026	0.887128	-0.190536	0.656728	0.325646	0.71644	-0.00117757	0.508204	0.400996	-0.153593	0.476304	0.580141	0.783961	0.472148	0.490414	0.742436	0.732836	0.244316	0.145867	0.850473	0.485661	0.254953	0.339044	0.783662	0.691446	0.717841	0.0728486	0.696935	-0.0912881	0.358236	0.611362	0.0952699	-0.175195	0.329581	0.335062
Capana08g001874	-0.115566	-0.289899	-0.0657515	0.579143	0.0361984	0.44913	0.129128	-0.465751	0.75725	0.606197	0.353206	0.720257	0.646232	0.466326	-0.550728	0.821536	-0.212799	0.685848	0.21155	0.44688	-0.0970853	0.5379	0.200946	-0.0732443	0.554142	0.475034	0.791775	0.4485	0.45079	0.742622	0.848553	0.0693363	-0.111534	0.719557	0.657952	0.271467	0.293296	0.727217	0.658916	0.672069	0.134815	0.673736	-0.0195187	0.455692	0.501948	0.167001	-0.0967741	0.483507	0.497176
Capana08g001467	0.393645	0.278272	-0.0932673	0.0271098	-0.0650939	0.0485789	0.188969	0.369761	-0.326489	-0.227209	-0.617761	-0.257536	-0.381936	-0.204692	0.807522	-0.286936	0.114362	-0.167344	-0.206564	0.163687	0.561864	-0.340188	0.447043	-0.284743	-0.201049	0.161582	-0.247208	0.0245022	-0.0779031	-0.108607	-0.172376	0.110588	0.152206	-0.314087	-0.135987	0.245013	-0.0572518	-0.371557	-0.194018	-0.150778	-0.337175	-0.197827	-0.278453	-0.353796	-0.0574245	0.434084	-0.333124	-0.205976	-0.212006
Capana00g003083	-0.262742	-0.198442	0.0856749	-0.536031	-0.543831	-0.575675	-0.431631	-0.331072	-0.44648	-0.234821	0.573198	-0.170148	-0.409509	-0.158613	-0.162751	-0.454059	-0.124215	-0.667192	-0.382729	-0.546441	-0.46766	-0.237702	-0.429162	0.134144	-0.456678	-0.508171	-0.384333	-0.276916	-0.589933	-0.298398	-0.464782	-0.494406	-0.44898	-0.425213	-0.209381	-0.559495	-0.60545	-0.389059	-0.231272	-0.330989	-0.136406	-0.284268	0.0497639	0.283986	-0.239958	-0.178932	0.27817	-0.164874	-0.147044
Capana01g004472	-0.177759	-0.182812	0.0692822	-0.467677	-0.394376	-0.475477	-0.359172	-0.229543	-0.390995	-0.246128	0.47197	-0.214476	-0.388178	-0.193648	-0.168851	-0.396651	-0.0149696	-0.594803	-0.32447	-0.499924	-0.404725	-0.237005	-0.386607	-0.00365496	-0.451885	-0.458454	-0.364603	-0.263786	-0.480976	-0.315545	-0.416081	-0.418032	-0.358434	-0.389785	-0.225613	-0.441534	-0.470742	-0.350019	-0.258608	-0.333754	-0.265648	-0.273659	-0.0463272	0.207647	-0.250614	-0.285495	0.150983	-0.170448	-0.15124
Capana03g003279	0.0527789	-0.175037	-0.0329026	0.579266	0.307933	0.616264	0.0138662	-0.562254	0.876543	0.527784	0.328507	0.496524	0.715514	0.359028	-0.520648	0.856894	-0.389642	0.695065	0.223872	0.47938	-0.184058	0.702062	-0.0264237	0.118287	0.537602	0.516257	0.776989	0.106208	0.645872	0.520021	0.767117	-0.113971	-0.0424216	0.816435	0.458643	0.3995	0.464942	0.873031	0.502715	0.55542	0.364536	0.543145	0.223799	0.24968	0.499178	-0.0610015	0.0519067	0.479592	0.486508
Capana01g000273	-0.217782	-0.281114	-0.0636408	-0.560465	-0.578531	-0.527882	-0.496129	-0.381962	-0.45094	-0.30438	0.631806	-0.295131	-0.42995	-0.268054	-0.176092	-0.526893	-0.275278	-0.665762	-0.436225	-0.576729	-0.475005	-0.137941	-0.522941	0.400699	-0.443451	-0.526301	-0.444014	-0.403753	-0.556509	-0.403006	-0.530093	-0.618541	-0.503482	-0.44996	-0.287701	-0.521136	-0.581198	-0.397353	-0.334728	-0.427296	0.023387	-0.333654	0.219413	0.106824	-0.328982	-0.131453	0.464607	-0.18817	-0.178509
Capana10g002350	-0.187332	-0.0853512	0.191926	-0.515928	-0.565597	-0.530661	-0.459114	-0.362377	-0.422573	-0.252298	0.326184	-0.176937	-0.262204	-0.169798	0.11917	-0.498152	-0.34431	-0.45385	-0.374828	-0.513292	-0.457564	-0.132435	-0.455195	0.516674	-0.193334	-0.646614	-0.395476	-0.273518	-0.550226	-0.286136	-0.464003	-0.432782	-0.48988	-0.434706	-0.218734	-0.525729	-0.631172	-0.406007	-0.246306	-0.356149	0.564505	-0.20948	0.522441	0.26796	-0.207958	0.198364	0.625092	-0.180249	-0.176559
Capana02g000997	-0.231321	-0.210335	0.182683	-0.443377	-0.63592	-0.567215	-0.41213	-0.482051	-0.410201	-0.111926	0.738047	-0.191124	-0.346593	-0.200499	-0.172017	-0.458113	-0.365937	-0.546134	-0.304517	-0.555106	-0.43563	-0.102935	-0.577185	0.40824	-0.391634	-0.486696	-0.301776	-0.456422	-0.48265	-0.286799	-0.454968	-0.616763	-0.440595	-0.3762	-0.142401	-0.463035	-0.623802	-0.313568	-0.188515	-0.308279	0.19032	-0.419407	0.268146	0.11223	-0.141191	-0.0789134	0.507015	0.0167474	0.0225044
Capana12g000894	0.186002	0.188369	-0.182735	-0.192454	0.219004	-0.143384	0.231029	0.802828	-0.521171	-0.445446	-0.728214	-0.52433	-0.479875	-0.417867	0.540692	-0.510749	0.50774	-0.206265	-0.0251808	-0.188822	0.428282	-0.484901	0.203897	-0.239796	-0.293815	-0.192141	-0.548948	0.00363422	-0.13735	-0.422115	-0.418304	0.368463	0.297669	-0.553282	-0.377618	0.0649166	0.0434378	-0.59684	-0.477759	-0.447244	-0.382791	-0.351449	-0.277738	-0.539613	-0.438044	-0.0347218	-0.298054	-0.391047	-0.405239
Capana03g003830	-0.21351	-0.163999	9.78455e-05	-0.628792	-0.551261	-0.62292	-0.459605	-0.244391	-0.59447	-0.376939	0.490389	-0.370115	-0.558463	-0.307014	-0.0289834	-0.632353	-0.159203	-0.76926	-0.442718	-0.621657	-0.408112	-0.298015	-0.481386	0.282742	-0.558686	-0.573649	-0.555343	-0.411214	-0.638551	-0.476307	-0.642575	-0.547479	-0.433137	-0.578299	-0.361341	-0.565721	-0.642343	-0.537887	-0.40266	-0.499907	-0.0782986	-0.436758	0.13148	0.0669039	-0.367886	-0.156529	0.366871	-0.261006	-0.251337
Capana06g000979	0.00514683	-0.199096	-0.232964	0.41033	0.314434	0.62542	-0.156473	-0.619743	0.8335	0.311292	0.274744	0.364204	0.6037	0.338807	-0.50768	0.803902	-0.463078	0.561017	0.0574075	0.495727	-0.291698	0.70351	-0.0317316	0.20557	0.394917	0.437881	0.624398	0.0491068	0.58498	0.376097	0.616347	-0.19599	-0.105042	0.760758	0.229676	0.304554	0.401768	0.79647	0.33838	0.393415	0.353269	0.58746	0.295753	0.206899	0.398195	-0.144023	0.106624	0.247921	0.255758
Capana06g001477	0.462506	0.267243	-0.0589703	0.269589	-0.0290964	0.25657	0.292905	0.239685	-0.0701026	-0.0222279	-0.555423	-0.0503808	-0.171969	-0.0676395	0.695427	-0.00813985	0.0534801	0.0982239	-0.0874239	0.36673	0.619634	-0.176719	0.553908	-0.326177	-0.00399488	0.348508	0.0276133	0.146504	0.115432	0.127161	0.109221	0.150214	0.175489	-0.0671235	0.076312	0.431373	0.0922344	-0.11851	0.0186076	0.0823277	-0.277821	-0.00223681	-0.277117	-0.299419	0.130016	0.54563	-0.374155	-0.0294309	-0.0322633
Capana11g000757	0.218173	-0.490647	-0.420398	0.450478	0.460888	0.773419	-0.157416	-0.399924	0.886393	0.194092	0.0948774	0.17127	0.706217	0.0649939	-0.452279	0.687417	-0.369786	0.68092	-0.0282749	0.36257	-0.275833	0.823686	-0.10322	0.175862	0.563264	0.354227	0.530312	0.0399777	0.737426	0.246618	0.677111	-0.16328	-0.167585	0.704984	0.18876	0.488623	0.627837	0.763043	0.150608	0.239762	0.294269	0.600478	0.281377	0.147335	0.180045	-0.224286	0.0842213	0.197062	0.202196
Capana09g000936	-0.199843	-0.0850973	0.0813191	-0.686023	-0.652896	-0.716673	-0.428334	-0.164793	-0.738937	-0.436344	0.339504	-0.419537	-0.641084	-0.331036	0.192631	-0.771148	-0.164511	-0.793073	-0.467052	-0.640527	-0.314508	-0.404388	-0.417765	0.296232	-0.588549	-0.67125	-0.6597	-0.399434	-0.715655	-0.504106	-0.751243	-0.471243	-0.399995	-0.706107	-0.410077	-0.588983	-0.758749	-0.694852	-0.448137	-0.566779	0.0304833	-0.512952	0.173742	0.0188576	-0.370167	0.00403357	0.401496	-0.325975	-0.32211
Capana08g002436	-0.274196	0.0816683	0.102482	0.47504	0.0674094	0.416137	0.175895	-0.494791	0.703809	0.565508	0.282445	0.734864	0.577347	0.775343	-0.486797	0.867496	-0.268537	0.590123	0.380691	0.749779	0.0216271	0.438323	0.374125	-0.117764	0.334338	0.581535	0.76741	0.357709	0.456192	0.716816	0.613286	0.223619	0.243976	0.829368	0.425718	0.198361	0.216369	0.750493	0.708317	0.709059	0.157007	0.556671	-0.0516995	0.266669	0.717999	0.0693601	-0.139667	0.345337	0.345812
Capana11g001029	0.356522	-0.0179143	-0.131974	0.678278	0.641159	0.765813	0.296143	-0.0297354	0.703637	0.330833	-0.237544	0.070553	0.487574	0.0774547	-0.070454	0.666579	-0.159952	0.751212	0.309437	0.594842	0.317063	0.531093	0.175162	-0.19055	0.320964	0.671845	0.56326	-0.0635978	0.919406	0.262846	0.588396	0.144006	0.405061	0.645257	0.200998	0.789759	0.705303	0.66397	0.213421	0.313214	0.00584758	0.181589	-0.0858791	-0.399717	0.415824	-0.232704	-0.324138	0.348707	0.335651
Capana07g001083	-0.146921	-0.0908331	0.137052	0.488149	-0.0468896	0.373399	0.029754	-0.731828	0.716942	0.625661	0.62891	0.654588	0.573097	0.542008	-0.611478	0.801714	-0.439959	0.517369	0.262077	0.479361	-0.173468	0.550627	0.0257227	0.104288	0.367161	0.485775	0.789529	0.132307	0.413968	0.629099	0.653961	-0.161878	-0.0513177	0.765351	0.529561	0.205182	0.174173	0.790887	0.653708	0.65166	0.283838	0.45493	0.131419	0.319667	0.625541	0.0604182	0.0896809	0.534177	0.543377
Capana07g002280	-0.280292	-0.131183	0.0235754	-0.480045	-0.398532	-0.589727	-0.33307	-0.176721	-0.47814	-0.206762	0.519849	-0.178829	-0.47849	-0.227063	-0.218481	-0.423596	0.0449218	-0.658917	-0.298972	-0.609628	-0.413752	-0.324405	-0.430973	0.112118	-0.473342	-0.451577	-0.379297	-0.221665	-0.603154	-0.307039	-0.419055	-0.430145	-0.407767	-0.481402	-0.149591	-0.561602	-0.529398	-0.413621	-0.234061	-0.315385	-0.240416	-0.296637	-0.0204375	0.207397	-0.325382	-0.228456	0.186012	-0.117858	-0.0979554
Capana01g001420	-0.32888	-0.185392	0.0172744	-0.689483	-0.595151	-0.706989	-0.487388	-0.252177	-0.631895	-0.381813	0.520642	-0.349335	-0.554752	-0.272637	-0.0716225	-0.665968	-0.176498	-0.776594	-0.429905	-0.667661	-0.467399	-0.304436	-0.521474	0.352016	-0.563562	-0.651144	-0.585536	-0.39742	-0.686073	-0.476612	-0.689013	-0.514929	-0.43962	-0.602484	-0.378243	-0.661819	-0.713648	-0.574342	-0.398133	-0.519476	0.0189713	-0.443197	0.188385	0.105004	-0.373197	-0.169126	0.437077	-0.281363	-0.274773
Capana01g004288	0.0172921	0.0261527	-0.188848	0.130465	0.678277	0.15118	0.329786	0.720584	0.00572253	-0.131066	-0.608029	-0.265223	-0.00546174	-0.215173	0.00139147	0.0311986	0.546088	0.307055	0.304191	-0.0210392	0.244669	-0.104534	0.0894029	-0.323457	-0.00685583	0.021076	-0.12129	0.117324	0.342594	-0.167691	0.0279841	0.555754	0.458357	-0.0725912	-0.152774	0.242904	0.43454	-0.0881906	-0.21966	-0.174413	-0.277082	-0.0750978	-0.270125	-0.419711	-0.21287	-0.48427	-0.406695	-0.120718	-0.134584
Capana11g000364	-0.260579	-0.224145	0.223537	-0.0161907	-0.569252	-0.178483	-0.196521	-0.569197	0.14803	0.287849	0.530755	0.536443	0.256867	0.334289	-0.287732	0.170591	-0.281821	0.0566719	-0.109328	-0.0531765	-0.371094	0.151792	-0.0517348	0.170561	0.276551	-0.175778	0.275214	0.287478	-0.263679	0.426088	0.257087	-0.180337	-0.461431	0.161004	0.393961	-0.302619	-0.355992	0.157687	0.400582	0.319212	0.370165	0.384269	0.230767	0.724912	0.227937	0.416204	0.323063	0.197173	0.216561
Capana03g000794	-0.331278	-0.0310155	0.162367	-0.651252	-0.597807	-0.737182	-0.426469	-0.190515	-0.656432	-0.342412	0.276938	-0.268002	-0.488637	-0.214301	0.166967	-0.666038	-0.202051	-0.639632	-0.383453	-0.625673	-0.401438	-0.343319	-0.437689	0.434239	-0.417134	-0.709525	-0.566327	-0.283071	-0.70336	-0.38581	-0.652224	-0.358116	-0.410808	-0.630238	-0.316134	-0.673669	-0.770745	-0.623384	-0.333832	-0.470597	0.365711	-0.379396	0.366374	0.173611	-0.298149	0.0977902	0.519533	-0.273938	-0.273281
Capana00g003170	-0.159417	-0.201666	0.0750895	-0.705132	-0.640977	-0.633282	-0.510593	-0.243703	-0.619078	-0.445513	0.428053	-0.390557	-0.49325	-0.301473	0.0707447	-0.732756	-0.193079	-0.774042	-0.490878	-0.636048	-0.43798	-0.280674	-0.473263	0.304475	-0.47514	-0.707387	-0.623685	-0.399704	-0.678584	-0.507459	-0.703953	-0.5193	-0.470518	-0.601783	-0.421041	-0.582607	-0.673406	-0.584794	-0.443453	-0.546851	0.0476816	-0.413006	0.216752	0.154037	-0.392018	-0.0618138	0.464287	-0.342891	-0.335118
Capana02g002634	0.385792	0.322126	0.0217123	0.128959	-0.0731579	0.0221385	0.363255	0.458361	-0.343459	-0.107519	-0.568665	-0.199962	-0.381771	-0.183923	0.733493	-0.256753	0.234275	-0.0772546	-0.0274835	0.169713	0.687316	-0.401246	0.488039	-0.382718	-0.191913	0.197827	-0.176984	0.0732163	-0.0382278	-0.0329754	-0.123385	0.227821	0.276253	-0.305487	-0.0251825	0.316825	-0.0180818	-0.361319	-0.104773	-0.067298	-0.421745	-0.262017	-0.39362	-0.447584	-0.00599456	0.433047	-0.411617	-0.0832873	-0.0913705
Capana07g000030	0.134524	-0.309138	-0.493247	0.369947	0.623872	0.723362	-0.141257	-0.228385	0.796727	0.0913251	-0.117428	0.14445	0.584125	0.0917616	-0.381228	0.682537	-0.198957	0.578129	-0.0232718	0.373477	-0.256233	0.664079	-0.0123426	0.113291	0.463337	0.368351	0.435457	0.125602	0.638203	0.189124	0.60164	-0.0393152	-0.0925913	0.621203	0.0932708	0.369707	0.622795	0.666749	0.0946578	0.198564	0.199532	0.630722	0.223358	0.139847	0.0983158	-0.278872	-0.033914	0.0566123	0.063771
Capana01g002584	0.190189	0.318423	-0.105879	-0.297323	0.109485	-0.267166	0.152087	0.766455	-0.653476	-0.493601	-0.779576	-0.509946	-0.587382	-0.406966	0.739065	-0.614388	0.477396	-0.3934	-0.152459	-0.238338	0.404664	-0.612136	0.227072	-0.225433	-0.353031	-0.234925	-0.627985	0.00410516	-0.335498	-0.442856	-0.506846	0.290346	0.196837	-0.669351	-0.393967	-0.0756855	-0.123509	-0.7133	-0.487567	-0.465154	-0.344478	-0.37713	-0.239147	-0.401209	-0.448334	0.127246	-0.269995	-0.446608	-0.455869
Capana02g003126	-0.254195	-0.141107	0.23153	0.386309	-0.284754	0.134485	-0.00849988	-0.801106	0.51634	0.626835	0.791989	0.595439	0.410811	0.467586	-0.580198	0.620953	-0.525951	0.393765	0.207848	0.302641	-0.200497	0.454715	-0.101068	0.178076	0.20624	0.339144	0.686356	0.0176439	0.276236	0.577336	0.502869	-0.264517	-0.115071	0.589795	0.523081	0.0876805	-0.07462	0.616916	0.615042	0.553774	0.330132	0.248605	0.151231	0.277027	0.624421	0.0818019	0.186956	0.574728	0.580631
Capana06g000346	0.044231	0.35022	0.00414144	-0.389972	0.121004	-0.447928	0.161725	0.829259	-0.76165	-0.465296	-0.642032	-0.508454	-0.654448	-0.395303	0.59974	-0.68749	0.606225	-0.538045	-0.0711256	-0.383311	0.332027	-0.723982	0.11266	-0.292879	-0.467247	-0.295321	-0.678681	-0.0436881	-0.447261	-0.499208	-0.606528	0.305442	0.245003	-0.737319	-0.403063	-0.232536	-0.189379	-0.769391	-0.48246	-0.480899	-0.477415	-0.516678	-0.343233	-0.35626	-0.487888	-0.0762316	-0.309467	-0.412849	-0.420678
Capana00g004676	-0.403435	-0.431531	-0.00580332	0.0881062	-0.486667	0.0201466	-0.242748	-0.790007	0.409944	0.362832	0.775321	0.537899	0.399098	0.44775	-0.626508	0.402191	-0.542097	0.24601	-0.037032	0.158102	-0.423002	0.471474	-0.115158	0.312387	0.233954	0.0277887	0.44045	0.13978	0.0616042	0.4678	0.335293	-0.256542	-0.338429	0.453859	0.334593	-0.165621	-0.221189	0.429364	0.447511	0.358255	0.387343	0.405258	0.25333	0.495219	0.385784	0.121536	0.365651	0.260935	0.267809
Capana04g000806	0.0317547	-0.19995	-0.336231	0.327647	0.250318	0.698564	-0.0352016	-0.319947	0.756193	0.150252	-0.0633365	0.361621	0.614174	0.497328	-0.282405	0.672407	-0.29667	0.530405	0.0577576	0.75202	-0.0139399	0.606303	0.389569	-0.0660041	0.410053	0.491882	0.492254	0.263278	0.577135	0.395726	0.493331	0.152536	0.138016	0.77201	0.0648069	0.356525	0.4645	0.676483	0.309988	0.382865	0.0639515	0.64901	0.0135788	0.152692	0.386764	-0.0248859	-0.112045	-0.0315017	-0.0347074
Capana06g001221	-0.216774	0.0444675	0.266007	-0.613606	-0.536189	-0.782064	-0.322853	-0.054795	-0.758972	-0.310902	0.287829	-0.384451	-0.58621	-0.342838	0.240391	-0.7717	-0.0997308	-0.730769	-0.314846	-0.707697	-0.268752	-0.44351	-0.494643	0.320033	-0.513211	-0.643835	-0.605516	-0.426917	-0.690073	-0.482112	-0.717504	-0.387993	-0.303792	-0.713997	-0.310901	-0.590722	-0.720855	-0.676967	-0.381397	-0.504342	0.171401	-0.621909	0.216872	0.0114458	-0.32813	-0.00347657	0.407754	-0.178419	-0.180029
Capana06g001652	0.198379	-0.310832	-0.376547	0.442436	0.389034	0.622456	0.019656	-0.0828303	0.721071	0.247101	-0.1038	0.444305	0.63588	0.146788	-0.345826	0.634683	0.0767831	0.553123	0.0109513	0.275879	-0.156731	0.484022	0.19279	-0.0282528	0.733462	0.341163	0.51585	0.525768	0.355773	0.437144	0.795062	0.0965624	-0.271811	0.53451	0.446932	0.278479	0.586786	0.591975	0.315333	0.434485	0.0637541	0.837968	0.073917	0.511123	0.0162154	0.180882	-0.100179	0.170243	0.19275
Capana06g001868	0.108535	0.0678552	-0.166017	0.55643	0.797075	0.605869	0.18064	-0.0152395	0.684148	0.335872	-0.188759	0.190384	0.469168	0.135874	-0.264217	0.734609	-0.011889	0.604293	0.299444	0.417055	0.0434787	0.441294	0.0391511	-0.111383	0.317914	0.606218	0.552257	0.0499483	0.707053	0.261037	0.610526	0.134766	0.265927	0.599481	0.243796	0.459616	0.644162	0.661411	0.250117	0.3473	0.0473618	0.311349	-0.0130577	-0.0981099	0.296773	-0.368076	-0.298747	0.324226	0.32337
Capana07g002132	-0.261023	-0.0616468	0.175026	-0.559853	-0.615535	-0.607868	-0.454595	-0.373184	-0.50365	-0.257764	0.423026	-0.224348	-0.363573	-0.17271	0.0799166	-0.553988	-0.374791	-0.543605	-0.355837	-0.531439	-0.428029	-0.175374	-0.488022	0.562459	-0.323092	-0.622099	-0.437742	-0.363474	-0.585513	-0.336159	-0.564164	-0.476046	-0.437295	-0.476041	-0.266356	-0.570465	-0.695977	-0.451083	-0.2673	-0.391146	0.504987	-0.337083	0.484608	0.144733	-0.206128	0.135274	0.634706	-0.173899	-0.174872
Capana09g002114	0.0685514	-0.297323	-0.23464	0.62142	0.287359	0.599324	0.155935	-0.245898	0.790827	0.485836	0.0780782	0.589488	0.641319	0.297842	-0.439639	0.815854	-0.0457222	0.720134	0.1572	0.424353	-0.0424348	0.524837	0.244862	-0.155196	0.622036	0.506388	0.725574	0.497258	0.521123	0.643513	0.905749	0.126807	-0.117085	0.669799	0.604709	0.389449	0.497127	0.702887	0.521142	0.590256	0.0130329	0.745529	-0.0642968	0.39969	0.329872	0.125912	-0.220381	0.392079	0.409671
Capana10g001816	-0.12951	0.137216	0.30628	0.752009	0.150783	0.398425	0.400241	-0.442514	0.699385	0.833946	0.391326	0.719692	0.534549	0.595442	-0.460159	0.921322	-0.220387	0.717114	0.549411	0.639678	0.20594	0.403237	0.242217	-0.234372	0.310289	0.752207	0.934289	0.211233	0.614377	0.781765	0.774562	0.151864	0.329904	0.802744	0.690049	0.42852	0.289002	0.804466	0.806588	0.805678	0.0566968	0.29203	-0.187107	0.0709468	0.831392	0.0187885	-0.2832	0.729191	0.729208
Capana11g000100	-0.13984	0.0410733	-0.111473	0.551431	0.280036	0.529654	0.164774	-0.370495	0.735954	0.491549	0.058602	0.625573	0.51959	0.580912	-0.359442	0.901469	-0.196371	0.627046	0.253327	0.69889	0.0464254	0.440819	0.377312	-0.161688	0.34605	0.654787	0.740222	0.381798	0.528082	0.661305	0.718612	0.186922	0.160748	0.760255	0.434494	0.299534	0.333701	0.721641	0.596044	0.633525	0.0609478	0.617276	-0.0795145	0.226013	0.595894	0.0474237	-0.26854	0.317923	0.324185
Capana11g001133	-0.103887	0.0647466	0.00376954	0.500108	0.126761	0.550348	0.310321	-0.193946	0.682033	0.462356	-0.0270022	0.68395	0.604833	0.766503	-0.281307	0.778151	-0.0758527	0.61017	0.381052	0.889197	0.269212	0.378925	0.655216	-0.354306	0.416617	0.663349	0.691401	0.504956	0.506992	0.706634	0.605674	0.453154	0.393529	0.821729	0.362847	0.347031	0.384417	0.685439	0.655611	0.700224	-0.110963	0.598869	-0.281892	0.196971	0.643578	0.162665	-0.35047	0.20095	0.196734
Capana02g002941	0.172742	0.311138	-0.0551196	-0.227524	0.149834	-0.263028	0.217229	0.802822	-0.605985	-0.364986	-0.690628	-0.41906	-0.522045	-0.340267	0.678082	-0.569095	0.530991	-0.42774	-0.0854643	-0.204646	0.456339	-0.600027	0.250608	-0.357975	-0.332304	-0.066516	-0.5283	0.00462611	-0.30148	-0.37153	-0.435629	0.302875	0.268894	-0.577936	-0.290422	-0.0604455	-0.056228	-0.618714	-0.375668	-0.343323	-0.53974	-0.431216	-0.418536	-0.339556	-0.376452	0.0419128	-0.404172	-0.325742	-0.33501
Capana01g002526	0.181981	-0.0956711	-0.318023	0.49067	0.548913	0.708783	-0.0635553	-0.38441	0.805223	0.263728	0.0289036	0.260707	0.530004	0.167367	-0.357751	0.792436	-0.271296	0.55939	0.0562197	0.450474	-0.170755	0.608485	0.0106731	0.117392	0.416901	0.522495	0.584614	0.0789254	0.6096	0.303262	0.67238	-0.150498	-0.0796763	0.669518	0.246559	0.409908	0.5604	0.74689	0.251013	0.357545	0.214861	0.575772	0.219353	0.111175	0.262797	-0.13468	-0.0457073	0.244659	0.256493
Capana02g002922	0.0265539	0.086007	0.141642	0.741768	0.308807	0.606805	0.304242	-0.441253	0.834953	0.709288	0.288498	0.625897	0.640827	0.538661	-0.459455	0.957968	-0.255519	0.743547	0.4714	0.704934	0.145187	0.542058	0.232329	-0.146559	0.426337	0.774461	0.910112	0.178368	0.706722	0.683088	0.800361	0.0949866	0.279492	0.887467	0.573998	0.515676	0.48056	0.902308	0.696945	0.749416	0.105728	0.42071	-0.0754305	0.0593489	0.722974	-0.0142236	-0.221186	0.613335	0.614478
Capana03g001926	-0.150155	-0.00687616	0.193162	-0.612591	-0.58822	-0.636731	-0.442307	-0.220628	-0.619196	-0.372873	0.201157	-0.323206	-0.460952	-0.270728	0.30581	-0.674595	-0.257385	-0.620109	-0.441098	-0.580683	-0.359	-0.306235	-0.418523	0.416214	-0.369141	-0.691828	-0.563169	-0.33565	-0.6515	-0.413861	-0.632096	-0.420998	-0.438851	-0.616104	-0.335023	-0.556659	-0.717276	-0.599569	-0.372592	-0.486575	0.398708	-0.374002	0.407915	0.154502	-0.287824	0.180678	0.528881	-0.280514	-0.278204
Capana03g004213	-0.246412	-0.0698444	0.126601	-0.71586	-0.586416	-0.774613	-0.407164	-0.0643915	-0.76367	-0.430563	0.31455	-0.396401	-0.612366	-0.340575	0.136736	-0.794821	-0.0386747	-0.800793	-0.408066	-0.732945	-0.365269	-0.451539	-0.462307	0.287371	-0.534321	-0.74133	-0.682136	-0.340546	-0.771742	-0.517345	-0.749461	-0.395198	-0.400944	-0.741538	-0.38638	-0.665324	-0.73259	-0.718224	-0.446243	-0.563328	0.0468663	-0.496494	0.179589	0.100577	-0.442043	-0.0399094	0.406381	-0.324486	-0.318848
Capana08g002480	-0.00569478	-0.327068	-0.200806	0.409564	0.0166327	0.469259	0.0745337	-0.237236	0.675192	0.38483	0.127633	0.700258	0.667768	0.424111	-0.452662	0.645755	0.0175176	0.550242	0.0932287	0.37666	-0.127064	0.436122	0.343103	-0.0815382	0.73099	0.301087	0.601669	0.683372	0.222616	0.658222	0.782863	0.190814	-0.247772	0.596483	0.566835	0.151022	0.365422	0.584988	0.540634	0.601602	0.0684715	0.888092	-0.00729131	0.666543	0.206482	0.372597	-0.0580428	0.217037	0.238335
Capana04g000890	0.183918	-0.109604	0.0480741	0.779481	0.337608	0.739063	0.299732	-0.340924	0.911446	0.64626	0.146214	0.573078	0.777369	0.431399	-0.38905	0.909645	-0.229538	0.870587	0.404831	0.685434	0.160225	0.651384	0.259307	-0.165862	0.620256	0.708549	0.884139	0.248723	0.801458	0.668318	0.880528	0.151169	0.214343	0.898644	0.576617	0.645204	0.61927	0.908587	0.626355	0.700736	0.139363	0.523074	-0.0484466	0.104651	0.624925	0.0548908	-0.203847	0.563017	0.563099
Capana11g001506	0.0687807	0.0663508	0.277143	0.852885	0.251461	0.547573	0.450665	-0.362679	0.79492	0.84789	0.343773	0.681247	0.64467	0.484979	-0.462636	0.936494	-0.157565	0.815241	0.575973	0.623689	0.248719	0.483484	0.225205	-0.245226	0.475937	0.782005	0.974963	0.219867	0.713996	0.764681	0.882601	0.147844	0.304234	0.844876	0.746929	0.586321	0.484635	0.880066	0.780907	0.822557	0.0392902	0.339405	-0.178878	0.0490023	0.751975	0.0480936	-0.285741	0.782566	0.784439
Capana01g002647	0.0448906	0.269407	0.462105	0.803399	0.239044	0.398201	0.500521	-0.351231	0.601535	0.83709	0.358517	0.495549	0.430604	0.434492	-0.295565	0.798995	-0.243849	0.681527	0.64025	0.61292	0.384978	0.353836	0.141095	-0.270086	0.169855	0.81393	0.875848	-0.0832181	0.735719	0.615427	0.639408	0.0916462	0.522753	0.733852	0.600645	0.607804	0.345537	0.760218	0.698135	0.705889	0.0115775	-0.0569509	-0.232325	-0.270037	0.863048	-0.10784	-0.324265	0.822106	0.811382
Capana02g002230	-0.219663	0.0270248	0.0824715	-0.725951	-0.380625	-0.78771	-0.289582	0.245797	-0.861499	-0.498551	0.0897042	-0.499216	-0.707456	-0.410223	0.234722	-0.869467	0.209317	-0.872185	-0.345553	-0.750735	-0.22177	-0.599709	-0.378651	0.0940022	-0.616758	-0.671891	-0.77908	-0.317681	-0.767521	-0.611171	-0.815029	-0.231098	-0.227837	-0.829281	-0.458243	-0.643339	-0.625221	-0.814378	-0.528643	-0.6194	-0.220745	-0.603242	-0.0332688	-0.0192475	-0.541083	-0.184238	0.180885	-0.391601	-0.388785
Capana07g000898	0.109285	0.0844588	-0.0255062	-0.405347	-0.424468	-0.43562	-0.0757934	0.223623	-0.704135	-0.416189	-0.131507	-0.466425	-0.693138	-0.365704	0.538035	-0.687965	0.0844509	-0.622825	-0.35556	-0.321089	0.21482	-0.515918	0.0289776	-0.112322	-0.573048	-0.30179	-0.591042	-0.245011	-0.474457	-0.414647	-0.607732	-0.174903	-0.0680862	-0.661104	-0.356627	-0.182077	-0.468001	-0.693217	-0.42352	-0.468916	-0.405641	-0.523288	-0.225657	-0.309206	-0.301165	0.139221	-0.0655449	-0.32518	-0.32703
Capana12g000264	0.0698124	0.416442	0.027244	-0.395801	0.102557	-0.457974	0.13363	0.80087	-0.777448	-0.475676	-0.710897	-0.490002	-0.663037	-0.39967	0.702881	-0.690976	0.566518	-0.538602	-0.116527	-0.388682	0.318631	-0.743003	0.122403	-0.224615	-0.428905	-0.321428	-0.684444	-0.0180427	-0.497007	-0.484685	-0.596057	0.284269	0.182083	-0.769594	-0.385796	-0.260076	-0.23498	-0.794998	-0.479028	-0.477058	-0.343089	-0.472291	-0.241874	-0.301521	-0.487143	0.0557352	-0.251522	-0.42416	-0.430362
Capana09g002123	-0.118175	0.0326495	0.0871353	-0.523469	-0.262388	-0.634086	-0.0632332	0.394594	-0.751428	-0.406362	-0.0166196	-0.413636	-0.65711	-0.381321	0.159526	-0.695817	0.445984	-0.658867	-0.182933	-0.622285	-0.0449003	-0.634089	-0.182472	-0.213951	-0.555017	-0.563041	-0.646189	-0.122366	-0.612795	-0.467425	-0.618234	-0.0192952	-0.0887525	-0.742746	-0.324737	-0.427878	-0.439673	-0.735978	-0.433193	-0.495777	-0.493962	-0.483863	-0.279481	-0.0848836	-0.48791	-0.206935	-0.0849671	-0.323975	-0.314775
Capana10g000710	0.038458	-0.113126	0.0458844	0.710581	0.241499	0.65683	0.254889	-0.425743	0.898614	0.664995	0.286907	0.676633	0.766233	0.54077	-0.534467	0.937395	-0.225926	0.802906	0.411055	0.674775	0.0655513	0.625722	0.260889	-0.128464	0.594007	0.670855	0.897237	0.318633	0.687191	0.719958	0.864026	0.141541	0.16145	0.913495	0.597193	0.498237	0.529031	0.914046	0.691527	0.749304	0.131156	0.593422	-0.0446372	0.221661	0.630925	0.0592345	-0.157734	0.543345	0.547482
Capana03g001041	0.00081483	0.0495283	-0.0731416	0.610649	0.402879	0.635119	0.15356	-0.438289	0.804143	0.49774	0.154403	0.457289	0.542031	0.459677	-0.403077	0.910375	-0.311032	0.66269	0.309289	0.693979	0.0518797	0.557613	0.199287	-0.0689374	0.303769	0.706965	0.758987	0.107856	0.704642	0.524226	0.68068	0.0374838	0.233971	0.818922	0.355016	0.463094	0.459724	0.822925	0.507254	0.564424	0.119456	0.443935	0.00334657	-0.013163	0.610502	-0.135016	-0.19635	0.404548	0.404845
Capana03g001205	0.0881716	0.114951	0.240985	0.822797	0.363358	0.478646	0.384968	-0.380785	0.684803	0.773095	0.324588	0.434792	0.444023	0.27247	-0.354461	0.854207	-0.261768	0.728611	0.495306	0.494784	0.233353	0.448909	0.0211415	-0.164791	0.233175	0.775434	0.867553	-0.0670249	0.769469	0.569569	0.751081	-0.0294689	0.318677	0.703797	0.618559	0.615438	0.414091	0.781851	0.603195	0.629428	0.0638492	0.0775103	-0.121239	-0.201825	0.721371	-0.154055	-0.282304	0.802278	0.79969
Capana04g001537	-0.152403	0.00144399	0.0646335	-0.705069	-0.547695	-0.733215	-0.350062	0.0885756	-0.832004	-0.522802	0.0388075	-0.482702	-0.666779	-0.413376	0.378874	-0.869895	-0.0121057	-0.748034	-0.439326	-0.691285	-0.222036	-0.508297	-0.346076	0.315497	-0.504616	-0.755545	-0.767645	-0.292872	-0.757926	-0.555589	-0.785526	-0.289568	-0.352215	-0.831657	-0.4443	-0.592087	-0.71207	-0.828565	-0.527939	-0.633269	0.133839	-0.494021	0.226862	-0.0222144	-0.494904	0.126187	0.395047	-0.41671	-0.417326
Capana02g002687	-0.0161215	-0.0642396	0.0824841	0.733718	0.195997	0.518701	0.267621	-0.433245	0.796713	0.728043	0.294752	0.707948	0.642079	0.469612	-0.459422	0.918478	-0.213308	0.760608	0.364661	0.546502	0.0592935	0.517598	0.209577	-0.118899	0.526451	0.658828	0.900544	0.337535	0.586086	0.761621	0.896784	0.0844246	0.0670996	0.785638	0.713255	0.423051	0.389778	0.818019	0.721749	0.755047	0.152217	0.540866	-0.044149	0.271577	0.634655	0.139983	-0.184209	0.636396	0.645448
Capana07g001257	0.304143	-0.39625	-0.352978	0.351414	0.444178	0.849861	-0.241516	-0.473737	0.93695	0.116552	0.137463	0.170451	0.809108	0.156503	-0.480404	0.660403	-0.415916	0.596923	-0.0118607	0.439558	-0.34578	0.875911	-0.104334	0.299517	0.662717	0.306053	0.499651	-0.00203067	0.676366	0.174026	0.588564	-0.207066	-0.175713	0.789396	0.0728125	0.44711	0.696127	0.841238	0.129703	0.252879	0.424512	0.670069	0.430289	0.208648	0.139138	-0.16227	0.25453	0.0943832	0.0995987
Capana09g001814	-0.36372	0.0870883	0.0744899	0.467152	-0.00566931	0.333902	0.279046	-0.353036	0.614338	0.581971	0.221766	0.827485	0.504732	0.846087	-0.472709	0.840909	-0.0998611	0.55062	0.407302	0.769893	0.128534	0.298275	0.549819	-0.293383	0.295245	0.608107	0.749482	0.542968	0.357718	0.807617	0.621019	0.383119	0.295695	0.771269	0.487973	0.136839	0.161528	0.65532	0.774136	0.764773	-0.0691637	0.592032	-0.263317	0.32025	0.710344	0.135266	-0.304916	0.310936	0.313485
Capana00g003509	-0.0330767	-0.0628818	0.11572	0.771617	0.208018	0.492431	0.313265	-0.430137	0.77182	0.763871	0.326605	0.664545	0.587901	0.439875	-0.46206	0.921254	-0.225051	0.778668	0.402139	0.541971	0.110678	0.502352	0.180374	-0.178793	0.428712	0.694274	0.911604	0.259618	0.650553	0.751156	0.879791	0.0781762	0.141807	0.773322	0.71322	0.475662	0.370369	0.806771	0.71715	0.735613	0.0838288	0.425306	-0.11565	0.156817	0.690725	0.04171	-0.248996	0.693939	0.700006
Capana06g000298	0.0586847	-0.371035	-0.479296	0.234958	0.339192	0.712227	-0.255051	-0.413362	0.830101	0.0518278	0.0387476	0.308935	0.687666	0.31726	-0.476349	0.667567	-0.299653	0.500594	-0.0853168	0.483718	-0.359227	0.715431	0.105731	0.193428	0.562484	0.273348	0.436483	0.260612	0.479822	0.279729	0.555081	-0.0475404	-0.201194	0.713061	0.0640673	0.22391	0.516862	0.702957	0.184747	0.278776	0.280535	0.829436	0.298881	0.375791	0.127507	-0.075686	0.132557	-0.0722716	-0.0619307
Capana03g003680	0.0767852	-0.0804393	0.152776	0.736852	0.263643	0.615019	0.278214	-0.416293	0.876759	0.722242	0.335373	0.668416	0.762206	0.492054	-0.526737	0.916285	-0.198058	0.776423	0.443493	0.599132	0.0622301	0.598296	0.18128	-0.160099	0.590912	0.674206	0.916037	0.257779	0.678817	0.705385	0.873732	0.0983305	0.158466	0.889316	0.650063	0.506456	0.531943	0.91835	0.70543	0.763287	0.115184	0.506942	-0.0628654	0.237183	0.637746	0.0216728	-0.170921	0.6339	0.63988
Capana05g002555	0.269329	0.156645	0.305953	0.820303	0.421906	0.519869	0.374424	-0.349896	0.662844	0.732503	0.322436	0.2977	0.444218	0.130306	-0.285314	0.760735	-0.271253	0.684494	0.499285	0.417299	0.247359	0.46187	-0.0958819	-0.0889219	0.265425	0.743145	0.81411	-0.222253	0.787529	0.434154	0.693449	-0.130871	0.308031	0.659784	0.56768	0.695029	0.499167	0.779016	0.504708	0.558886	0.123877	-0.0376015	-0.0351358	-0.300084	0.637079	-0.162878	-0.197307	0.82836	0.824459
Capana08g001585	0.115172	-0.0644168	0.139423	0.80278	0.265405	0.617357	0.320028	-0.440681	0.8546	0.754052	0.372426	0.617322	0.674098	0.415275	-0.514527	0.934017	-0.224601	0.795921	0.449615	0.584029	0.122648	0.579195	0.151859	-0.164975	0.505108	0.723391	0.93558	0.187172	0.724634	0.696819	0.888845	0.0334674	0.169559	0.853682	0.680114	0.582959	0.518179	0.904361	0.691525	0.746098	0.0671641	0.42451	-0.0926992	0.100269	0.66155	0.00529457	-0.208632	0.705864	0.711987
Capana02g003578	0.0510656	-0.277052	-0.218868	0.546199	0.387952	0.69757	-0.00723927	-0.488143	0.89117	0.397617	0.215657	0.373692	0.677489	0.317249	-0.52051	0.846026	-0.375715	0.719334	0.168704	0.540969	-0.154214	0.738992	0.0295331	0.0512238	0.452448	0.521046	0.69745	0.089208	0.747763	0.440028	0.714787	-0.0599625	0.0279634	0.817294	0.309764	0.466957	0.526372	0.841856	0.38336	0.441717	0.230124	0.549348	0.143837	0.112001	0.449791	-0.209344	-0.0360341	0.339735	0.342553
Capana00g003816	0.0173162	0.0461271	0.177932	0.771516	0.22132	0.535294	0.33025	-0.429415	0.801894	0.774963	0.311903	0.721369	0.640611	0.51431	-0.452406	0.947159	-0.19469	0.756716	0.449739	0.60823	0.127704	0.489912	0.237377	-0.165158	0.502863	0.725143	0.939926	0.299817	0.611217	0.771679	0.887035	0.102189	0.161236	0.825044	0.721039	0.466115	0.420336	0.85766	0.762918	0.805061	0.116604	0.484683	-0.0845789	0.208731	0.696475	0.127484	-0.220875	0.682028	0.689808
Capana03g003575	0.220641	0.126877	0.302399	0.840871	0.336537	0.640175	0.40669	-0.389531	0.800231	0.760509	0.274012	0.482682	0.626348	0.396588	-0.315962	0.875082	-0.295962	0.795542	0.546641	0.681811	0.301457	0.550309	0.154946	-0.18929	0.401193	0.813644	0.912025	-0.0268763	0.844882	0.604465	0.764811	0.0499128	0.398996	0.858872	0.575206	0.72182	0.54678	0.89692	0.647167	0.704786	0.112083	0.17437	-0.099076	-0.170924	0.775367	-0.0463959	-0.238553	0.743606	0.736811
Capana02g003457	-0.303611	-0.0222789	-0.0919803	-0.639733	-0.263941	-0.693261	-0.324845	0.129137	-0.697666	-0.410717	0.257145	-0.402785	-0.643869	-0.37525	-0.037898	-0.665475	0.17457	-0.809021	-0.313509	-0.728852	-0.336307	-0.477828	-0.448989	0.235274	-0.563022	-0.539744	-0.637439	-0.283311	-0.711354	-0.54128	-0.657501	-0.326136	-0.309367	-0.698732	-0.359429	-0.66345	-0.524364	-0.639604	-0.450391	-0.52009	-0.208033	-0.456748	0.026187	0.00760073	-0.55244	-0.26307	0.216504	-0.300816	-0.292656
Capana06g000492	-0.091693	-0.0580353	-0.112799	0.554305	0.44575	0.58162	0.131574	-0.328566	0.788723	0.458108	0.0661339	0.462508	0.594063	0.447104	-0.422527	0.864286	-0.230865	0.692522	0.292906	0.610532	-0.0187205	0.559683	0.178573	-0.0955097	0.361038	0.605183	0.7046	0.193882	0.687998	0.516576	0.680301	0.148366	0.216643	0.781813	0.340256	0.385193	0.45873	0.769727	0.47636	0.518449	0.143728	0.490371	-0.00164148	0.0959571	0.541762	-0.201028	-0.206449	0.344466	0.343364
Capana08g002282	0.219176	-0.5013	-0.341759	0.507007	0.408683	0.753206	-0.112877	-0.444101	0.890803	0.277739	0.18109	0.195383	0.714968	0.0686264	-0.470549	0.70033	-0.410839	0.719157	0.0191572	0.361281	-0.238768	0.838603	-0.130336	0.16104	0.553101	0.384107	0.585383	-0.00318909	0.777284	0.288206	0.702562	-0.185597	-0.140426	0.725066	0.253156	0.534186	0.606336	0.788492	0.202973	0.278556	0.298375	0.531113	0.257016	0.109462	0.253512	-0.223235	0.0817728	0.296844	0.300076
Capana03g001081	0.00738547	0.215999	0.0429873	-0.548839	-0.249769	-0.597413	-0.00731812	0.579214	-0.873127	-0.524827	-0.376074	-0.50847	-0.740915	-0.401753	0.569942	-0.834749	0.42844	-0.706877	-0.247214	-0.495649	0.191201	-0.732168	0.0252684	-0.178293	-0.548161	-0.489335	-0.766717	-0.106587	-0.644845	-0.52455	-0.730808	0.08872	0.0195631	-0.836058	-0.43439	-0.3723	-0.444139	-0.873714	-0.51166	-0.552289	-0.416566	-0.538963	-0.252028	-0.230034	-0.507759	0.056583	-0.112298	-0.461177	-0.463374
Capana06g001620	0.0851776	0.331151	0.35627	0.80742	0.359466	0.411572	0.448489	-0.337399	0.601606	0.799712	0.302479	0.480301	0.362859	0.334631	-0.292325	0.842497	-0.178443	0.629109	0.564103	0.519221	0.303868	0.307379	0.0860532	-0.199424	0.181106	0.817582	0.86295	-0.0436001	0.655573	0.580987	0.701612	0.00355132	0.379506	0.663429	0.636898	0.552735	0.37148	0.744271	0.653233	0.688441	0.0240276	0.0353635	-0.158726	-0.203866	0.741126	-0.0738821	-0.320294	0.813529	0.813152
Capana10g002189	-0.209337	0.0269661	0.0378115	-0.722811	-0.291531	-0.743373	-0.224212	0.392255	-0.851886	-0.541047	-0.02202	-0.510709	-0.677657	-0.411075	0.204746	-0.868171	0.347669	-0.817753	-0.277954	-0.73331	-0.17938	-0.62403	-0.312126	0.0413447	-0.562519	-0.696298	-0.807403	-0.225265	-0.745489	-0.62366	-0.807272	-0.0901885	-0.15877	-0.829626	-0.485588	-0.618879	-0.526915	-0.827494	-0.554326	-0.628217	-0.272627	-0.545008	-0.0765205	-0.0497169	-0.612123	-0.210032	0.131833	-0.454386	-0.452646
Capana12g002568	-0.000245041	0.0613001	0.101521	-0.584298	-0.570613	-0.629791	-0.252946	0.0785082	-0.802532	-0.46061	0.00921325	-0.466355	-0.716553	-0.369932	0.520188	-0.80903	-0.00981828	-0.775804	-0.458944	-0.507221	-0.0148533	-0.543128	-0.160841	0.0219031	-0.606371	-0.522686	-0.682898	-0.319847	-0.662254	-0.482074	-0.72925	-0.309341	-0.239829	-0.759368	-0.401695	-0.407804	-0.67204	-0.777274	-0.460931	-0.546078	-0.207023	-0.562327	-0.0533354	-0.100524	-0.340921	0.13548	0.131583	-0.359652	-0.357354
Capana12g002675	0.270648	-0.178355	-0.112876	0.647375	0.439771	0.780361	0.0760709	-0.41257	0.939571	0.48335	0.202229	0.447171	0.776551	0.264581	-0.48259	0.856771	-0.251388	0.727416	0.23676	0.501277	-0.099726	0.717288	0.0406912	0.0644338	0.676829	0.573173	0.774871	0.163004	0.692507	0.479598	0.841918	-0.0796366	-0.0447547	0.834498	0.470944	0.535396	0.68142	0.914803	0.452959	0.566798	0.250929	0.621913	0.1784	0.219271	0.371691	-0.00601996	-0.0069215	0.455397	0.466049
Capana03g001019	-0.131748	-0.411147	-0.324502	0.328174	0.281554	0.544994	-0.147888	-0.453327	0.762825	0.226356	0.156746	0.309183	0.616758	0.313506	-0.501446	0.68254	-0.395789	0.619305	0.0331772	0.430909	-0.288891	0.703925	-0.00232441	0.127859	0.384917	0.300254	0.507656	0.127552	0.613794	0.350322	0.547486	-0.0112152	-0.0471392	0.688187	0.150797	0.263095	0.361291	0.667017	0.261722	0.277826	0.309161	0.564685	0.209699	0.203827	0.338808	-0.249152	0.0579639	0.133503	0.132418
Capana05g001195	0.160983	0.124988	-0.183847	-0.27091	0.0374229	-0.231182	0.123909	0.63984	-0.595681	-0.477722	-0.580741	-0.552225	-0.602986	-0.423133	0.570413	-0.570986	0.39154	-0.365792	-0.180092	-0.216512	0.377962	-0.51599	0.177372	-0.306539	-0.471457	-0.206563	-0.592053	-0.0906892	-0.21799	-0.443072	-0.497055	0.196731	0.203658	-0.607143	-0.416721	0.0085701	-0.130525	-0.658445	-0.501311	-0.49786	-0.526869	-0.431789	-0.359475	-0.496275	-0.389034	-0.0654812	-0.326189	-0.412402	-0.42142
Capana04g000095	0.22091	0.305077	-0.0440985	-0.299495	0.0354857	-0.287641	0.155949	0.727436	-0.675762	-0.473687	-0.705574	-0.523125	-0.596641	-0.412809	0.748336	-0.653934	0.440348	-0.423478	-0.151055	-0.244864	0.426434	-0.61172	0.207877	-0.243038	-0.378432	-0.23715	-0.627978	-0.0544528	-0.3383	-0.451083	-0.5369	0.245432	0.203783	-0.672288	-0.390775	-0.0532014	-0.151322	-0.716837	-0.481203	-0.465172	-0.372418	-0.447061	-0.264305	-0.423664	-0.418625	0.131182	-0.257953	-0.41322	-0.423405
[truncated: 154 more columns]
